# Supplementary material
Source: MDPI journal article supplement (https://www.mdpi.com/1996-1073/10/7/908)
Supplement: s1 [file s1]

START RECORD GO HERE.                                                   S      1
1H,,1H;,5HPart1,32HEnergies_WiRE01_rotor_sketch.igs,62HDASSAULT SYSTEMESG      1
 CATIA Version 5-6 Release 2013 - www.3ds.com,35HV5-6R2013_5.23.0.0.10-1G      2
8-2012.20.00,32,75,6,75,15,5HPart1,1.0,2,2HMM,1000,1.0,15H20170414.16185G      3
1,0.001,10000.0,5HMajid,8HWIREPC33,11,0,15H20170414.161851,;            G      4
     108       1       0       0       0       0       0       001010001D      1
     108       0       0       1       0                               0D      2
     124       2       0       0       0       0       0       001020001D      3
     124       0       0       1       0                               0D      4
     100       3       0       0       0       0       3       001010001D      5
     100       0       0       1       0                               0D      6
     124       4       0       0       0       0       0       001020001D      7
     124       0       0       1       0                               0D      8
     100       5       0       0       0       0       7       001010001D      9
     100       0       0       1       0                               0D     10
     102       6       0       0       0       0       0       001010001D     11
     102       0       0       1       0                               0D     12
     142       7       0       0       0       0       0       001010001D     13
     142       0       0       1       0                               0D     14
     124       8       0       0       0       0       0       001020001D     15
     124       0       0       1       0                               0D     16
     100       9       0       0       0       0      15       001010001D     17
     100       0       0       1       0                               0D     18
     124      10       0       0       0       0       0       001020001D     19
     124       0       0       1       0                               0D     20
     100      11       0       0       0       0      19       001010001D     21
     100       0       0       1       0                               0D     22
     102      12       0       0       0       0       0       001010001D     23
     102       0       0       1       0                               0D     24
     142      13       0       0       0       0       0       001010001D     25
     142       0       0       1       0                               0D     26
     144      14       0       0   10000       0       0       000000000D     27
     144       0       0       1       0                PartBody       0D     28
     110      15       0       0       0       0       0       001010001D     29
     110       0       0       1       0                               0D     30
     110      16       0       0       0       0       0       001010001D     31
     110       0       0       1       0                               0D     32
     120      17       0       0       0       0       0       001010001D     33
     120       0       0       1       0                               0D     34
     126      18       0       0       0       0       0       001010001D     35
     126       0       0       5       0                               0D     36
     126      23       0       0       0       0       0       001010001D     37
     126       0       0       5       0                               0D     38
     126      28       0       0       0       0       0       001010001D     39
     126       0       0       5       0                               0D     40
     126      33       0       0       0       0       0       001010001D     41
     126       0       0       5       0                               0D     42
     126      38       0       0       0       0       0       001010001D     43
     126       0       0       6       0                               0D     44
     126      44       0       0       0       0       0       001010001D     45
     126       0       0       6       0                               0D     46
     126      50       0       0       0       0       0       001010001D     47
     126       0       0       5       0                               0D     48
     110      55       0       0       0       0       0       001010001D     49
     110       0       0       1       0                               0D     50
     124      56       0       0       0       0       0       001020001D     51
     124       0       0       1       0                               0D     52
     100      57       0       0       0       0      51       001010001D     53
     100       0       0       1       0                               0D     54
     110      58       0       0       0       0       0       001010001D     55
     110       0       0       1       0                               0D     56
     126      59       0       0       0       0       0       001010001D     57
     126       0       0       5       0                               0D     58
     126      64       0       0       0       0       0       001010001D     59
     126       0       0       5       0                               0D     60
     126      69       0       0       0       0       0       001010001D     61
     126       0       0       5       0                               0D     62
     126      74       0       0       0       0       0       001010001D     63
     126       0       0       5       0                               0D     64
     126      79       0       0       0       0       0       001010001D     65
     126       0       0       4       0                               0D     66
     126      83       0       0       0       0       0       001010001D     67
     126       0       0       5       0                               0D     68
     110      88       0       0       0       0       0       001010001D     69
     110       0       0       1       0                               0D     70
     124      89       0       0       0       0       0       001020001D     71
     124       0       0       1       0                               0D     72
     100      90       0       0       0       0      71       001010001D     73
     100       0       0       1       0                               0D     74
     110      91       0       0       0       0       0       001010001D     75
     110       0       0       1       0                               0D     76
     102      92       0       0       0       0       0       001010001D     77
     102       0       0       2       0                               0D     78
     142      94       0       0       0       0       0       001010001D     79
     142       0       0       1       0                               0D     80
     126      95       0       0       0       0       0       001010001D     81
     126       0       0       5       0                               0D     82
     126     100       0       0       0       0       0       001010001D     83
     126       0       0      10       0                               0D     84
     126     110       0       0       0       0       0       001010001D     85
     126       0       0       5       0                               0D     86
     126     115       0       0       0       0       0       001010001D     87
     126       0       0       5       0                               0D     88
     126     120       0       0       0       0       0       001010001D     89
     126       0       0       5       0                               0D     90
     126     125       0       0       0       0       0       001010001D     91
     126       0       0       7       0                               0D     92
     126     132       0       0       0       0       0       001010001D     93
     126       0       0       5       0                               0D     94
     126     137       0       0       0       0       0       001010001D     95
     126       0       0       5       0                               0D     96
     126     142       0       0       0       0       0       001010001D     97
     126       0       0       7       0                               0D     98
     126     149       0       0       0       0       0       001010001D     99
     126       0       0       5       0                               0D    100
     126     154       0       0       0       0       0       001010001D    101
     126       0       0       5       0                               0D    102
     126     159       0       0       0       0       0       001010001D    103
     126       0       0       6       0                               0D    104
     102     165       0       0       0       0       0       001010001D    105
     102       0       0       1       0                               0D    106
     142     166       0       0       0       0       0       001010001D    107
     142       0       0       1       0                               0D    108
     144     167       0       0   10000       0       0       000000000D    109
     144       0       0       1       0                PartBody       0D    110
     110     168       0       0       0       0       0       001010001D    111
     110       0       0       1       0                               0D    112
     110     169       0       0       0       0       0       001010001D    113
     110       0       0       1       0                               0D    114
     120     170       0       0       0       0       0       001010001D    115
     120       0       0       1       0                               0D    116
     126     171       0       0       0       0       0       001010001D    117
     126       0       0       5       0                               0D    118
     126     176       0       0       0       0       0       001010001D    119
     126       0       0       5       0                               0D    120
     126     181       0       0       0       0       0       001010001D    121
     126       0       0       6       0                               0D    122
     126     187       0       0       0       0       0       001010001D    123
     126       0       0       6       0                               0D    124
     126     193       0       0       0       0       0       001010001D    125
     126       0       0       6       0                               0D    126
     126     199       0       0       0       0       0       001010001D    127
     126       0       0       5       0                               0D    128
     126     204       0       0       0       0       0       001010001D    129
     126       0       0       5       0                               0D    130
     126     209       0       0       0       0       0       001010001D    131
     126       0       0       5       0                               0D    132
     126     214       0       0       0       0       0       001010001D    133
     126       0       0       6       0                               0D    134
     126     220       0       0       0       0       0       001010001D    135
     126       0       0       5       0                               0D    136
     126     225       0       0       0       0       0       001010001D    137
     126       0       0       5       0                               0D    138
     126     230       0       0       0       0       0       001010001D    139
     126       0       0       6       0                               0D    140
     126     236       0       0       0       0       0       001010001D    141
     126       0       0       8       0                               0D    142
     126     244       0       0       0       0       0       001010001D    143
     126       0       0       5       0                               0D    144
     126     249       0       0       0       0       0       001010001D    145
     126       0       0       6       0                               0D    146
     126     255       0       0       0       0       0       001010001D    147
     126       0       0       6       0                               0D    148
     110     261       0       0       0       0       0       001010001D    149
     110       0       0       1       0                               0D    150
     124     262       0       0       0       0       0       001020001D    151
     124       0       0       1       0                               0D    152
     100     263       0       0       0       0     151       001010001D    153
     100       0       0       1       0                               0D    154
     110     264       0       0       0       0       0       001010001D    155
     110       0       0       1       0                               0D    156
     126     265       0       0       0       0       0       001010001D    157
     126       0       0       5       0                               0D    158
     126     270       0       0       0       0       0       001010001D    159
     126       0       0       6       0                               0D    160
     126     276       0       0       0       0       0       001010001D    161
     126       0       0       7       0                               0D    162
     126     283       0       0       0       0       0       001010001D    163
     126       0       0       5       0                               0D    164
     126     288       0       0       0       0       0       001010001D    165
     126       0       0       6       0                               0D    166
     126     294       0       0       0       0       0       001010001D    167
     126       0       0       6       0                               0D    168
     126     300       0       0       0       0       0       001010001D    169
     126       0       0       5       0                               0D    170
     126     305       0       0       0       0       0       001010001D    171
     126       0       0       5       0                               0D    172
     126     310       0       0       0       0       0       001010001D    173
     126       0       0       5       0                               0D    174
     126     315       0       0       0       0       0       001010001D    175
     126       0       0       6       0                               0D    176
     126     321       0       0       0       0       0       001010001D    177
     126       0       0       5       0                               0D    178
     126     326       0       0       0       0       0       001010001D    179
     126       0       0       5       0                               0D    180
     126     331       0       0       0       0       0       001010001D    181
     126       0       0       5       0                               0D    182
     126     336       0       0       0       0       0       001010001D    183
     126       0       0       6       0                               0D    184
     126     342       0       0       0       0       0       001010001D    185
     126       0       0       6       0                               0D    186
     126     348       0       0       0       0       0       001010001D    187
     126       0       0       6       0                               0D    188
     126     354       0       0       0       0       0       001010001D    189
     126       0       0       5       0                               0D    190
     110     359       0       0       0       0       0       001010001D    191
     110       0       0       1       0                               0D    192
     124     360       0       0       0       0       0       001020001D    193
     124       0       0       1       0                               0D    194
     100     361       0       0       0       0     193       001010001D    195
     100       0       0       1       0                               0D    196
     110     362       0       0       0       0       0       001010001D    197
     110       0       0       1       0                               0D    198
     102     363       0       0       0       0       0       001010001D    199
     102       0       0       3       0                               0D    200
     142     366       0       0       0       0       0       001010001D    201
     142       0       0       1       0                               0D    202
     144     367       0       0   10000       0       0       000000000D    203
     144       0       0       1       0                PartBody       0D    204
     110     368       0       0       0       0       0       001010001D    205
     110       0       0       1       0                               0D    206
     110     369       0       0       0       0       0       001010001D    207
     110       0       0       1       0                               0D    208
     120     370       0       0       0       0       0       001010001D    209
     120       0       0       1       0                               0D    210
     110     371       0       0       0       0       0       001010001D    211
     110       0       0       1       0                               0D    212
     124     372       0       0       0       0       0       001020001D    213
     124       0       0       1       0                               0D    214
     100     373       0       0       0       0     213       001010001D    215
     100       0       0       1       0                               0D    216
     110     374       0       0       0       0       0       001010001D    217
     110       0       0       1       0                               0D    218
     124     375       0       0       0       0       0       001020001D    219
     124       0       0       1       0                               0D    220
     100     376       0       0       0       0     219       001010001D    221
     100       0       0       1       0                               0D    222
     102     377       0       0       0       0       0       001010001D    223
     102       0       0       1       0                               0D    224
     142     378       0       0       0       0       0       001010001D    225
     142       0       0       1       0                               0D    226
     144     379       0       0   10000       0       0       000000000D    227
     144       0       0       1       0                PartBody       0D    228
     110     380       0       0       0       0       0       001010001D    229
     110       0       0       1       0                               0D    230
     110     381       0       0       0       0       0       001010001D    231
     110       0       0       1       0                               0D    232
     120     382       0       0       0       0       0       001010001D    233
     120       0       0       1       0                               0D    234
     110     383       0       0       0       0       0       001010001D    235
     110       0       0       1       0                               0D    236
     124     384       0       0       0       0       0       001020001D    237
     124       0       0       1       0                               0D    238
     100     385       0       0       0       0     237       001010001D    239
     100       0       0       1       0                               0D    240
     110     386       0       0       0       0       0       001010001D    241
     110       0       0       1       0                               0D    242
     124     387       0       0       0       0       0       001020001D    243
     124       0       0       1       0                               0D    244
     100     388       0       0       0       0     243       001010001D    245
     100       0       0       1       0                               0D    246
     102     389       0       0       0       0       0       001010001D    247
     102       0       0       1       0                               0D    248
     142     390       0       0       0       0       0       001010001D    249
     142       0       0       1       0                               0D    250
     144     391       0       0   10000       0       0       000000000D    251
     144       0       0       1       0                PartBody       0D    252
     128     392       0       0       0       0       0       001010001D    253
     128       0       0      20       0                               0D    254
     126     412       0       0       0       0       0       001010001D    255
     126       0       0       7       0                               0D    256
     126     419       0       0       0       0       0       001010001D    257
     126       0       0       5       0                               0D    258
     126     424       0       0       0       0       0       001010001D    259
     126       0       0       7       0                               0D    260
     126     431       0       0       0       0       0       001010001D    261
     126       0       0       5       0                               0D    262
     126     436       0       0       0       0       0       001010001D    263
     126       0       0       5       0                               0D    264
     102     441       0       0       0       0       0       001010001D    265
     102       0       0       1       0                               0D    266
     110     442       0       0       0       0       0       001010501D    267
     110       0       0       1       0                               0D    268
     110     443       0       0       0       0       0       001010501D    269
     110       0       0       1       0                               0D    270
     110     444       0       0       0       0       0       001010501D    271
     110       0       0       1       0                               0D    272
     126     445       0       0       0       0       0       001010501D    273
     126       0       0       7       0                               0D    274
     110     452       0       0       0       0       0       001010501D    275
     110       0       0       1       0                               0D    276
     102     453       0       0       0       0       0       001010501D    277
     102       0       0       1       0                               0D    278
     142     454       0       0       0       0       0       001010001D    279
     142       0       0       1       0                               0D    280
     144     455       0       0   10000       0       0       000000000D    281
     144       0       0       1       0                PartBody       0D    282
     128     456       0       0       0       0       0       001010001D    283
     128       0       0      53       0                               0D    284
     126     509       0       0       0       0       0       001010001D    285
     126       0       0       7       0                               0D    286
     126     516       0       0       0       0       0       001010001D    287
     126       0       0       7       0                               0D    288
     126     523       0       0       0       0       0       001010001D    289
     126       0       0       8       0                               0D    290
     126     531       0       0       0       0       0       001010001D    291
     126       0       0       6       0                               0D    292
     126     537       0       0       0       0       0       001010001D    293
     126       0       0       6       0                               0D    294
     126     543       0       0       0       0       0       001010001D    295
     126       0       0       6       0                               0D    296
     126     549       0       0       0       0       0       001010001D    297
     126       0       0       6       0                               0D    298
     126     555       0       0       0       0       0       001010001D    299
     126       0       0       7       0                               0D    300
     126     562       0       0       0       0       0       001010001D    301
     126       0       0       9       0                               0D    302
     126     571       0       0       0       0       0       001010001D    303
     126       0       0       9       0                               0D    304
     102     580       0       0       0       0       0       001010001D    305
     102       0       0       1       0                               0D    306
     110     581       0       0       0       0       0       001010501D    307
     110       0       0       1       0                               0D    308
     110     582       0       0       0       0       0       001010501D    309
     110       0       0       2       0                               0D    310
     126     584       0       0       0       0       0       001010501D    311
     126       0       0      10       0                               0D    312
     126     594       0       0       0       0       0       001010501D    313
     126       0       0       7       0                               0D    314
     126     601       0       0       0       0       0       001010501D    315
     126       0       0       9       0                               0D    316
     126     610       0       0       0       0       0       001010501D    317
     126       0       0       7       0                               0D    318
     126     617       0       0       0       0       0       001010501D    319
     126       0       0       9       0                               0D    320
     110     626       0       0       0       0       0       001010501D    321
     110       0       0       1       0                               0D    322
     110     627       0       0       0       0       0       001010501D    323
     110       0       0       1       0                               0D    324
     110     628       0       0       0       0       0       001010501D    325
     110       0       0       1       0                               0D    326
     102     629       0       0       0       0       0       001010501D    327
     102       0       0       1       0                               0D    328
     142     630       0       0       0       0       0       001010001D    329
     142       0       0       1       0                               0D    330
     144     631       0       0   10000       0       0       000000000D    331
     144       0       0       1       0                PartBody       0D    332
     128     632       0       0       0       0       0       001010001D    333
     128       0       0      20       0                               0D    334
     126     652       0       0       0       0       0       001010001D    335
     126       0       0       5       0                               0D    336
     126     657       0       0       0       0       0       001010001D    337
     126       0       0       7       0                               0D    338
     126     664       0       0       0       0       0       001010001D    339
     126       0       0       5       0                               0D    340
     126     669       0       0       0       0       0       001010001D    341
     126       0       0       7       0                               0D    342
     102     676       0       0       0       0       0       001010001D    343
     102       0       0       1       0                               0D    344
     126     677       0       0       0       0       0       001010501D    345
     126       0       0       5       0                               0D    346
     110     682       0       0       0       0       0       001010501D    347
     110       0       0       1       0                               0D    348
     110     683       0       0       0       0       0       001010501D    349
     110       0       0       1       0                               0D    350
     110     684       0       0       0       0       0       001010501D    351
     110       0       0       1       0                               0D    352
     102     685       0       0       0       0       0       001010501D    353
     102       0       0       1       0                               0D    354
     142     686       0       0       0       0       0       001010001D    355
     142       0       0       1       0                               0D    356
     144     687       0       0   10000       0       0       000000000D    357
     144       0       0       1       0                PartBody       0D    358
     128     688       0       0       0       0       0       001010001D    359
     128       0       0      20       0                               0D    360
     126     708       0       0       0       0       0       001010001D    361
     126       0       0       5       0                               0D    362
     126     713       0       0       0       0       0       001010001D    363
     126       0       0       7       0                               0D    364
     126     720       0       0       0       0       0       001010001D    365
     126       0       0       5       0                               0D    366
     126     725       0       0       0       0       0       001010001D    367
     126       0       0       7       0                               0D    368
     102     732       0       0       0       0       0       001010001D    369
     102       0       0       1       0                               0D    370
     126     733       0       0       0       0       0       001010501D    371
     126       0       0       5       0                               0D    372
     110     738       0       0       0       0       0       001010501D    373
     110       0       0       1       0                               0D    374
     110     739       0       0       0       0       0       001010501D    375
     110       0       0       1       0                               0D    376
     110     740       0       0       0       0       0       001010501D    377
     110       0       0       1       0                               0D    378
     102     741       0       0       0       0       0       001010501D    379
     102       0       0       1       0                               0D    380
     142     742       0       0       0       0       0       001010001D    381
     142       0       0       1       0                               0D    382
     144     743       0       0   10000       0       0       000000000D    383
     144       0       0       1       0                PartBody       0D    384
     128     744       0       0       0       0       0       001010001D    385
     128       0       0      40       0                               0D    386
     126     784       0       0       0       0       0       001010001D    387
     126       0       0       9       0                               0D    388
     126     793       0       0       0       0       0       001010001D    389
     126       0       0       7       0                               0D    390
     126     800       0       0       0       0       0       001010001D    391
     126       0       0       6       0                               0D    392
     126     806       0       0       0       0       0       001010001D    393
     126       0       0       9       0                               0D    394
     126     815       0       0       0       0       0       001010001D    395
     126       0       0       7       0                               0D    396
     102     822       0       0       0       0       0       001010001D    397
     102       0       0       1       0                               0D    398
     126     823       0       0       0       0       0       001010501D    399
     126       0       0       7       0                               0D    400
     110     830       0       0       0       0       0       001010501D    401
     110       0       0       1       0                               0D    402
     110     831       0       0       0       0       0       001010501D    403
     110       0       0       1       0                               0D    404
     110     832       0       0       0       0       0       001010501D    405
     110       0       0       1       0                               0D    406
     110     833       0       0       0       0       0       001010501D    407
     110       0       0       1       0                               0D    408
     102     834       0       0       0       0       0       001010501D    409
     102       0       0       1       0                               0D    410
     142     835       0       0       0       0       0       001010001D    411
     142       0       0       1       0                               0D    412
     144     836       0       0   10000       0       0       000000000D    413
     144       0       0       1       0                PartBody       0D    414
     128     837       0       0       0       0       0       001010001D    415
     128       0       0      19       0                               0D    416
     126     856       0       0       0       0       0       001010001D    417
     126       0       0       7       0                               0D    418
     126     863       0       0       0       0       0       001010001D    419
     126       0       0       4       0                               0D    420
     126     867       0       0       0       0       0       001010001D    421
     126       0       0       7       0                               0D    422
     126     874       0       0       0       0       0       001010001D    423
     126       0       0       5       0                               0D    424
     102     879       0       0       0       0       0       001010001D    425
     102       0       0       1       0                               0D    426
     110     880       0       0       0       0       0       001010501D    427
     110       0       0       1       0                               0D    428
     110     881       0       0       0       0       0       001010501D    429
     110       0       0       1       0                               0D    430
     110     882       0       0       0       0       0       001010501D    431
     110       0       0       1       0                               0D    432
     126     883       0       0       0       0       0       001010501D    433
     126       0       0       7       0                               0D    434
     102     890       0       0       0       0       0       001010501D    435
     102       0       0       1       0                               0D    436
     142     891       0       0       0       0       0       001010001D    437
     142       0       0       1       0                               0D    438
     144     892       0       0   10000       0       0       000000000D    439
     144       0       0       1       0                PartBody       0D    440
     128     893       0       0       0       0       0       001010001D    441
     128       0       0      53       0                               0D    442
     126     946       0       0       0       0       0       001010001D    443
     126       0       0      30       0                               0D    444
     126     976       0       0       0       0       0       001010001D    445
     126       0       0       3       0                               0D    446
     126     979       0       0       0       0       0       001010001D    447
     126       0       0      30       0                               0D    448
     126    1009       0       0       0       0       0       001010001D    449
     126       0       0       3       0                               0D    450
     102    1012       0       0       0       0       0       001010001D    451
     102       0       0       1       0                               0D    452
     110    1013       0       0       0       0       0       001010501D    453
     110       0       0       1       0                               0D    454
     110    1014       0       0       0       0       0       001010501D    455
     110       0       0       1       0                               0D    456
     110    1015       0       0       0       0       0       001010501D    457
     110       0       0       1       0                               0D    458
     110    1016       0       0       0       0       0       001010501D    459
     110       0       0       2       0                               0D    460
     102    1018       0       0       0       0       0       001010501D    461
     102       0       0       1       0                               0D    462
     142    1019       0       0       0       0       0       001010001D    463
     142       0       0       1       0                               0D    464
     144    1020       0       0   10000       0       0       000000000D    465
     144       0       0       1       0                PartBody       0D    466
     128    1021       0       0       0       0       0       001010001D    467
     128       0       0     125       0                               0D    468
     126    1146       0       0       0       0       0       001010001D    469
     126       0       0      30       0                               0D    470
     126    1176       0       0       0       0       0       001010001D    471
     126       0       0       6       0                               0D    472
     126    1182       0       0       0       0       0       001010001D    473
     126       0       0      30       0                               0D    474
     126    1212       0       0       0       0       0       001010001D    475
     126       0       0       6       0                               0D    476
     126    1218       0       0       0       0       0       001010001D    477
     126       0       0       5       0                               0D    478
     102    1223       0       0       0       0       0       001010001D    479
     102       0       0       1       0                               0D    480
     110    1224       0       0       0       0       0       001010501D    481
     110       0       0       1       0                               0D    482
     110    1225       0       0       0       0       0       001010501D    483
     110       0       0       1       0                               0D    484
     110    1226       0       0       0       0       0       001010501D    485
     110       0       0       1       0                               0D    486
     110    1227       0       0       0       0       0       001010501D    487
     110       0       0       1       0                               0D    488
     110    1228       0       0       0       0       0       001010501D    489
     110       0       0       1       0                               0D    490
     102    1229       0       0       0       0       0       001010501D    491
     102       0       0       1       0                               0D    492
     142    1230       0       0       0       0       0       001010001D    493
     142       0       0       1       0                               0D    494
     144    1231       0       0   10000       0       0       000000000D    495
     144       0       0       1       0                PartBody       0D    496
     128    1232       0       0       0       0       0       001010001D    497
     128       0       0      54       0                               0D    498
     126    1286       0       0       0       0       0       001010001D    499
     126       0       0      30       0                               0D    500
     126    1316       0       0       0       0       0       001010001D    501
     126       0       0       4       0                               0D    502
     126    1320       0       0       0       0       0       001010001D    503
     126       0       0      30       0                               0D    504
     126    1350       0       0       0       0       0       001010001D    505
     126       0       0       3       0                               0D    506
     102    1353       0       0       0       0       0       001010001D    507
     102       0       0       1       0                               0D    508
     110    1354       0       0       0       0       0       001010501D    509
     110       0       0       1       0                               0D    510
     110    1355       0       0       0       0       0       001010501D    511
     110       0       0       1       0                               0D    512
     110    1356       0       0       0       0       0       001010501D    513
     110       0       0       1       0                               0D    514
     110    1357       0       0       0       0       0       001010501D    515
     110       0       0       2       0                               0D    516
     102    1359       0       0       0       0       0       001010501D    517
     102       0       0       1       0                               0D    518
     142    1360       0       0       0       0       0       001010001D    519
     142       0       0       1       0                               0D    520
     144    1361       0       0   10000       0       0       000000000D    521
     144       0       0       1       0                PartBody       0D    522
     128    1362       0       0       0       0       0       001010001D    523
     128       0       0      99       0                               0D    524
     126    1461       0       0       0       0       0       001010001D    525
     126       0       0      30       0                               0D    526
     126    1491       0       0       0       0       0       001010001D    527
     126       0       0       5       0                               0D    528
     126    1496       0       0       0       0       0       001010001D    529
     126       0       0      30       0                               0D    530
     126    1526       0       0       0       0       0       001010001D    531
     126       0       0       5       0                               0D    532
     102    1531       0       0       0       0       0       001010001D    533
     102       0       0       1       0                               0D    534
     110    1532       0       0       0       0       0       001010501D    535
     110       0       0       1       0                               0D    536
     110    1533       0       0       0       0       0       001010501D    537
     110       0       0       1       0                               0D    538
     110    1534       0       0       0       0       0       001010501D    539
     110       0       0       1       0                               0D    540
     110    1535       0       0       0       0       0       001010501D    541
     110       0       0       1       0                               0D    542
     102    1536       0       0       0       0       0       001010501D    543
     102       0       0       1       0                               0D    544
     142    1537       0       0       0       0       0       001010001D    545
     142       0       0       1       0                               0D    546
     144    1538       0       0   10000       0       0       000000000D    547
     144       0       0       1       0                PartBody       0D    548
     128    1539       0       0       0       0       0       001010001D    549
     128       0       0     124       0                               0D    550
     126    1663       0       0       0       0       0       001010001D    551
     126       0       0      30       0                               0D    552
     126    1693       0       0       0       0       0       001010001D    553
     126       0       0       6       0                               0D    554
     126    1699       0       0       0       0       0       001010001D    555
     126       0       0      31       0                               0D    556
     126    1730       0       0       0       0       0       001010001D    557
     126       0       0       6       0                               0D    558
     126    1736       0       0       0       0       0       001010001D    559
     126       0       0       5       0                               0D    560
     102    1741       0       0       0       0       0       001010001D    561
     102       0       0       1       0                               0D    562
     110    1742       0       0       0       0       0       001010501D    563
     110       0       0       1       0                               0D    564
     110    1743       0       0       0       0       0       001010501D    565
     110       0       0       1       0                               0D    566
     110    1744       0       0       0       0       0       001010501D    567
     110       0       0       1       0                               0D    568
     110    1745       0       0       0       0       0       001010501D    569
     110       0       0       1       0                               0D    570
     110    1746       0       0       0       0       0       001010501D    571
     110       0       0       1       0                               0D    572
     102    1747       0       0       0       0       0       001010501D    573
     102       0       0       1       0                               0D    574
     142    1748       0       0       0       0       0       001010001D    575
     142       0       0       1       0                               0D    576
     144    1749       0       0   10000       0       0       000000000D    577
     144       0       0       1       0                PartBody       0D    578
     128    1750       0       0       0       0       0       001010001D    579
     128       0       0      97       0                               0D    580
     126    1847       0       0       0       0       0       001010001D    581
     126       0       0      30       0                               0D    582
     126    1877       0       0       0       0       0       001010001D    583
     126       0       0       5       0                               0D    584
     126    1882       0       0       0       0       0       001010001D    585
     126       0       0      30       0                               0D    586
     126    1912       0       0       0       0       0       001010001D    587
     126       0       0       5       0                               0D    588
     102    1917       0       0       0       0       0       001010001D    589
     102       0       0       1       0                               0D    590
     110    1918       0       0       0       0       0       001010501D    591
     110       0       0       1       0                               0D    592
     110    1919       0       0       0       0       0       001010501D    593
     110       0       0       1       0                               0D    594
     110    1920       0       0       0       0       0       001010501D    595
     110       0       0       1       0                               0D    596
     110    1921       0       0       0       0       0       001010501D    597
     110       0       0       2       0                               0D    598
     102    1923       0       0       0       0       0       001010501D    599
     102       0       0       1       0                               0D    600
     142    1924       0       0       0       0       0       001010001D    601
     142       0       0       1       0                               0D    602
     144    1925       0       0   10000       0       0       000000000D    603
     144       0       0       1       0                PartBody       0D    604
     108    1926       0       0       0       0       0       001010001D    605
     108       0       0       2       0                               0D    606
     110    1928       0       0       0       0       0       001010001D    607
     110       0       0       2       0                               0D    608
     126    1930       0       0       0       0       0       001010001D    609
     126       0       0       9       0                               0D    610
     126    1939       0       0       0       0       0       001010001D    611
     126       0       0       6       0                               0D    612
     126    1945       0       0       0       0       0       001010001D    613
     126       0       0       9       0                               0D    614
     110    1954       0       0       0       0       0       001010001D    615
     110       0       0       2       0                               0D    616
     126    1956       0       0       0       0       0       001010001D    617
     126       0       0       6       0                               0D    618
     102    1962       0       0       0       0       0       001010001D    619
     102       0       0       1       0                               0D    620
     142    1963       0       0       0       0       0       001010001D    621
     142       0       0       1       0                               0D    622
     144    1964       0       0   10000       0       0       000000000D    623
     144       0       0       1       0                PartBody       0D    624
     110    1965       0       0       0       0       0       001010001D    625
     110       0       0       1       0                               0D    626
     110    1966       0       0       0       0       0       001010001D    627
     110       0       0       2       0                               0D    628
     120    1968       0       0       0       0       0       001010001D    629
     120       0       0       1       0                               0D    630
     126    1969       0       0       0       0       0       001010001D    631
     126       0       0       5       0                               0D    632
     126    1974       0       0       0       0       0       001010001D    633
     126       0       0       5       0                               0D    634
     110    1979       0       0       0       0       0       001010001D    635
     110       0       0       1       0                               0D    636
     102    1980       0       0       0       0       0       001010001D    637
     102       0       0       1       0                               0D    638
     142    1981       0       0       0       0       0       001010001D    639
     142       0       0       1       0                               0D    640
     144    1982       0       0   10000       0       0       000000000D    641
     144       0       0       1       0                PartBody       0D    642
     110    1983       0       0       0       0       0       001010001D    643
     110       0       0       1       0                               0D    644
     110    1984       0       0       0       0       0       001010001D    645
     110       0       0       2       0                               0D    646
     120    1986       0       0       0       0       0       001010001D    647
     120       0       0       1       0                               0D    648
     126    1987       0       0       0       0       0       001010001D    649
     126       0       0       6       0                               0D    650
     110    1993       0       0       0       0       0       001010001D    651
     110       0       0       1       0                               0D    652
     126    1994       0       0       0       0       0       001010001D    653
     126       0       0       5       0                               0D    654
     126    1999       0       0       0       0       0       001010001D    655
     126       0       0       4       0                               0D    656
     102    2003       0       0       0       0       0       001010001D    657
     102       0       0       1       0                               0D    658
     142    2004       0       0       0       0       0       001010001D    659
     142       0       0       1       0                               0D    660
     144    2005       0       0   10000       0       0       000000000D    661
     144       0       0       1       0                PartBody       0D    662
     110    2006       0       0       0       0       0       001010001D    663
     110       0       0       1       0                               0D    664
     110    2007       0       0       0       0       0       001010001D    665
     110       0       0       2       0                               0D    666
     120    2009       0       0       0       0       0       001010001D    667
     120       0       0       1       0                               0D    668
     126    2010       0       0       0       0       0       001010001D    669
     126       0       0      14       0                               0D    670
     126    2024       0       0       0       0       0       001010001D    671
     126       0       0       7       0                               0D    672
     102    2031       0       0       0       0       0       001010001D    673
     102       0       0       1       0                               0D    674
     142    2032       0       0       0       0       0       001010001D    675
     142       0       0       1       0                               0D    676
     144    2033       0       0   10000       0       0       000000000D    677
     144       0       0       1       0                PartBody       0D    678
     110    2034       0       0       0       0       0       001010001D    679
     110       0       0       1       0                               0D    680
     110    2035       0       0       0       0       0       001010001D    681
     110       0       0       2       0                               0D    682
     120    2037       0       0       0       0       0       001010001D    683
     120       0       0       1       0                               0D    684
     126    2038       0       0       0       0       0       001010001D    685
     126       0       0       5       0                               0D    686
     126    2043       0       0       0       0       0       001010001D    687
     126       0       0      18       0                               0D    688
     126    2061       0       0       0       0       0       001010001D    689
     126       0       0       6       0                               0D    690
     126    2067       0       0       0       0       0       001010001D    691
     126       0       0      16       0                               0D    692
     102    2083       0       0       0       0       0       001010001D    693
     102       0       0       1       0                               0D    694
     142    2084       0       0       0       0       0       001010001D    695
     142       0       0       1       0                               0D    696
     144    2085       0       0   10000       0       0       000000000D    697
     144       0       0       1       0                PartBody       0D    698
     110    2086       0       0       0       0       0       001010001D    699
     110       0       0       1       0                               0D    700
     110    2087       0       0       0       0       0       001010001D    701
     110       0       0       2       0                               0D    702
     120    2089       0       0       0       0       0       001010001D    703
     120       0       0       1       0                               0D    704
     126    2090       0       0       0       0       0       001010001D    705
     126       0       0      15       0                               0D    706
     126    2105       0       0       0       0       0       001010001D    707
     126       0       0       7       0                               0D    708
     102    2112       0       0       0       0       0       001010001D    709
     102       0       0       1       0                               0D    710
     142    2113       0       0       0       0       0       001010001D    711
     142       0       0       1       0                               0D    712
     144    2114       0       0   10000       0       0       000000000D    713
     144       0       0       1       0                PartBody       0D    714
     110    2115       0       0       0       0       0       001010001D    715
     110       0       0       1       0                               0D    716
     110    2116       0       0       0       0       0       001010001D    717
     110       0       0       2       0                               0D    718
     120    2118       0       0       0       0       0       001010001D    719
     120       0       0       1       0                               0D    720
     126    2119       0       0       0       0       0       001010001D    721
     126       0       0       9       0                               0D    722
     126    2128       0       0       0       0       0       001010001D    723
     126       0       0       6       0                               0D    724
     126    2134       0       0       0       0       0       001010001D    725
     126       0       0       5       0                               0D    726
     102    2139       0       0       0       0       0       001010001D    727
     102       0       0       1       0                               0D    728
     142    2140       0       0       0       0       0       001010001D    729
     142       0       0       1       0                               0D    730
     144    2141       0       0   10000       0       0       000000000D    731
     144       0       0       1       0                PartBody       0D    732
     110    2142       0       0       0       0       0       001010001D    733
     110       0       0       1       0                               0D    734
     110    2143       0       0       0       0       0       001010001D    735
     110       0       0       2       0                               0D    736
     120    2145       0       0       0       0       0       001010001D    737
     120       0       0       1       0                               0D    738
     126    2146       0       0       0       0       0       001010001D    739
     126       0       0       7       0                               0D    740
     126    2153       0       0       0       0       0       001010001D    741
     126       0       0       6       0                               0D    742
     102    2159       0       0       0       0       0       001010001D    743
     102       0       0       1       0                               0D    744
     142    2160       0       0       0       0       0       001010001D    745
     142       0       0       1       0                               0D    746
     144    2161       0       0   10000       0       0       000000000D    747
     144       0       0       1       0                PartBody       0D    748
     110    2162       0       0       0       0       0       001010001D    749
     110       0       0       1       0                               0D    750
     110    2163       0       0       0       0       0       001010001D    751
     110       0       0       2       0                               0D    752
     120    2165       0       0       0       0       0       001010001D    753
     120       0       0       1       0                               0D    754
     126    2166       0       0       0       0       0       001010001D    755
     126       0       0      20       0                               0D    756
     126    2186       0       0       0       0       0       001010001D    757
     126       0       0       5       0                               0D    758
     126    2191       0       0       0       0       0       001010001D    759
     126       0       0      18       0                               0D    760
     126    2209       0       0       0       0       0       001010001D    761
     126       0       0       6       0                               0D    762
     102    2215       0       0       0       0       0       001010001D    763
     102       0       0       1       0                               0D    764
     142    2216       0       0       0       0       0       001010001D    765
     142       0       0       1       0                               0D    766
     144    2217       0       0   10000       0       0       000000000D    767
     144       0       0       1       0                PartBody       0D    768
     110    2218       0       0       0       0       0       001010001D    769
     110       0       0       1       0                               0D    770
     110    2219       0       0       0       0       0       001010001D    771
     110       0       0       2       0                               0D    772
     120    2221       0       0       0       0       0       001010001D    773
     120       0       0       1       0                               0D    774
     126    2222       0       0       0       0       0       001010001D    775
     126       0       0       7       0                               0D    776
     126    2229       0       0       0       0       0       001010001D    777
     126       0       0       6       0                               0D    778
     102    2235       0       0       0       0       0       001010001D    779
     102       0       0       1       0                               0D    780
     142    2236       0       0       0       0       0       001010001D    781
     142       0       0       1       0                               0D    782
     144    2237       0       0   10000       0       0       000000000D    783
     144       0       0       1       0                PartBody       0D    784
     128    2238       0       0       0       0       0       001010001D    785
     128       0       0     111       0                               0D    786
     126    2349       0       0       0       0       0       001010001D    787
     126       0       0      34       0                               0D    788
     126    2383       0       0       0       0       0       001010001D    789
     126       0       0       6       0                               0D    790
     126    2389       0       0       0       0       0       001010001D    791
     126       0       0      34       0                               0D    792
     126    2423       0       0       0       0       0       001010001D    793
     126       0       0       5       0                               0D    794
     102    2428       0       0       0       0       0       001010001D    795
     102       0       0       1       0                               0D    796
     110    2429       0       0       0       0       0       001010501D    797
     110       0       0       1       0                               0D    798
     110    2430       0       0       0       0       0       001010501D    799
     110       0       0       1       0                               0D    800
     110    2431       0       0       0       0       0       001010501D    801
     110       0       0       1       0                               0D    802
     110    2432       0       0       0       0       0       001010501D    803
     110       0       0       1       0                               0D    804
     102    2433       0       0       0       0       0       001010501D    805
     102       0       0       1       0                               0D    806
     142    2434       0       0       0       0       0       001010001D    807
     142       0       0       1       0                               0D    808
     144    2435       0       0   10000       0       0       000000000D    809
     144       0       0       1       0                PartBody       0D    810
     128    2436       0       0       0       0       0       001010001D    811
     128       0       0     135       0                               0D    812
     126    2571       0       0       0       0       0       001010001D    813
     126       0       0      32       0                               0D    814
     126    2603       0       0       0       0       0       001010001D    815
     126       0       0       7       0                               0D    816
     126    2610       0       0       0       0       0       001010001D    817
     126       0       0      34       0                               0D    818
     126    2644       0       0       0       0       0       001010001D    819
     126       0       0       6       0                               0D    820
     126    2650       0       0       0       0       0       001010001D    821
     126       0       0       6       0                               0D    822
     102    2656       0       0       0       0       0       001010001D    823
     102       0       0       1       0                               0D    824
     110    2657       0       0       0       0       0       001010501D    825
     110       0       0       1       0                               0D    826
     110    2658       0       0       0       0       0       001010501D    827
     110       0       0       1       0                               0D    828
     110    2659       0       0       0       0       0       001010501D    829
     110       0       0       1       0                               0D    830
     110    2660       0       0       0       0       0       001010501D    831
     110       0       0       1       0                               0D    832
     110    2661       0       0       0       0       0       001010501D    833
     110       0       0       1       0                               0D    834
     102    2662       0       0       0       0       0       001010501D    835
     102       0       0       1       0                               0D    836
     142    2663       0       0       0       0       0       001010001D    837
     142       0       0       1       0                               0D    838
     144    2664       0       0   10000       0       0       000000000D    839
     144       0       0       1       0                PartBody       0D    840
     108    2665       0       0       0       0       0       001010001D    841
     108       0       0       2       0                               0D    842
     110    2667       0       0       0       0       0       001010001D    843
     110       0       0       2       0                               0D    844
     126    2669       0       0       0       0       0       001010001D    845
     126       0       0      11       0                               0D    846
     126    2680       0       0       0       0       0       001010001D    847
     126       0       0       7       0                               0D    848
     126    2687       0       0       0       0       0       001010001D    849
     126       0       0      11       0                               0D    850
     110    2698       0       0       0       0       0       001010001D    851
     110       0       0       2       0                               0D    852
     126    2700       0       0       0       0       0       001010001D    853
     126       0       0       7       0                               0D    854
     102    2707       0       0       0       0       0       001010001D    855
     102       0       0       1       0                               0D    856
     142    2708       0       0       0       0       0       001010001D    857
     142       0       0       1       0                               0D    858
     144    2709       0       0   10000       0       0       000000000D    859
     144       0       0       1       0                PartBody       0D    860
     128    2710       0       0       0       0       0       001010001D    861
     128       0       0      59       0                               0D    862
     126    2769       0       0       0       0       0       001010001D    863
     126       0       0      34       0                               0D    864
     126    2803       0       0       0       0       0       001010001D    865
     126       0       0       4       0                               0D    866
     126    2807       0       0       0       0       0       001010001D    867
     126       0       0      33       0                               0D    868
     126    2840       0       0       0       0       0       001010001D    869
     126       0       0       3       0                               0D    870
     102    2843       0       0       0       0       0       001010001D    871
     102       0       0       1       0                               0D    872
     110    2844       0       0       0       0       0       001010501D    873
     110       0       0       1       0                               0D    874
     110    2845       0       0       0       0       0       001010501D    875
     110       0       0       1       0                               0D    876
     110    2846       0       0       0       0       0       001010501D    877
     110       0       0       1       0                               0D    878
     110    2847       0       0       0       0       0       001010501D    879
     110       0       0       2       0                               0D    880
     102    2849       0       0       0       0       0       001010501D    881
     102       0       0       1       0                               0D    882
     142    2850       0       0       0       0       0       001010001D    883
     142       0       0       1       0                               0D    884
     144    2851       0       0   10000       0       0       000000000D    885
     144       0       0       1       0                PartBody       0D    886
     128    2852       0       0       0       0       0       001010001D    887
     128       0       0      22       0                               0D    888
     126    2874       0       0       0       0       0       001010001D    889
     126       0       0       5       0                               0D    890
     126    2879       0       0       0       0       0       001010001D    891
     126       0       0       6       0                               0D    892
     126    2885       0       0       0       0       0       001010001D    893
     126       0       0       7       0                               0D    894
     126    2892       0       0       0       0       0       001010001D    895
     126       0       0       5       0                               0D    896
     126    2897       0       0       0       0       0       001010001D    897
     126       0       0       7       0                               0D    898
     102    2904       0       0       0       0       0       001010001D    899
     102       0       0       1       0                               0D    900
     126    2905       0       0       0       0       0       001010501D    901
     126       0       0       6       0                               0D    902
     126    2911       0       0       0       0       0       001010501D    903
     126       0       0       6       0                               0D    904
     110    2917       0       0       0       0       0       001010501D    905
     110       0       0       1       0                               0D    906
     110    2918       0       0       0       0       0       001010501D    907
     110       0       0       1       0                               0D    908
     110    2919       0       0       0       0       0       001010501D    909
     110       0       0       1       0                               0D    910
     102    2920       0       0       0       0       0       001010501D    911
     102       0       0       1       0                               0D    912
     142    2921       0       0       0       0       0       001010001D    913
     142       0       0       1       0                               0D    914
     144    2922       0       0   10000       0       0       000000000D    915
     144       0       0       1       0                PartBody       0D    916
     128    2923       0       0       0       0       0       001010001D    917
     128       0       0     103       0                               0D    918
     126    3026       0       0       0       0       0       001010001D    919
     126       0       0      32       0                               0D    920
     126    3058       0       0       0       0       0       001010001D    921
     126       0       0       6       0                               0D    922
     126    3064       0       0       0       0       0       001010001D    923
     126       0       0      32       0                               0D    924
     126    3096       0       0       0       0       0       001010001D    925
     126       0       0       5       0                               0D    926
     102    3101       0       0       0       0       0       001010001D    927
     102       0       0       1       0                               0D    928
     110    3102       0       0       0       0       0       001010501D    929
     110       0       0       1       0                               0D    930
     110    3103       0       0       0       0       0       001010501D    931
     110       0       0       1       0                               0D    932
     110    3104       0       0       0       0       0       001010501D    933
     110       0       0       1       0                               0D    934
     110    3105       0       0       0       0       0       001010501D    935
     110       0       0       2       0                               0D    936
     102    3107       0       0       0       0       0       001010501D    937
     102       0       0       1       0                               0D    938
     142    3108       0       0       0       0       0       001010001D    939
     142       0       0       1       0                               0D    940
     144    3109       0       0   10000       0       0       000000000D    941
     144       0       0       1       0                PartBody       0D    942
     128    3110       0       0       0       0       0       001010001D    943
     128       0       0      44       0                               0D    944
     126    3154       0       0       0       0       0       001010001D    945
     126       0       0       5       0                               0D    946
     126    3159       0       0       0       0       0       001010001D    947
     126       0       0       7       0                               0D    948
     126    3166       0       0       0       0       0       001010001D    949
     126       0       0       7       0                               0D    950
     126    3173       0       0       0       0       0       001010001D    951
     126       0       0       6       0                               0D    952
     126    3179       0       0       0       0       0       001010001D    953
     126       0       0       6       0                               0D    954
     126    3185       0       0       0       0       0       001010001D    955
     126       0       0       7       0                               0D    956
     126    3192       0       0       0       0       0       001010001D    957
     126       0       0       7       0                               0D    958
     126    3199       0       0       0       0       0       001010001D    959
     126       0       0      10       0                               0D    960
     126    3209       0       0       0       0       0       001010001D    961
     126       0       0       7       0                               0D    962
     102    3216       0       0       0       0       0       001010001D    963
     102       0       0       1       0                               0D    964
     126    3217       0       0       0       0       0       001010501D    965
     126       0       0       5       0                               0D    966
     126    3222       0       0       0       0       0       001010501D    967
     126       0       0       8       0                               0D    968
     126    3230       0       0       0       0       0       001010501D    969
     126       0       0       6       0                               0D    970
     126    3236       0       0       0       0       0       001010501D    971
     126       0       0       6       0                               0D    972
     126    3242       0       0       0       0       0       001010501D    973
     126       0       0       6       0                               0D    974
     110    3248       0       0       0       0       0       001010501D    975
     110       0       0       1       0                               0D    976
     110    3249       0       0       0       0       0       001010501D    977
     110       0       0       1       0                               0D    978
     110    3250       0       0       0       0       0       001010501D    979
     110       0       0       1       0                               0D    980
     110    3251       0       0       0       0       0       001010501D    981
     110       0       0       1       0                               0D    982
     102    3252       0       0       0       0       0       001010501D    983
     102       0       0       1       0                               0D    984
     142    3253       0       0       0       0       0       001010001D    985
     142       0       0       1       0                               0D    986
     144    3254       0       0   10000       0       0       000000000D    987
     144       0       0       1       0                PartBody       0D    988
     128    3255       0       0       0       0       0       001010001D    989
     128       0       0     136       0                               0D    990
     126    3391       0       0       0       0       0       001010001D    991
     126       0       0      33       0                               0D    992
     126    3424       0       0       0       0       0       001010001D    993
     126       0       0       7       0                               0D    994
     126    3431       0       0       0       0       0       001010001D    995
     126       0       0      33       0                               0D    996
     126    3464       0       0       0       0       0       001010001D    997
     126       0       0       6       0                               0D    998
     126    3470       0       0       0       0       0       001010001D    999
     126       0       0       7       0                               0D   1000
     102    3477       0       0       0       0       0       001010001D   1001
     102       0       0       1       0                               0D   1002
     110    3478       0       0       0       0       0       001010501D   1003
     110       0       0       1       0                               0D   1004
     110    3479       0       0       0       0       0       001010501D   1005
     110       0       0       1       0                               0D   1006
     110    3480       0       0       0       0       0       001010501D   1007
     110       0       0       1       0                               0D   1008
     110    3481       0       0       0       0       0       001010501D   1009
     110       0       0       1       0                               0D   1010
     110    3482       0       0       0       0       0       001010501D   1011
     110       0       0       1       0                               0D   1012
     102    3483       0       0       0       0       0       001010501D   1013
     102       0       0       1       0                               0D   1014
     142    3484       0       0       0       0       0       001010001D   1015
     142       0       0       1       0                               0D   1016
     144    3485       0       0   10000       0       0       000000000D   1017
     144       0       0       1       0                PartBody       0D   1018
     128    3486       0       0       0       0       0       001010001D   1019
     128       0       0      57       0                               0D   1020
     126    3543       0       0       0       0       0       001010001D   1021
     126       0       0      33       0                               0D   1022
     126    3576       0       0       0       0       0       001010001D   1023
     126       0       0       4       0                               0D   1024
     126    3580       0       0       0       0       0       001010001D   1025
     126       0       0      32       0                               0D   1026
     126    3612       0       0       0       0       0       001010001D   1027
     126       0       0       3       0                               0D   1028
     102    3615       0       0       0       0       0       001010001D   1029
     102       0       0       1       0                               0D   1030
     110    3616       0       0       0       0       0       001010501D   1031
     110       0       0       1       0                               0D   1032
     110    3617       0       0       0       0       0       001010501D   1033
     110       0       0       1       0                               0D   1034
     110    3618       0       0       0       0       0       001010501D   1035
     110       0       0       1       0                               0D   1036
     110    3619       0       0       0       0       0       001010501D   1037
     110       0       0       2       0                               0D   1038
     102    3621       0       0       0       0       0       001010501D   1039
     102       0       0       1       0                               0D   1040
     142    3622       0       0       0       0       0       001010001D   1041
     142       0       0       1       0                               0D   1042
     144    3623       0       0   10000       0       0       000000000D   1043
     144       0       0       1       0                PartBody       0D   1044
     128    3624       0       0       0       0       0       001010001D   1045
     128       0       0      22       0                               0D   1046
     126    3646       0       0       0       0       0       001010001D   1047
     126       0       0       5       0                               0D   1048
     126    3651       0       0       0       0       0       001010001D   1049
     126       0       0       6       0                               0D   1050
     126    3657       0       0       0       0       0       001010001D   1051
     126       0       0       7       0                               0D   1052
     126    3664       0       0       0       0       0       001010001D   1053
     126       0       0       5       0                               0D   1054
     126    3669       0       0       0       0       0       001010001D   1055
     126       0       0       7       0                               0D   1056
     102    3676       0       0       0       0       0       001010001D   1057
     102       0       0       1       0                               0D   1058
     126    3677       0       0       0       0       0       001010501D   1059
     126       0       0       6       0                               0D   1060
     126    3683       0       0       0       0       0       001010501D   1061
     126       0       0       6       0                               0D   1062
     110    3689       0       0       0       0       0       001010501D   1063
     110       0       0       1       0                               0D   1064
     110    3690       0       0       0       0       0       001010501D   1065
     110       0       0       1       0                               0D   1066
     110    3691       0       0       0       0       0       001010501D   1067
     110       0       0       1       0                               0D   1068
     102    3692       0       0       0       0       0       001010501D   1069
     102       0       0       1       0                               0D   1070
     142    3693       0       0       0       0       0       001010001D   1071
     142       0       0       1       0                               0D   1072
     144    3694       0       0   10000       0       0       000000000D   1073
     144       0       0       1       0                PartBody       0D   1074
     128    3695       0       0       0       0       0       001010001D   1075
     128       0       0      21       0                               0D   1076
     126    3716       0       0       0       0       0       001010001D   1077
     126       0       0       7       0                               0D   1078
     126    3723       0       0       0       0       0       001010001D   1079
     126       0       0       5       0                               0D   1080
     126    3728       0       0       0       0       0       001010001D   1081
     126       0       0       7       0                               0D   1082
     126    3735       0       0       0       0       0       001010001D   1083
     126       0       0       6       0                               0D   1084
     126    3741       0       0       0       0       0       001010001D   1085
     126       0       0       5       0                               0D   1086
     102    3746       0       0       0       0       0       001010001D   1087
     102       0       0       1       0                               0D   1088
     110    3747       0       0       0       0       0       001010501D   1089
     110       0       0       1       0                               0D   1090
     110    3748       0       0       0       0       0       001010501D   1091
     110       0       0       1       0                               0D   1092
     110    3749       0       0       0       0       0       001010501D   1093
     110       0       0       1       0                               0D   1094
     126    3750       0       0       0       0       0       001010501D   1095
     126       0       0       7       0                               0D   1096
     126    3757       0       0       0       0       0       001010501D   1097
     126       0       0       7       0                               0D   1098
     102    3764       0       0       0       0       0       001010501D   1099
     102       0       0       1       0                               0D   1100
     142    3765       0       0       0       0       0       001010001D   1101
     142       0       0       1       0                               0D   1102
     144    3766       0       0   10000       0       0       000000000D   1103
     144       0       0       1       0                PartBody       0D   1104
     128    3767       0       0       0       0       0       001010001D   1105
     128       0       0      58       0                               0D   1106
     126    3825       0       0       0       0       0       001010001D   1107
     126       0       0       7       0                               0D   1108
     126    3832       0       0       0       0       0       001010001D   1109
     126       0       0       7       0                               0D   1110
     126    3839       0       0       0       0       0       001010001D   1111
     126       0       0       6       0                               0D   1112
     126    3845       0       0       0       0       0       001010001D   1113
     126       0       0       6       0                               0D   1114
     126    3851       0       0       0       0       0       001010001D   1115
     126       0       0       6       0                               0D   1116
     126    3857       0       0       0       0       0       001010001D   1117
     126       0       0       6       0                               0D   1118
     126    3863       0       0       0       0       0       001010001D   1119
     126       0       0       6       0                               0D   1120
     126    3869       0       0       0       0       0       001010001D   1121
     126       0       0       6       0                               0D   1122
     126    3875       0       0       0       0       0       001010001D   1123
     126       0       0       6       0                               0D   1124
     126    3881       0       0       0       0       0       001010001D   1125
     126       0       0       6       0                               0D   1126
     126    3887       0       0       0       0       0       001010001D   1127
     126       0       0       7       0                               0D   1128
     126    3894       0       0       0       0       0       001010001D   1129
     126       0       0      10       0                               0D   1130
     126    3904       0       0       0       0       0       001010001D   1131
     126       0       0      10       0                               0D   1132
     102    3914       0       0       0       0       0       001010001D   1133
     102       0       0       2       0                               0D   1134
     110    3916       0       0       0       0       0       001010501D   1135
     110       0       0       1       0                               0D   1136
     110    3917       0       0       0       0       0       001010501D   1137
     110       0       0       2       0                               0D   1138
     126    3919       0       0       0       0       0       001010501D   1139
     126       0       0       7       0                               0D   1140
     126    3926       0       0       0       0       0       001010501D   1141
     126       0       0       9       0                               0D   1142
     126    3935       0       0       0       0       0       001010501D   1143
     126       0       0       6       0                               0D   1144
     126    3941       0       0       0       0       0       001010501D   1145
     126       0       0       9       0                               0D   1146
     126    3950       0       0       0       0       0       001010501D   1147
     126       0       0       7       0                               0D   1148
     126    3957       0       0       0       0       0       001010501D   1149
     126       0       0       9       0                               0D   1150
     126    3966       0       0       0       0       0       001010501D   1151
     126       0       0       7       0                               0D   1152
     126    3973       0       0       0       0       0       001010501D   1153
     126       0       0       7       0                               0D   1154
     110    3980       0       0       0       0       0       001010501D   1155
     110       0       0       1       0                               0D   1156
     110    3981       0       0       0       0       0       001010501D   1157
     110       0       0       1       0                               0D   1158
     110    3982       0       0       0       0       0       001010501D   1159
     110       0       0       1       0                               0D   1160
     102    3983       0       0       0       0       0       001010501D   1161
     102       0       0       2       0                               0D   1162
     142    3985       0       0       0       0       0       001010001D   1163
     142       0       0       1       0                               0D   1164
     144    3986       0       0   10000       0       0       000000000D   1165
     144       0       0       1       0                PartBody       0D   1166
     128    3987       0       0       0       0       0       001010001D   1167
     128       0       0      20       0                               0D   1168
     126    4007       0       0       0       0       0       001010001D   1169
     126       0       0       7       0                               0D   1170
     126    4014       0       0       0       0       0       001010001D   1171
     126       0       0       5       0                               0D   1172
     126    4019       0       0       0       0       0       001010001D   1173
     126       0       0       7       0                               0D   1174
     126    4026       0       0       0       0       0       001010001D   1175
     126       0       0       5       0                               0D   1176
     126    4031       0       0       0       0       0       001010001D   1177
     126       0       0       5       0                               0D   1178
     126    4036       0       0       0       0       0       001010001D   1179
     126       0       0       5       0                               0D   1180
     102    4041       0       0       0       0       0       001010001D   1181
     102       0       0       1       0                               0D   1182
     110    4042       0       0       0       0       0       001010501D   1183
     110       0       0       1       0                               0D   1184
     110    4043       0       0       0       0       0       001010501D   1185
     110       0       0       1       0                               0D   1186
     110    4044       0       0       0       0       0       001010501D   1187
     110       0       0       1       0                               0D   1188
     126    4045       0       0       0       0       0       001010501D   1189
     126       0       0       7       0                               0D   1190
     126    4052       0       0       0       0       0       001010501D   1191
     126       0       0       6       0                               0D   1192
     110    4058       0       0       0       0       0       001010501D   1193
     110       0       0       1       0                               0D   1194
     102    4059       0       0       0       0       0       001010501D   1195
     102       0       0       1       0                               0D   1196
     142    4060       0       0       0       0       0       001010001D   1197
     142       0       0       1       0                               0D   1198
     144    4061       0       0   10000       0       0       000000000D   1199
     144       0       0       1       0                PartBody       0D   1200
     128    4062       0       0       0       0       0       001010001D   1201
     128       0       0     196       0                               0D   1202
     126    4258       0       0       0       0       0       001010001D   1203
     126       0       0      21       0                               0D   1204
     126    4279       0       0       0       0       0       001010001D   1205
     126       0       0       5       0                               0D   1206
     126    4284       0       0       0       0       0       001010001D   1207
     126       0       0      19       0                               0D   1208
     126    4303       0       0       0       0       0       001010001D   1209
     126       0       0       6       0                               0D   1210
     102    4309       0       0       0       0       0       001010001D   1211
     102       0       0       1       0                               0D   1212
     126    4310       0       0       0       0       0       001010501D   1213
     126       0       0      23       0                               0D   1214
     126    4333       0       0       0       0       0       001010501D   1215
     126       0       0       6       0                               0D   1216
     126    4339       0       0       0       0       0       001010501D   1217
     126       0       0      20       0                               0D   1218
     126    4359       0       0       0       0       0       001010501D   1219
     126       0       0       7       0                               0D   1220
     102    4366       0       0       0       0       0       001010501D   1221
     102       0       0       1       0                               0D   1222
     142    4367       0       0       0       0       0       001010001D   1223
     142       0       0       1       0                               0D   1224
     144    4368       0       0   10000       0       0       000000000D   1225
     144       0       0       1       0                PartBody       0D   1226
     128    4369       0       0       0       0       0       001010001D   1227
     128       0       0     196       0                               0D   1228
     126    4565       0       0       0       0       0       001010001D   1229
     126       0       0      14       0                               0D   1230
     126    4579       0       0       0       0       0       001010001D   1231
     126       0       0       6       0                               0D   1232
     102    4585       0       0       0       0       0       001010001D   1233
     102       0       0       1       0                               0D   1234
     126    4586       0       0       0       0       0       001010501D   1235
     126       0       0      18       0                               0D   1236
     126    4604       0       0       0       0       0       001010501D   1237
     126       0       0       8       0                               0D   1238
     102    4612       0       0       0       0       0       001010501D   1239
     102       0       0       1       0                               0D   1240
     142    4613       0       0       0       0       0       001010001D   1241
     142       0       0       1       0                               0D   1242
     144    4614       0       0   10000       0       0       000000000D   1243
     144       0       0       1       0                PartBody       0D   1244
     128    4615       0       0       0       0       0       001010001D   1245
     128       0       0     196       0                               0D   1246
     126    4811       0       0       0       0       0       001010001D   1247
     126       0       0       7       0                               0D   1248
     126    4818       0       0       0       0       0       001010001D   1249
     126       0       0       5       0                               0D   1250
     102    4823       0       0       0       0       0       001010001D   1251
     102       0       0       1       0                               0D   1252
     126    4824       0       0       0       0       0       001010501D   1253
     126       0       0       8       0                               0D   1254
     126    4832       0       0       0       0       0       001010501D   1255
     126       0       0       6       0                               0D   1256
     102    4838       0       0       0       0       0       001010501D   1257
     102       0       0       1       0                               0D   1258
     142    4839       0       0       0       0       0       001010001D   1259
     142       0       0       1       0                               0D   1260
     144    4840       0       0   10000       0       0       000000000D   1261
     144       0       0       1       0                PartBody       0D   1262
     128    4841       0       0       0       0       0       001010001D   1263
     128       0       0     196       0                               0D   1264
     126    5037       0       0       0       0       0       001010001D   1265
     126       0       0       7       0                               0D   1266
     126    5044       0       0       0       0       0       001010001D   1267
     126       0       0       6       0                               0D   1268
     126    5050       0       0       0       0       0       001010001D   1269
     126       0       0       5       0                               0D   1270
     102    5055       0       0       0       0       0       001010001D   1271
     102       0       0       1       0                               0D   1272
     126    5056       0       0       0       0       0       001010501D   1273
     126       0       0      11       0                               0D   1274
     126    5067       0       0       0       0       0       001010501D   1275
     126       0       0       6       0                               0D   1276
     126    5073       0       0       0       0       0       001010501D   1277
     126       0       0       8       0                               0D   1278
     102    5081       0       0       0       0       0       001010501D   1279
     102       0       0       1       0                               0D   1280
     142    5082       0       0       0       0       0       001010001D   1281
     142       0       0       1       0                               0D   1282
     144    5083       0       0   10000       0       0       000000000D   1283
     144       0       0       1       0                PartBody       0D   1284
     128    5084       0       0       0       0       0       001010001D   1285
     128       0       0     101       0                               0D   1286
     126    5185       0       0       0       0       0       001010001D   1287
     126       0       0      31       0                               0D   1288
     126    5216       0       0       0       0       0       001010001D   1289
     126       0       0       6       0                               0D   1290
     126    5222       0       0       0       0       0       001010001D   1291
     126       0       0      31       0                               0D   1292
     126    5253       0       0       0       0       0       001010001D   1293
     126       0       0       6       0                               0D   1294
     102    5259       0       0       0       0       0       001010001D   1295
     102       0       0       1       0                               0D   1296
     110    5260       0       0       0       0       0       001010501D   1297
     110       0       0       1       0                               0D   1298
     110    5261       0       0       0       0       0       001010501D   1299
     110       0       0       1       0                               0D   1300
     110    5262       0       0       0       0       0       001010501D   1301
     110       0       0       1       0                               0D   1302
     110    5263       0       0       0       0       0       001010501D   1303
     110       0       0       1       0                               0D   1304
     102    5264       0       0       0       0       0       001010501D   1305
     102       0       0       1       0                               0D   1306
     142    5265       0       0       0       0       0       001010001D   1307
     142       0       0       1       0                               0D   1308
     144    5266       0       0   10000       0       0       000000000D   1309
     144       0       0       1       0                PartBody       0D   1310
     128    5267       0       0       0       0       0       001010001D   1311
     128       0       0     123       0                               0D   1312
     126    5390       0       0       0       0       0       001010001D   1313
     126       0       0      30       0                               0D   1314
     126    5420       0       0       0       0       0       001010001D   1315
     126       0       0       7       0                               0D   1316
     126    5427       0       0       0       0       0       001010001D   1317
     126       0       0      31       0                               0D   1318
     126    5458       0       0       0       0       0       001010001D   1319
     126       0       0       6       0                               0D   1320
     126    5464       0       0       0       0       0       001010001D   1321
     126       0       0       6       0                               0D   1322
     102    5470       0       0       0       0       0       001010001D   1323
     102       0       0       1       0                               0D   1324
     110    5471       0       0       0       0       0       001010501D   1325
     110       0       0       1       0                               0D   1326
     110    5472       0       0       0       0       0       001010501D   1327
     110       0       0       1       0                               0D   1328
     110    5473       0       0       0       0       0       001010501D   1329
     110       0       0       1       0                               0D   1330
     110    5474       0       0       0       0       0       001010501D   1331
     110       0       0       1       0                               0D   1332
     110    5475       0       0       0       0       0       001010501D   1333
     110       0       0       1       0                               0D   1334
     102    5476       0       0       0       0       0       001010501D   1335
     102       0       0       1       0                               0D   1336
     142    5477       0       0       0       0       0       001010001D   1337
     142       0       0       1       0                               0D   1338
     144    5478       0       0   10000       0       0       000000000D   1339
     144       0       0       1       0                PartBody       0D   1340
     108    5479       0       0       0       0       0       001010001D   1341
     108       0       0       2       0                               0D   1342
     110    5481       0       0       0       0       0       001010001D   1343
     110       0       0       2       0                               0D   1344
     126    5483       0       0       0       0       0       001010001D   1345
     126       0       0      10       0                               0D   1346
     126    5493       0       0       0       0       0       001010001D   1347
     126       0       0       7       0                               0D   1348
     126    5500       0       0       0       0       0       001010001D   1349
     126       0       0      10       0                               0D   1350
     110    5510       0       0       0       0       0       001010001D   1351
     110       0       0       2       0                               0D   1352
     126    5512       0       0       0       0       0       001010001D   1353
     126       0       0       7       0                               0D   1354
     102    5519       0       0       0       0       0       001010001D   1355
     102       0       0       1       0                               0D   1356
     142    5520       0       0       0       0       0       001010001D   1357
     142       0       0       1       0                               0D   1358
     144    5521       0       0   10000       0       0       000000000D   1359
     144       0       0       1       0                PartBody       0D   1360
     128    5522       0       0       0       0       0       001010001D   1361
     128       0       0      54       0                               0D   1362
     126    5576       0       0       0       0       0       001010001D   1363
     126       0       0      31       0                               0D   1364
     126    5607       0       0       0       0       0       001010001D   1365
     126       0       0       4       0                               0D   1366
     126    5611       0       0       0       0       0       001010001D   1367
     126       0       0      31       0                               0D   1368
     126    5642       0       0       0       0       0       001010001D   1369
     126       0       0       3       0                               0D   1370
     102    5645       0       0       0       0       0       001010001D   1371
     102       0       0       1       0                               0D   1372
     110    5646       0       0       0       0       0       001010501D   1373
     110       0       0       1       0                               0D   1374
     110    5647       0       0       0       0       0       001010501D   1375
     110       0       0       1       0                               0D   1376
     110    5648       0       0       0       0       0       001010501D   1377
     110       0       0       1       0                               0D   1378
     110    5649       0       0       0       0       0       001010501D   1379
     110       0       0       2       0                               0D   1380
     102    5651       0       0       0       0       0       001010501D   1381
     102       0       0       1       0                               0D   1382
     142    5652       0       0       0       0       0       001010001D   1383
     142       0       0       1       0                               0D   1384
     144    5653       0       0   10000       0       0       000000000D   1385
     144       0       0       1       0                PartBody       0D   1386
     128    5654       0       0       0       0       0       001010001D   1387
     128       0       0      21       0                               0D   1388
     126    5675       0       0       0       0       0       001010001D   1389
     126       0       0       5       0                               0D   1390
     126    5680       0       0       0       0       0       001010001D   1391
     126       0       0       6       0                               0D   1392
     126    5686       0       0       0       0       0       001010001D   1393
     126       0       0       7       0                               0D   1394
     126    5693       0       0       0       0       0       001010001D   1395
     126       0       0       5       0                               0D   1396
     126    5698       0       0       0       0       0       001010001D   1397
     126       0       0       7       0                               0D   1398
     102    5705       0       0       0       0       0       001010001D   1399
     102       0       0       1       0                               0D   1400
     126    5706       0       0       0       0       0       001010501D   1401
     126       0       0       6       0                               0D   1402
     126    5712       0       0       0       0       0       001010501D   1403
     126       0       0       6       0                               0D   1404
     110    5718       0       0       0       0       0       001010501D   1405
     110       0       0       1       0                               0D   1406
     110    5719       0       0       0       0       0       001010501D   1407
     110       0       0       1       0                               0D   1408
     110    5720       0       0       0       0       0       001010501D   1409
     110       0       0       1       0                               0D   1410
     102    5721       0       0       0       0       0       001010501D   1411
     102       0       0       1       0                               0D   1412
     142    5722       0       0       0       0       0       001010001D   1413
     142       0       0       1       0                               0D   1414
     144    5723       0       0   10000       0       0       000000000D   1415
     144       0       0       1       0                PartBody       0D   1416
     128    5724       0       0       0       0       0       001010001D   1417
     128       0       0      98       0                               0D   1418
     126    5822       0       0       0       0       0       001010001D   1419
     126       0       0      31       0                               0D   1420
     126    5853       0       0       0       0       0       001010001D   1421
     126       0       0       6       0                               0D   1422
     126    5859       0       0       0       0       0       001010001D   1423
     126       0       0      30       0                               0D   1424
     126    5889       0       0       0       0       0       001010001D   1425
     126       0       0       5       0                               0D   1426
     102    5894       0       0       0       0       0       001010001D   1427
     102       0       0       1       0                               0D   1428
     110    5895       0       0       0       0       0       001010501D   1429
     110       0       0       1       0                               0D   1430
     110    5896       0       0       0       0       0       001010501D   1431
     110       0       0       1       0                               0D   1432
     110    5897       0       0       0       0       0       001010501D   1433
     110       0       0       1       0                               0D   1434
     110    5898       0       0       0       0       0       001010501D   1435
     110       0       0       2       0                               0D   1436
     102    5900       0       0       0       0       0       001010501D   1437
     102       0       0       1       0                               0D   1438
     142    5901       0       0       0       0       0       001010001D   1439
     142       0       0       1       0                               0D   1440
     144    5902       0       0   10000       0       0       000000000D   1441
     144       0       0       1       0                PartBody       0D   1442
     128    5903       0       0       0       0       0       001010001D   1443
     128       0       0      42       0                               0D   1444
     126    5945       0       0       0       0       0       001010001D   1445
     126       0       0       6       0                               0D   1446
     126    5951       0       0       0       0       0       001010001D   1447
     126       0       0       5       0                               0D   1448
     126    5956       0       0       0       0       0       001010001D   1449
     126       0       0       7       0                               0D   1450
     126    5963       0       0       0       0       0       001010001D   1451
     126       0       0       7       0                               0D   1452
     126    5970       0       0       0       0       0       001010001D   1453
     126       0       0       5       0                               0D   1454
     126    5975       0       0       0       0       0       001010001D   1455
     126       0       0       5       0                               0D   1456
     126    5980       0       0       0       0       0       001010001D   1457
     126       0       0       7       0                               0D   1458
     126    5987       0       0       0       0       0       001010001D   1459
     126       0       0       7       0                               0D   1460
     126    5994       0       0       0       0       0       001010001D   1461
     126       0       0      10       0                               0D   1462
     126    6004       0       0       0       0       0       001010001D   1463
     126       0       0       7       0                               0D   1464
     102    6011       0       0       0       0       0       001010001D   1465
     102       0       0       1       0                               0D   1466
     126    6012       0       0       0       0       0       001010501D   1467
     126       0       0       7       0                               0D   1468
     126    6019       0       0       0       0       0       001010501D   1469
     126       0       0       5       0                               0D   1470
     126    6024       0       0       0       0       0       001010501D   1471
     126       0       0       8       0                               0D   1472
     126    6032       0       0       0       0       0       001010501D   1473
     126       0       0       6       0                               0D   1474
     126    6038       0       0       0       0       0       001010501D   1475
     126       0       0       6       0                               0D   1476
     126    6044       0       0       0       0       0       001010501D   1477
     126       0       0       6       0                               0D   1478
     110    6050       0       0       0       0       0       001010501D   1479
     110       0       0       1       0                               0D   1480
     110    6051       0       0       0       0       0       001010501D   1481
     110       0       0       1       0                               0D   1482
     110    6052       0       0       0       0       0       001010501D   1483
     110       0       0       1       0                               0D   1484
     110    6053       0       0       0       0       0       001010501D   1485
     110       0       0       1       0                               0D   1486
     102    6054       0       0       0       0       0       001010501D   1487
     102       0       0       1       0                               0D   1488
     142    6055       0       0       0       0       0       001010001D   1489
     142       0       0       1       0                               0D   1490
     144    6056       0       0   10000       0       0       000000000D   1491
     144       0       0       1       0                PartBody       0D   1492
     128    6057       0       0       0       0       0       001010001D   1493
     128       0       0     125       0                               0D   1494
     126    6182       0       0       0       0       0       001010001D   1495
     126       0       0      31       0                               0D   1496
     126    6213       0       0       0       0       0       001010001D   1497
     126       0       0       7       0                               0D   1498
     126    6220       0       0       0       0       0       001010001D   1499
     126       0       0      32       0                               0D   1500
     126    6252       0       0       0       0       0       001010001D   1501
     126       0       0       6       0                               0D   1502
     126    6258       0       0       0       0       0       001010001D   1503
     126       0       0       6       0                               0D   1504
     102    6264       0       0       0       0       0       001010001D   1505
     102       0       0       1       0                               0D   1506
     110    6265       0       0       0       0       0       001010501D   1507
     110       0       0       1       0                               0D   1508
     110    6266       0       0       0       0       0       001010501D   1509
     110       0       0       1       0                               0D   1510
     110    6267       0       0       0       0       0       001010501D   1511
     110       0       0       1       0                               0D   1512
     110    6268       0       0       0       0       0       001010501D   1513
     110       0       0       1       0                               0D   1514
     110    6269       0       0       0       0       0       001010501D   1515
     110       0       0       1       0                               0D   1516
     102    6270       0       0       0       0       0       001010501D   1517
     102       0       0       1       0                               0D   1518
     142    6271       0       0       0       0       0       001010001D   1519
     142       0       0       1       0                               0D   1520
     144    6272       0       0   10000       0       0       000000000D   1521
     144       0       0       1       0                PartBody       0D   1522
     128    6273       0       0       0       0       0       001010001D   1523
     128       0       0      55       0                               0D   1524
     126    6328       0       0       0       0       0       001010001D   1525
     126       0       0      32       0                               0D   1526
     126    6360       0       0       0       0       0       001010001D   1527
     126       0       0       4       0                               0D   1528
     126    6364       0       0       0       0       0       001010001D   1529
     126       0       0      31       0                               0D   1530
     126    6395       0       0       0       0       0       001010001D   1531
     126       0       0       3       0                               0D   1532
     102    6398       0       0       0       0       0       001010001D   1533
     102       0       0       1       0                               0D   1534
     110    6399       0       0       0       0       0       001010501D   1535
     110       0       0       1       0                               0D   1536
     110    6400       0       0       0       0       0       001010501D   1537
     110       0       0       1       0                               0D   1538
     110    6401       0       0       0       0       0       001010501D   1539
     110       0       0       1       0                               0D   1540
     110    6402       0       0       0       0       0       001010501D   1541
     110       0       0       2       0                               0D   1542
     102    6404       0       0       0       0       0       001010501D   1543
     102       0       0       1       0                               0D   1544
     142    6405       0       0       0       0       0       001010001D   1545
     142       0       0       1       0                               0D   1546
     144    6406       0       0   10000       0       0       000000000D   1547
     144       0       0       1       0                PartBody       0D   1548
     128    6407       0       0       0       0       0       001010001D   1549
     128       0       0      21       0                               0D   1550
     126    6428       0       0       0       0       0       001010001D   1551
     126       0       0       4       0                               0D   1552
     126    6432       0       0       0       0       0       001010001D   1553
     126       0       0       6       0                               0D   1554
     126    6438       0       0       0       0       0       001010001D   1555
     126       0       0       7       0                               0D   1556
     126    6445       0       0       0       0       0       001010001D   1557
     126       0       0       6       0                               0D   1558
     126    6451       0       0       0       0       0       001010001D   1559
     126       0       0       7       0                               0D   1560
     102    6458       0       0       0       0       0       001010001D   1561
     102       0       0       1       0                               0D   1562
     126    6459       0       0       0       0       0       001010501D   1563
     126       0       0       6       0                               0D   1564
     126    6465       0       0       0       0       0       001010501D   1565
     126       0       0       6       0                               0D   1566
     110    6471       0       0       0       0       0       001010501D   1567
     110       0       0       1       0                               0D   1568
     110    6472       0       0       0       0       0       001010501D   1569
     110       0       0       1       0                               0D   1570
     110    6473       0       0       0       0       0       001010501D   1571
     110       0       0       1       0                               0D   1572
     102    6474       0       0       0       0       0       001010501D   1573
     102       0       0       1       0                               0D   1574
     142    6475       0       0       0       0       0       001010001D   1575
     142       0       0       1       0                               0D   1576
     144    6476       0       0   10000       0       0       000000000D   1577
     144       0       0       1       0                PartBody       0D   1578
     128    6477       0       0       0       0       0       001010001D   1579
     128       0       0      20       0                               0D   1580
     126    6497       0       0       0       0       0       001010001D   1581
     126       0       0       7       0                               0D   1582
     126    6504       0       0       0       0       0       001010001D   1583
     126       0       0       5       0                               0D   1584
     126    6509       0       0       0       0       0       001010001D   1585
     126       0       0       7       0                               0D   1586
     126    6516       0       0       0       0       0       001010001D   1587
     126       0       0       5       0                               0D   1588
     102    6521       0       0       0       0       0       001010001D   1589
     102       0       0       1       0                               0D   1590
     110    6522       0       0       0       0       0       001010501D   1591
     110       0       0       1       0                               0D   1592
     110    6523       0       0       0       0       0       001010501D   1593
     110       0       0       1       0                               0D   1594
     110    6524       0       0       0       0       0       001010501D   1595
     110       0       0       1       0                               0D   1596
     126    6525       0       0       0       0       0       001010501D   1597
     126       0       0       7       0                               0D   1598
     102    6532       0       0       0       0       0       001010501D   1599
     102       0       0       1       0                               0D   1600
     142    6533       0       0       0       0       0       001010001D   1601
     142       0       0       1       0                               0D   1602
     144    6534       0       0   10000       0       0       000000000D   1603
     144       0       0       1       0                PartBody       0D   1604
     128    6535       0       0       0       0       0       001010001D   1605
     128       0       0      55       0                               0D   1606
     126    6590       0       0       0       0       0       001010001D   1607
     126       0       0       7       0                               0D   1608
     126    6597       0       0       0       0       0       001010001D   1609
     126       0       0       7       0                               0D   1610
     126    6604       0       0       0       0       0       001010001D   1611
     126       0       0       6       0                               0D   1612
     126    6610       0       0       0       0       0       001010001D   1613
     126       0       0       7       0                               0D   1614
     126    6617       0       0       0       0       0       001010001D   1615
     126       0       0       6       0                               0D   1616
     126    6623       0       0       0       0       0       001010001D   1617
     126       0       0       5       0                               0D   1618
     126    6628       0       0       0       0       0       001010001D   1619
     126       0       0       6       0                               0D   1620
     126    6634       0       0       0       0       0       001010001D   1621
     126       0       0       6       0                               0D   1622
     126    6640       0       0       0       0       0       001010001D   1623
     126       0       0       6       0                               0D   1624
     126    6646       0       0       0       0       0       001010001D   1625
     126       0       0       5       0                               0D   1626
     126    6651       0       0       0       0       0       001010001D   1627
     126       0       0       7       0                               0D   1628
     126    6658       0       0       0       0       0       001010001D   1629
     126       0       0       9       0                               0D   1630
     126    6667       0       0       0       0       0       001010001D   1631
     126       0       0      10       0                               0D   1632
     102    6677       0       0       0       0       0       001010001D   1633
     102       0       0       2       0                               0D   1634
     110    6679       0       0       0       0       0       001010501D   1635
     110       0       0       1       0                               0D   1636
     110    6680       0       0       0       0       0       001010501D   1637
     110       0       0       2       0                               0D   1638
     126    6682       0       0       0       0       0       001010501D   1639
     126       0       0       7       0                               0D   1640
     126    6689       0       0       0       0       0       001010501D   1641
     126       0       0       9       0                               0D   1642
     126    6698       0       0       0       0       0       001010501D   1643
     126       0       0       7       0                               0D   1644
     126    6705       0       0       0       0       0       001010501D   1645
     126       0       0       7       0                               0D   1646
     126    6712       0       0       0       0       0       001010501D   1647
     126       0       0       9       0                               0D   1648
     126    6721       0       0       0       0       0       001010501D   1649
     126       0       0       7       0                               0D   1650
     126    6728       0       0       0       0       0       001010501D   1651
     126       0       0       7       0                               0D   1652
     126    6735       0       0       0       0       0       001010501D   1653
     126       0       0       6       0                               0D   1654
     110    6741       0       0       0       0       0       001010501D   1655
     110       0       0       1       0                               0D   1656
     110    6742       0       0       0       0       0       001010501D   1657
     110       0       0       1       0                               0D   1658
     110    6743       0       0       0       0       0       001010501D   1659
     110       0       0       1       0                               0D   1660
     102    6744       0       0       0       0       0       001010501D   1661
     102       0       0       2       0                               0D   1662
     142    6746       0       0       0       0       0       001010001D   1663
     142       0       0       1       0                               0D   1664
     144    6747       0       0   10000       0       0       000000000D   1665
     144       0       0       1       0                PartBody       0D   1666
     128    6748       0       0       0       0       0       001010001D   1667
     128       0       0      20       0                               0D   1668
     126    6768       0       0       0       0       0       001010001D   1669
     126       0       0       7       0                               0D   1670
     126    6775       0       0       0       0       0       001010001D   1671
     126       0       0       5       0                               0D   1672
     126    6780       0       0       0       0       0       001010001D   1673
     126       0       0       7       0                               0D   1674
     126    6787       0       0       0       0       0       001010001D   1675
     126       0       0       5       0                               0D   1676
     126    6792       0       0       0       0       0       001010001D   1677
     126       0       0       5       0                               0D   1678
     126    6797       0       0       0       0       0       001010001D   1679
     126       0       0       5       0                               0D   1680
     102    6802       0       0       0       0       0       001010001D   1681
     102       0       0       1       0                               0D   1682
     110    6803       0       0       0       0       0       001010501D   1683
     110       0       0       1       0                               0D   1684
     110    6804       0       0       0       0       0       001010501D   1685
     110       0       0       1       0                               0D   1686
     110    6805       0       0       0       0       0       001010501D   1687
     110       0       0       1       0                               0D   1688
     126    6806       0       0       0       0       0       001010501D   1689
     126       0       0       7       0                               0D   1690
     126    6813       0       0       0       0       0       001010501D   1691
     126       0       0       6       0                               0D   1692
     110    6819       0       0       0       0       0       001010501D   1693
     110       0       0       1       0                               0D   1694
     102    6820       0       0       0       0       0       001010501D   1695
     102       0       0       1       0                               0D   1696
     142    6821       0       0       0       0       0       001010001D   1697
     142       0       0       1       0                               0D   1698
     144    6822       0       0   10000       0       0       000000000D   1699
     144       0       0       1       0                PartBody       0D   1700
     128    6823       0       0       0       0       0       001010001D   1701
     128       0       0     181       0                               0D   1702
     126    7004       0       0       0       0       0       001010001D   1703
     126       0       0      15       0                               0D   1704
     126    7019       0       0       0       0       0       001010001D   1705
     126       0       0       5       0                               0D   1706
     126    7024       0       0       0       0       0       001010001D   1707
     126       0       0      19       0                               0D   1708
     126    7043       0       0       0       0       0       001010001D   1709
     126       0       0       6       0                               0D   1710
     102    7049       0       0       0       0       0       001010001D   1711
     102       0       0       1       0                               0D   1712
     126    7050       0       0       0       0       0       001010501D   1713
     126       0       0      20       0                               0D   1714
     126    7070       0       0       0       0       0       001010501D   1715
     126       0       0       6       0                               0D   1716
     126    7076       0       0       0       0       0       001010501D   1717
     126       0       0      19       0                               0D   1718
     126    7095       0       0       0       0       0       001010501D   1719
     126       0       0       7       0                               0D   1720
     102    7102       0       0       0       0       0       001010501D   1721
     102       0       0       1       0                               0D   1722
     142    7103       0       0       0       0       0       001010001D   1723
     142       0       0       1       0                               0D   1724
     144    7104       0       0   10000       0       0       000000000D   1725
     144       0       0       1       0                PartBody       0D   1726
     128    7105       0       0       0       0       0       001010001D   1727
     128       0       0     181       0                               0D   1728
     126    7286       0       0       0       0       0       001010001D   1729
     126       0       0      13       0                               0D   1730
     126    7299       0       0       0       0       0       001010001D   1731
     126       0       0       6       0                               0D   1732
     102    7305       0       0       0       0       0       001010001D   1733
     102       0       0       1       0                               0D   1734
     126    7306       0       0       0       0       0       001010501D   1735
     126       0       0      13       0                               0D   1736
     126    7319       0       0       0       0       0       001010501D   1737
     126       0       0       8       0                               0D   1738
     102    7327       0       0       0       0       0       001010501D   1739
     102       0       0       1       0                               0D   1740
     142    7328       0       0       0       0       0       001010001D   1741
     142       0       0       1       0                               0D   1742
     144    7329       0       0   10000       0       0       000000000D   1743
     144       0       0       1       0                PartBody       0D   1744
     128    7330       0       0       0       0       0       001010001D   1745
     128       0       0     181       0                               0D   1746
     126    7511       0       0       0       0       0       001010001D   1747
     126       0       0       6       0                               0D   1748
     126    7517       0       0       0       0       0       001010001D   1749
     126       0       0       5       0                               0D   1750
     102    7522       0       0       0       0       0       001010001D   1751
     102       0       0       1       0                               0D   1752
     126    7523       0       0       0       0       0       001010501D   1753
     126       0       0       9       0                               0D   1754
     126    7532       0       0       0       0       0       001010501D   1755
     126       0       0       6       0                               0D   1756
     102    7538       0       0       0       0       0       001010501D   1757
     102       0       0       1       0                               0D   1758
     142    7539       0       0       0       0       0       001010001D   1759
     142       0       0       1       0                               0D   1760
     144    7540       0       0   10000       0       0       000000000D   1761
     144       0       0       1       0                PartBody       0D   1762
     128    7541       0       0       0       0       0       001010001D   1763
     128       0       0     181       0                               0D   1764
     126    7722       0       0       0       0       0       001010001D   1765
     126       0       0       5       0                               0D   1766
     126    7727       0       0       0       0       0       001010001D   1767
     126       0       0       5       0                               0D   1768
     126    7732       0       0       0       0       0       001010001D   1769
     126       0       0       5       0                               0D   1770
     126    7737       0       0       0       0       0       001010001D   1771
     126       0       0       5       0                               0D   1772
     126    7742       0       0       0       0       0       001010001D   1773
     126       0       0       6       0                               0D   1774
     102    7748       0       0       0       0       0       001010001D   1775
     102       0       0       1       0                               0D   1776
     126    7749       0       0       0       0       0       001010501D   1777
     126       0       0       8       0                               0D   1778
     126    7757       0       0       0       0       0       001010501D   1779
     126       0       0       6       0                               0D   1780
     126    7763       0       0       0       0       0       001010501D   1781
     126       0       0       6       0                               0D   1782
     126    7769       0       0       0       0       0       001010501D   1783
     126       0       0       6       0                               0D   1784
     126    7775       0       0       0       0       0       001010501D   1785
     126       0       0       8       0                               0D   1786
     102    7783       0       0       0       0       0       001010501D   1787
     102       0       0       1       0                               0D   1788
     142    7784       0       0       0       0       0       001010001D   1789
     142       0       0       1       0                               0D   1790
     144    7785       0       0   10000       0       0       000000000D   1791
     144       0       0       1       0                PartBody       0D   1792
     108    7786       0       0       0       0       0       001010001D   1793
     108       0       0       1       0                               0D   1794
     124    7787       0       0       0       0       0       001020001D   1795
     124       0       0       1       0                               0D   1796
     100    7788       0       0       0       0    1795       001010001D   1797
     100       0       0       1       0                               0D   1798
     124    7789       0       0       0       0       0       001020001D   1799
     124       0       0       1       0                               0D   1800
     100    7790       0       0       0       0    1799       001010001D   1801
     100       0       0       1       0                               0D   1802
     102    7791       0       0       0       0       0       001010001D   1803
     102       0       0       1       0                               0D   1804
     142    7792       0       0       0       0       0       001010001D   1805
     142       0       0       1       0                               0D   1806
     124    7793       0       0       0       0       0       001020001D   1807
     124       0       0       1       0                               0D   1808
     100    7794       0       0       0       0    1807       001010001D   1809
     100       0       0       1       0                               0D   1810
     124    7795       0       0       0       0       0       001020001D   1811
     124       0       0       1       0                               0D   1812
     100    7796       0       0       0       0    1811       001010001D   1813
     100       0       0       1       0                               0D   1814
     102    7797       0       0       0       0       0       001010001D   1815
     102       0       0       1       0                               0D   1816
     142    7798       0       0       0       0       0       001010001D   1817
     142       0       0       1       0                               0D   1818
     110    7799       0       0       0       0       0       001010001D   1819
     110       0       0       1       0                               0D   1820
     110    7800       0       0       0       0       0       001010001D   1821
     110       0       0       1       0                               0D   1822
     110    7801       0       0       0       0       0       001010001D   1823
     110       0       0       2       0                               0D   1824
     110    7803       0       0       0       0       0       001010001D   1825
     110       0       0       2       0                               0D   1826
     110    7805       0       0       0       0       0       001010001D   1827
     110       0       0       2       0                               0D   1828
     110    7807       0       0       0       0       0       001010001D   1829
     110       0       0       2       0                               0D   1830
     110    7809       0       0       0       0       0       001010001D   1831
     110       0       0       2       0                               0D   1832
     110    7811       0       0       0       0       0       001010001D   1833
     110       0       0       2       0                               0D   1834
     110    7813       0       0       0       0       0       001010001D   1835
     110       0       0       2       0                               0D   1836
     110    7815       0       0       0       0       0       001010001D   1837
     110       0       0       2       0                               0D   1838
     110    7817       0       0       0       0       0       001010001D   1839
     110       0       0       1       0                               0D   1840
     110    7818       0       0       0       0       0       001010001D   1841
     110       0       0       1       0                               0D   1842
     110    7819       0       0       0       0       0       001010001D   1843
     110       0       0       1       0                               0D   1844
     102    7820       0       0       0       0       0       001010001D   1845
     102       0       0       2       0                               0D   1846
     142    7822       0       0       0       0       0       001010001D   1847
     142       0       0       1       0                               0D   1848
     110    7823       0       0       0       0       0       001010001D   1849
     110       0       0       2       0                               0D   1850
     110    7825       0       0       0       0       0       001010001D   1851
     110       0       0       2       0                               0D   1852
     110    7827       0       0       0       0       0       001010001D   1853
     110       0       0       2       0                               0D   1854
     110    7829       0       0       0       0       0       001010001D   1855
     110       0       0       2       0                               0D   1856
     110    7831       0       0       0       0       0       001010001D   1857
     110       0       0       2       0                               0D   1858
     110    7833       0       0       0       0       0       001010001D   1859
     110       0       0       2       0                               0D   1860
     110    7835       0       0       0       0       0       001010001D   1861
     110       0       0       2       0                               0D   1862
     110    7837       0       0       0       0       0       001010001D   1863
     110       0       0       2       0                               0D   1864
     110    7839       0       0       0       0       0       001010001D   1865
     110       0       0       2       0                               0D   1866
     110    7841       0       0       0       0       0       001010001D   1867
     110       0       0       2       0                               0D   1868
     110    7843       0       0       0       0       0       001010001D   1869
     110       0       0       2       0                               0D   1870
     110    7845       0       0       0       0       0       001010001D   1871
     110       0       0       2       0                               0D   1872
     102    7847       0       0       0       0       0       001010001D   1873
     102       0       0       2       0                               0D   1874
     142    7849       0       0       0       0       0       001010001D   1875
     142       0       0       1       0                               0D   1876
     110    7850       0       0       0       0       0       001010001D   1877
     110       0       0       2       0                               0D   1878
     110    7852       0       0       0       0       0       001010001D   1879
     110       0       0       2       0                               0D   1880
     110    7854       0       0       0       0       0       001010001D   1881
     110       0       0       2       0                               0D   1882
     110    7856       0       0       0       0       0       001010001D   1883
     110       0       0       2       0                               0D   1884
     110    7858       0       0       0       0       0       001010001D   1885
     110       0       0       2       0                               0D   1886
     110    7860       0       0       0       0       0       001010001D   1887
     110       0       0       2       0                               0D   1888
     110    7862       0       0       0       0       0       001010001D   1889
     110       0       0       2       0                               0D   1890
     110    7864       0       0       0       0       0       001010001D   1891
     110       0       0       2       0                               0D   1892
     110    7866       0       0       0       0       0       001010001D   1893
     110       0       0       2       0                               0D   1894
     110    7868       0       0       0       0       0       001010001D   1895
     110       0       0       2       0                               0D   1896
     110    7870       0       0       0       0       0       001010001D   1897
     110       0       0       2       0                               0D   1898
     110    7872       0       0       0       0       0       001010001D   1899
     110       0       0       2       0                               0D   1900
     110    7874       0       0       0       0       0       001010001D   1901
     110       0       0       2       0                               0D   1902
     110    7876       0       0       0       0       0       001010001D   1903
     110       0       0       2       0                               0D   1904
     110    7878       0       0       0       0       0       001010001D   1905
     110       0       0       2       0                               0D   1906
     110    7880       0       0       0       0       0       001010001D   1907
     110       0       0       2       0                               0D   1908
     110    7882       0       0       0       0       0       001010001D   1909
     110       0       0       2       0                               0D   1910
     110    7884       0       0       0       0       0       001010001D   1911
     110       0       0       2       0                               0D   1912
     110    7886       0       0       0       0       0       001010001D   1913
     110       0       0       2       0                               0D   1914
     110    7888       0       0       0       0       0       001010001D   1915
     110       0       0       2       0                               0D   1916
     110    7890       0       0       0       0       0       001010001D   1917
     110       0       0       2       0                               0D   1918
     110    7892       0       0       0       0       0       001010001D   1919
     110       0       0       2       0                               0D   1920
     110    7894       0       0       0       0       0       001010001D   1921
     110       0       0       2       0                               0D   1922
     110    7896       0       0       0       0       0       001010001D   1923
     110       0       0       2       0                               0D   1924
     110    7898       0       0       0       0       0       001010001D   1925
     110       0       0       1       0                               0D   1926
     110    7899       0       0       0       0       0       001010001D   1927
     110       0       0       1       0                               0D   1928
     110    7900       0       0       0       0       0       001010001D   1929
     110       0       0       2       0                               0D   1930
     110    7902       0       0       0       0       0       001010001D   1931
     110       0       0       2       0                               0D   1932
     102    7904       0       0       0       0       0       001010001D   1933
     102       0       0       3       0                               0D   1934
     142    7907       0       0       0       0       0       001010001D   1935
     142       0       0       1       0                               0D   1936
     110    7908       0       0       0       0       0       001010001D   1937
     110       0       0       2       0                               0D   1938
     110    7910       0       0       0       0       0       001010001D   1939
     110       0       0       2       0                               0D   1940
     110    7912       0       0       0       0       0       001010001D   1941
     110       0       0       2       0                               0D   1942
     110    7914       0       0       0       0       0       001010001D   1943
     110       0       0       2       0                               0D   1944
     110    7916       0       0       0       0       0       001010001D   1945
     110       0       0       2       0                               0D   1946
     110    7918       0       0       0       0       0       001010001D   1947
     110       0       0       2       0                               0D   1948
     110    7920       0       0       0       0       0       001010001D   1949
     110       0       0       2       0                               0D   1950
     110    7922       0       0       0       0       0       001010001D   1951
     110       0       0       2       0                               0D   1952
     110    7924       0       0       0       0       0       001010001D   1953
     110       0       0       2       0                               0D   1954
     110    7926       0       0       0       0       0       001010001D   1955
     110       0       0       2       0                               0D   1956
     110    7928       0       0       0       0       0       001010001D   1957
     110       0       0       2       0                               0D   1958
     110    7930       0       0       0       0       0       001010001D   1959
     110       0       0       2       0                               0D   1960
     102    7932       0       0       0       0       0       001010001D   1961
     102       0       0       2       0                               0D   1962
     142    7934       0       0       0       0       0       001010001D   1963
     142       0       0       1       0                               0D   1964
     110    7935       0       0       0       0       0       001010001D   1965
     110       0       0       2       0                               0D   1966
     110    7937       0       0       0       0       0       001010001D   1967
     110       0       0       2       0                               0D   1968
     110    7939       0       0       0       0       0       001010001D   1969
     110       0       0       2       0                               0D   1970
     110    7941       0       0       0       0       0       001010001D   1971
     110       0       0       2       0                               0D   1972
     110    7943       0       0       0       0       0       001010001D   1973
     110       0       0       2       0                               0D   1974
     110    7945       0       0       0       0       0       001010001D   1975
     110       0       0       2       0                               0D   1976
     110    7947       0       0       0       0       0       001010001D   1977
     110       0       0       2       0                               0D   1978
     110    7949       0       0       0       0       0       001010001D   1979
     110       0       0       2       0                               0D   1980
     110    7951       0       0       0       0       0       001010001D   1981
     110       0       0       2       0                               0D   1982
     110    7953       0       0       0       0       0       001010001D   1983
     110       0       0       2       0                               0D   1984
     110    7955       0       0       0       0       0       001010001D   1985
     110       0       0       2       0                               0D   1986
     110    7957       0       0       0       0       0       001010001D   1987
     110       0       0       2       0                               0D   1988
     110    7959       0       0       0       0       0       001010001D   1989
     110       0       0       2       0                               0D   1990
     110    7961       0       0       0       0       0       001010001D   1991
     110       0       0       2       0                               0D   1992
     110    7963       0       0       0       0       0       001010001D   1993
     110       0       0       2       0                               0D   1994
     110    7965       0       0       0       0       0       001010001D   1995
     110       0       0       2       0                               0D   1996
     110    7967       0       0       0       0       0       001010001D   1997
     110       0       0       2       0                               0D   1998
     102    7969       0       0       0       0       0       001010001D   1999
     102       0       0       2       0                               0D   2000
     142    7971       0       0       0       0       0       001010001D   2001
     142       0       0       1       0                               0D   2002
     110    7972       0       0       0       0       0       001010001D   2003
     110       0       0       2       0                               0D   2004
     110    7974       0       0       0       0       0       001010001D   2005
     110       0       0       2       0                               0D   2006
     110    7976       0       0       0       0       0       001010001D   2007
     110       0       0       2       0                               0D   2008
     110    7978       0       0       0       0       0       001010001D   2009
     110       0       0       2       0                               0D   2010
     110    7980       0       0       0       0       0       001010001D   2011
     110       0       0       2       0                               0D   2012
     110    7982       0       0       0       0       0       001010001D   2013
     110       0       0       2       0                               0D   2014
     110    7984       0       0       0       0       0       001010001D   2015
     110       0       0       2       0                               0D   2016
     110    7986       0       0       0       0       0       001010001D   2017
     110       0       0       2       0                               0D   2018
     110    7988       0       0       0       0       0       001010001D   2019
     110       0       0       2       0                               0D   2020
     110    7990       0       0       0       0       0       001010001D   2021
     110       0       0       2       0                               0D   2022
     102    7992       0       0       0       0       0       001010001D   2023
     102       0       0       1       0                               0D   2024
     142    7993       0       0       0       0       0       001010001D   2025
     142       0       0       1       0                               0D   2026
     144    7994       0       0   10000       0       0       000000000D   2027
     144       0       0       1       0                PartBody       0D   2028
     110    7995       0       0       0       0       0       001010001D   2029
     110       0       0       1       0                               0D   2030
     110    7996       0       0       0       0       0       001010001D   2031
     110       0       0       1       0                               0D   2032
     110    7997       0       0       0       0       0       001010001D   2033
     110       0       0       2       0                               0D   2034
     110    7999       0       0       0       0       0       001010001D   2035
     110       0       0       1       0                               0D   2036
     110    8000       0       0       0       0       0       001010001D   2037
     110       0       0       1       0                               0D   2038
     110    8001       0       0       0       0       0       001010001D   2039
     110       0       0       2       0                               0D   2040
     110    8003       0       0       0       0       0       001010001D   2041
     110       0       0       2       0                               0D   2042
     110    8005       0       0       0       0       0       001010001D   2043
     110       0       0       2       0                               0D   2044
     110    8007       0       0       0       0       0       001010001D   2045
     110       0       0       2       0                               0D   2046
     110    8009       0       0       0       0       0       001010001D   2047
     110       0       0       2       0                               0D   2048
     110    8011       0       0       0       0       0       001010001D   2049
     110       0       0       2       0                               0D   2050
     102    8013       0       0       0       0       0       001010001D   2051
     102       0       0       2       0                               0D   2052
     142    8015       0       0       0       0       0       001010001D   2053
     142       0       0       1       0                               0D   2054
     144    8016       0       0   10000       0       0       000000000D   2055
     144       0       0       1       0                PartBody       0D   2056
     110    8017       0       0       0       0       0       001010001D   2057
     110       0       0       2       0                               0D   2058
     110    8019       0       0       0       0       0       001010001D   2059
     110       0       0       2       0                               0D   2060
     110    8021       0       0       0       0       0       001010001D   2061
     110       0       0       2       0                               0D   2062
     110    8023       0       0       0       0       0       001010001D   2063
     110       0       0       2       0                               0D   2064
     110    8025       0       0       0       0       0       001010001D   2065
     110       0       0       2       0                               0D   2066
     110    8027       0       0       0       0       0       001010001D   2067
     110       0       0       2       0                               0D   2068
     110    8029       0       0       0       0       0       001010001D   2069
     110       0       0       2       0                               0D   2070
     110    8031       0       0       0       0       0       001010001D   2071
     110       0       0       2       0                               0D   2072
     110    8033       0       0       0       0       0       001010001D   2073
     110       0       0       2       0                               0D   2074
     110    8035       0       0       0       0       0       001010001D   2075
     110       0       0       2       0                               0D   2076
     110    8037       0       0       0       0       0       001010001D   2077
     110       0       0       2       0                               0D   2078
     110    8039       0       0       0       0       0       001010001D   2079
     110       0       0       2       0                               0D   2080
     110    8041       0       0       0       0       0       001010001D   2081
     110       0       0       2       0                               0D   2082
     110    8043       0       0       0       0       0       001010001D   2083
     110       0       0       2       0                               0D   2084
     110    8045       0       0       0       0       0       001010001D   2085
     110       0       0       2       0                               0D   2086
     110    8047       0       0       0       0       0       001010001D   2087
     110       0       0       2       0                               0D   2088
     102    8049       0       0       0       0       0       001010001D   2089
     102       0       0       2       0                               0D   2090
     142    8051       0       0       0       0       0       001010001D   2091
     142       0       0       1       0                               0D   2092
     144    8052       0       0   10000       0       0       000000000D   2093
     144       0       0       1       0                PartBody       0D   2094
     108    8053       0       0       0       0       0       001010001D   2095
     108       0       0       2       0                               0D   2096
     110    8055       0       0       0       0       0       001010001D   2097
     110       0       0       2       0                               0D   2098
     110    8057       0       0       0       0       0       001010001D   2099
     110       0       0       2       0                               0D   2100
     110    8059       0       0       0       0       0       001010001D   2101
     110       0       0       1       0                               0D   2102
     110    8060       0       0       0       0       0       001010001D   2103
     110       0       0       2       0                               0D   2104
     102    8062       0       0       0       0       0       001010001D   2105
     102       0       0       1       0                               0D   2106
     142    8063       0       0       0       0       0       001010001D   2107
     142       0       0       1       0                               0D   2108
     144    8064       0       0   10000       0       0       000000000D   2109
     144       0       0       1       0                PartBody       0D   2110
     108    8065       0       0       0       0       0       001010001D   2111
     108       0       0       2       0                               0D   2112
     110    8067       0       0       0       0       0       001010001D   2113
     110       0       0       2       0                               0D   2114
     110    8069       0       0       0       0       0       001010001D   2115
     110       0       0       2       0                               0D   2116
     110    8071       0       0       0       0       0       001010001D   2117
     110       0       0       1       0                               0D   2118
     110    8072       0       0       0       0       0       001010001D   2119
     110       0       0       2       0                               0D   2120
     102    8074       0       0       0       0       0       001010001D   2121
     102       0       0       1       0                               0D   2122
     142    8075       0       0       0       0       0       001010001D   2123
     142       0       0       1       0                               0D   2124
     144    8076       0       0   10000       0       0       000000000D   2125
     144       0       0       1       0                PartBody       0D   2126
     108    8077       0       0       0       0       0       001010001D   2127
     108       0       0       2       0                               0D   2128
     110    8079       0       0       0       0       0       001010001D   2129
     110       0       0       2       0                               0D   2130
     110    8081       0       0       0       0       0       001010001D   2131
     110       0       0       2       0                               0D   2132
     110    8083       0       0       0       0       0       001010001D   2133
     110       0       0       2       0                               0D   2134
     110    8085       0       0       0       0       0       001010001D   2135
     110       0       0       2       0                               0D   2136
     102    8087       0       0       0       0       0       001010001D   2137
     102       0       0       1       0                               0D   2138
     142    8088       0       0       0       0       0       001010001D   2139
     142       0       0       1       0                               0D   2140
     144    8089       0       0   10000       0       0       000000000D   2141
     144       0       0       1       0                PartBody       0D   2142
     108    8090       0       0       0       0       0       001010001D   2143
     108       0       0       1       0                               0D   2144
     110    8091       0       0       0       0       0       001010001D   2145
     110       0       0       2       0                               0D   2146
     110    8093       0       0       0       0       0       001010001D   2147
     110       0       0       2       0                               0D   2148
     110    8095       0       0       0       0       0       001010001D   2149
     110       0       0       2       0                               0D   2150
     110    8097       0       0       0       0       0       001010001D   2151
     110       0       0       2       0                               0D   2152
     110    8099       0       0       0       0       0       001010001D   2153
     110       0       0       2       0                               0D   2154
     110    8101       0       0       0       0       0       001010001D   2155
     110       0       0       2       0                               0D   2156
     110    8103       0       0       0       0       0       001010001D   2157
     110       0       0       2       0                               0D   2158
     110    8105       0       0       0       0       0       001010001D   2159
     110       0       0       2       0                               0D   2160
     110    8107       0       0       0       0       0       001010001D   2161
     110       0       0       2       0                               0D   2162
     110    8109       0       0       0       0       0       001010001D   2163
     110       0       0       2       0                               0D   2164
     110    8111       0       0       0       0       0       001010001D   2165
     110       0       0       2       0                               0D   2166
     110    8113       0       0       0       0       0       001010001D   2167
     110       0       0       2       0                               0D   2168
     110    8115       0       0       0       0       0       001010001D   2169
     110       0       0       2       0                               0D   2170
     102    8117       0       0       0       0       0       001010001D   2171
     102       0       0       2       0                               0D   2172
     142    8119       0       0       0       0       0       001010001D   2173
     142       0       0       1       0                               0D   2174
     144    8120       0       0   10000       0       0       000000000D   2175
     144       0       0       1       0                PartBody       0D   2176
     108    8121       0       0       0       0       0       001010001D   2177
     108       0       0       2       0                               0D   2178
     110    8123       0       0       0       0       0       001010001D   2179
     110       0       0       2       0                               0D   2180
     110    8125       0       0       0       0       0       001010001D   2181
     110       0       0       2       0                               0D   2182
     110    8127       0       0       0       0       0       001010001D   2183
     110       0       0       1       0                               0D   2184
     110    8128       0       0       0       0       0       001010001D   2185
     110       0       0       2       0                               0D   2186
     102    8130       0       0       0       0       0       001010001D   2187
     102       0       0       1       0                               0D   2188
     142    8131       0       0       0       0       0       001010001D   2189
     142       0       0       1       0                               0D   2190
     144    8132       0       0   10000       0       0       000000000D   2191
     144       0       0       1       0                PartBody       0D   2192
     108    8133       0       0       0       0       0       001010001D   2193
     108       0       0       2       0                               0D   2194
     110    8135       0       0       0       0       0       001010001D   2195
     110       0       0       2       0                               0D   2196
     110    8137       0       0       0       0       0       001010001D   2197
     110       0       0       2       0                               0D   2198
     110    8139       0       0       0       0       0       001010001D   2199
     110       0       0       2       0                               0D   2200
     110    8141       0       0       0       0       0       001010001D   2201
     110       0       0       2       0                               0D   2202
     102    8143       0       0       0       0       0       001010001D   2203
     102       0       0       1       0                               0D   2204
     142    8144       0       0       0       0       0       001010001D   2205
     142       0       0       1       0                               0D   2206
     144    8145       0       0   10000       0       0       000000000D   2207
     144       0       0       1       0                PartBody       0D   2208
     110    8146       0       0       0       0       0       001010001D   2209
     110       0       0       2       0                               0D   2210
     110    8148       0       0       0       0       0       001010001D   2211
     110       0       0       2       0                               0D   2212
     110    8150       0       0       0       0       0       001010001D   2213
     110       0       0       2       0                               0D   2214
     110    8152       0       0       0       0       0       001010001D   2215
     110       0       0       2       0                               0D   2216
     102    8154       0       0       0       0       0       001010001D   2217
     102       0       0       1       0                               0D   2218
     142    8155       0       0       0       0       0       001010001D   2219
     142       0       0       1       0                               0D   2220
     144    8156       0       0   10000       0       0       000000000D   2221
     144       0       0       1       0                PartBody       0D   2222
     108    8157       0       0       0       0       0       001010001D   2223
     108       0       0       2       0                               0D   2224
     110    8159       0       0       0       0       0       001010001D   2225
     110       0       0       2       0                               0D   2226
     110    8161       0       0       0       0       0       001010001D   2227
     110       0       0       2       0                               0D   2228
     110    8163       0       0       0       0       0       001010001D   2229
     110       0       0       2       0                               0D   2230
     110    8165       0       0       0       0       0       001010001D   2231
     110       0       0       2       0                               0D   2232
     102    8167       0       0       0       0       0       001010001D   2233
     102       0       0       1       0                               0D   2234
     142    8168       0       0       0       0       0       001010001D   2235
     142       0       0       1       0                               0D   2236
     144    8169       0       0   10000       0       0       000000000D   2237
     144       0       0       1       0                PartBody       0D   2238
     110    8170       0       0       0       0       0       001010001D   2239
     110       0       0       2       0                               0D   2240
     110    8172       0       0       0       0       0       001010001D   2241
     110       0       0       2       0                               0D   2242
     110    8174       0       0       0       0       0       001010001D   2243
     110       0       0       2       0                               0D   2244
     110    8176       0       0       0       0       0       001010001D   2245
     110       0       0       2       0                               0D   2246
     102    8178       0       0       0       0       0       001010001D   2247
     102       0       0       1       0                               0D   2248
     142    8179       0       0       0       0       0       001010001D   2249
     142       0       0       1       0                               0D   2250
     144    8180       0       0   10000       0       0       000000000D   2251
     144       0       0       1       0                PartBody       0D   2252
     108    8181       0       0       0       0       0       001010001D   2253
     108       0       0       2       0                               0D   2254
     110    8183       0       0       0       0       0       001010001D   2255
     110       0       0       2       0                               0D   2256
     110    8185       0       0       0       0       0       001010001D   2257
     110       0       0       2       0                               0D   2258
     110    8187       0       0       0       0       0       001010001D   2259
     110       0       0       2       0                               0D   2260
     110    8189       0       0       0       0       0       001010001D   2261
     110       0       0       2       0                               0D   2262
     102    8191       0       0       0       0       0       001010001D   2263
     102       0       0       1       0                               0D   2264
     142    8192       0       0       0       0       0       001010001D   2265
     142       0       0       1       0                               0D   2266
     144    8193       0       0   10000       0       0       000000000D   2267
     144       0       0       1       0                PartBody       0D   2268
     108    8194       0       0       0       0       0       001010001D   2269
     108       0       0       2       0                               0D   2270
     110    8196       0       0       0       0       0       001010001D   2271
     110       0       0       2       0                               0D   2272
     110    8198       0       0       0       0       0       001010001D   2273
     110       0       0       2       0                               0D   2274
     110    8200       0       0       0       0       0       001010001D   2275
     110       0       0       2       0                               0D   2276
     110    8202       0       0       0       0       0       001010001D   2277
     110       0       0       2       0                               0D   2278
     102    8204       0       0       0       0       0       001010001D   2279
     102       0       0       1       0                               0D   2280
     142    8205       0       0       0       0       0       001010001D   2281
     142       0       0       1       0                               0D   2282
     144    8206       0       0   10000       0       0       000000000D   2283
     144       0       0       1       0                PartBody       0D   2284
     110    8207       0       0       0       0       0       001010001D   2285
     110       0       0       2       0                               0D   2286
     110    8209       0       0       0       0       0       001010001D   2287
     110       0       0       2       0                               0D   2288
     110    8211       0       0       0       0       0       001010001D   2289
     110       0       0       2       0                               0D   2290
     110    8213       0       0       0       0       0       001010001D   2291
     110       0       0       2       0                               0D   2292
     102    8215       0       0       0       0       0       001010001D   2293
     102       0       0       1       0                               0D   2294
     142    8216       0       0       0       0       0       001010001D   2295
     142       0       0       1       0                               0D   2296
     144    8217       0       0   10000       0       0       000000000D   2297
     144       0       0       1       0                PartBody       0D   2298
     108    8218       0       0       0       0       0       001010001D   2299
     108       0       0       2       0                               0D   2300
     110    8220       0       0       0       0       0       001010001D   2301
     110       0       0       2       0                               0D   2302
     110    8222       0       0       0       0       0       001010001D   2303
     110       0       0       2       0                               0D   2304
     110    8224       0       0       0       0       0       001010001D   2305
     110       0       0       1       0                               0D   2306
     110    8225       0       0       0       0       0       001010001D   2307
     110       0       0       2       0                               0D   2308
     102    8227       0       0       0       0       0       001010001D   2309
     102       0       0       1       0                               0D   2310
     142    8228       0       0       0       0       0       001010001D   2311
     142       0       0       1       0                               0D   2312
     144    8229       0       0   10000       0       0       000000000D   2313
     144       0       0       1       0                PartBody       0D   2314
     108    8230       0       0       0       0       0       001010001D   2315
     108       0       0       2       0                               0D   2316
     110    8232       0       0       0       0       0       001010001D   2317
     110       0       0       2       0                               0D   2318
     110    8234       0       0       0       0       0       001010001D   2319
     110       0       0       2       0                               0D   2320
     110    8236       0       0       0       0       0       001010001D   2321
     110       0       0       1       0                               0D   2322
     110    8237       0       0       0       0       0       001010001D   2323
     110       0       0       2       0                               0D   2324
     102    8239       0       0       0       0       0       001010001D   2325
     102       0       0       1       0                               0D   2326
     142    8240       0       0       0       0       0       001010001D   2327
     142       0       0       1       0                               0D   2328
     144    8241       0       0   10000       0       0       000000000D   2329
     144       0       0       1       0                PartBody       0D   2330
     108    8242       0       0       0       0       0       001010001D   2331
     108       0       0       2       0                               0D   2332
     110    8244       0       0       0       0       0       001010001D   2333
     110       0       0       2       0                               0D   2334
     110    8246       0       0       0       0       0       001010001D   2335
     110       0       0       2       0                               0D   2336
     110    8248       0       0       0       0       0       001010001D   2337
     110       0       0       2       0                               0D   2338
     110    8250       0       0       0       0       0       001010001D   2339
     110       0       0       2       0                               0D   2340
     102    8252       0       0       0       0       0       001010001D   2341
     102       0       0       1       0                               0D   2342
     142    8253       0       0       0       0       0       001010001D   2343
     142       0       0       1       0                               0D   2344
     144    8254       0       0   10000       0       0       000000000D   2345
     144       0       0       1       0                PartBody       0D   2346
     108    8255       0       0       0       0       0       001010001D   2347
     108       0       0       2       0                               0D   2348
     110    8257       0       0       0       0       0       001010001D   2349
     110       0       0       2       0                               0D   2350
     110    8259       0       0       0       0       0       001010001D   2351
     110       0       0       2       0                               0D   2352
     110    8261       0       0       0       0       0       001010001D   2353
     110       0       0       2       0                               0D   2354
     110    8263       0       0       0       0       0       001010001D   2355
     110       0       0       2       0                               0D   2356
     102    8265       0       0       0       0       0       001010001D   2357
     102       0       0       1       0                               0D   2358
     142    8266       0       0       0       0       0       001010001D   2359
     142       0       0       1       0                               0D   2360
     144    8267       0       0   10000       0       0       000000000D   2361
     144       0       0       1       0                PartBody       0D   2362
     108    8268       0       0       0       0       0       001010001D   2363
     108       0       0       2       0                               0D   2364
     110    8270       0       0       0       0       0       001010001D   2365
     110       0       0       2       0                               0D   2366
     110    8272       0       0       0       0       0       001010001D   2367
     110       0       0       2       0                               0D   2368
     110    8274       0       0       0       0       0       001010001D   2369
     110       0       0       2       0                               0D   2370
     110    8276       0       0       0       0       0       001010001D   2371
     110       0       0       2       0                               0D   2372
     102    8278       0       0       0       0       0       001010001D   2373
     102       0       0       1       0                               0D   2374
     142    8279       0       0       0       0       0       001010001D   2375
     142       0       0       1       0                               0D   2376
     144    8280       0       0   10000       0       0       000000000D   2377
     144       0       0       1       0                PartBody       0D   2378
     110    8281       0       0       0       0       0       001010001D   2379
     110       0       0       2       0                               0D   2380
     110    8283       0       0       0       0       0       001010001D   2381
     110       0       0       2       0                               0D   2382
     110    8285       0       0       0       0       0       001010001D   2383
     110       0       0       2       0                               0D   2384
     110    8287       0       0       0       0       0       001010001D   2385
     110       0       0       2       0                               0D   2386
     110    8289       0       0       0       0       0       001010001D   2387
     110       0       0       2       0                               0D   2388
     110    8291       0       0       0       0       0       001010001D   2389
     110       0       0       2       0                               0D   2390
     110    8293       0       0       0       0       0       001010001D   2391
     110       0       0       2       0                               0D   2392
     110    8295       0       0       0       0       0       001010001D   2393
     110       0       0       2       0                               0D   2394
     110    8297       0       0       0       0       0       001010001D   2395
     110       0       0       2       0                               0D   2396
     110    8299       0       0       0       0       0       001010001D   2397
     110       0       0       2       0                               0D   2398
     110    8301       0       0       0       0       0       001010001D   2399
     110       0       0       2       0                               0D   2400
     110    8303       0       0       0       0       0       001010001D   2401
     110       0       0       2       0                               0D   2402
     102    8305       0       0       0       0       0       001010001D   2403
     102       0       0       2       0                               0D   2404
     142    8307       0       0       0       0       0       001010001D   2405
     142       0       0       1       0                               0D   2406
     144    8308       0       0   10000       0       0       000000000D   2407
     144       0       0       1       0                PartBody       0D   2408
     108    8309       0       0       0       0       0       001010001D   2409
     108       0       0       2       0                               0D   2410
     110    8311       0       0       0       0       0       001010001D   2411
     110       0       0       2       0                               0D   2412
     110    8313       0       0       0       0       0       001010001D   2413
     110       0       0       2       0                               0D   2414
     110    8315       0       0       0       0       0       001010001D   2415
     110       0       0       2       0                               0D   2416
     110    8317       0       0       0       0       0       001010001D   2417
     110       0       0       2       0                               0D   2418
     102    8319       0       0       0       0       0       001010001D   2419
     102       0       0       1       0                               0D   2420
     142    8320       0       0       0       0       0       001010001D   2421
     142       0       0       1       0                               0D   2422
     144    8321       0       0   10000       0       0       000000000D   2423
     144       0       0       1       0                PartBody       0D   2424
     108    8322       0       0       0       0       0       001010001D   2425
     108       0       0       2       0                               0D   2426
     110    8324       0       0       0       0       0       001010001D   2427
     110       0       0       2       0                               0D   2428
     110    8326       0       0       0       0       0       001010001D   2429
     110       0       0       2       0                               0D   2430
     110    8328       0       0       0       0       0       001010001D   2431
     110       0       0       2       0                               0D   2432
     110    8330       0       0       0       0       0       001010001D   2433
     110       0       0       2       0                               0D   2434
     102    8332       0       0       0       0       0       001010001D   2435
     102       0       0       1       0                               0D   2436
     142    8333       0       0       0       0       0       001010001D   2437
     142       0       0       1       0                               0D   2438
     144    8334       0       0   10000       0       0       000000000D   2439
     144       0       0       1       0                PartBody       0D   2440
     108    8335       0       0       0       0       0       001010001D   2441
     108       0       0       2       0                               0D   2442
     110    8337       0       0       0       0       0       001010001D   2443
     110       0       0       2       0                               0D   2444
     110    8339       0       0       0       0       0       001010001D   2445
     110       0       0       2       0                               0D   2446
     110    8341       0       0       0       0       0       001010001D   2447
     110       0       0       2       0                               0D   2448
     110    8343       0       0       0       0       0       001010001D   2449
     110       0       0       2       0                               0D   2450
     102    8345       0       0       0       0       0       001010001D   2451
     102       0       0       1       0                               0D   2452
     142    8346       0       0       0       0       0       001010001D   2453
     142       0       0       1       0                               0D   2454
     144    8347       0       0   10000       0       0       000000000D   2455
     144       0       0       1       0                PartBody       0D   2456
     110    8348       0       0       0       0       0       001010001D   2457
     110       0       0       2       0                               0D   2458
     110    8350       0       0       0       0       0       001010001D   2459
     110       0       0       2       0                               0D   2460
     110    8352       0       0       0       0       0       001010001D   2461
     110       0       0       2       0                               0D   2462
     110    8354       0       0       0       0       0       001010001D   2463
     110       0       0       2       0                               0D   2464
     102    8356       0       0       0       0       0       001010001D   2465
     102       0       0       1       0                               0D   2466
     142    8357       0       0       0       0       0       001010001D   2467
     142       0       0       1       0                               0D   2468
     144    8358       0       0   10000       0       0       000000000D   2469
     144       0       0       1       0                PartBody       0D   2470
     108    8359       0       0       0       0       0       001010001D   2471
     108       0       0       2       0                               0D   2472
     110    8361       0       0       0       0       0       001010001D   2473
     110       0       0       2       0                               0D   2474
     110    8363       0       0       0       0       0       001010001D   2475
     110       0       0       2       0                               0D   2476
     110    8365       0       0       0       0       0       001010001D   2477
     110       0       0       2       0                               0D   2478
     110    8367       0       0       0       0       0       001010001D   2479
     110       0       0       2       0                               0D   2480
     102    8369       0       0       0       0       0       001010001D   2481
     102       0       0       1       0                               0D   2482
     142    8370       0       0       0       0       0       001010001D   2483
     142       0       0       1       0                               0D   2484
     144    8371       0       0   10000       0       0       000000000D   2485
     144       0       0       1       0                PartBody       0D   2486
     110    8372       0       0       0       0       0       001010001D   2487
     110       0       0       2       0                               0D   2488
     110    8374       0       0       0       0       0       001010001D   2489
     110       0       0       2       0                               0D   2490
     110    8376       0       0       0       0       0       001010001D   2491
     110       0       0       2       0                               0D   2492
     110    8378       0       0       0       0       0       001010001D   2493
     110       0       0       2       0                               0D   2494
     102    8380       0       0       0       0       0       001010001D   2495
     102       0       0       1       0                               0D   2496
     142    8381       0       0       0       0       0       001010001D   2497
     142       0       0       1       0                               0D   2498
     144    8382       0       0   10000       0       0       000000000D   2499
     144       0       0       1       0                PartBody       0D   2500
     110    8383       0       0       0       0       0       001010001D   2501
     110       0       0       2       0                               0D   2502
     110    8385       0       0       0       0       0       001010001D   2503
     110       0       0       2       0                               0D   2504
     110    8387       0       0       0       0       0       001010001D   2505
     110       0       0       2       0                               0D   2506
     110    8389       0       0       0       0       0       001010001D   2507
     110       0       0       2       0                               0D   2508
     102    8391       0       0       0       0       0       001010001D   2509
     102       0       0       1       0                               0D   2510
     142    8392       0       0       0       0       0       001010001D   2511
     142       0       0       1       0                               0D   2512
     144    8393       0       0   10000       0       0       000000000D   2513
     144       0       0       1       0                PartBody       0D   2514
     108    8394       0       0       0       0       0       001010001D   2515
     108       0       0       2       0                               0D   2516
     110    8396       0       0       0       0       0       001010001D   2517
     110       0       0       2       0                               0D   2518
     110    8398       0       0       0       0       0       001010001D   2519
     110       0       0       2       0                               0D   2520
     110    8400       0       0       0       0       0       001010001D   2521
     110       0       0       2       0                               0D   2522
     110    8402       0       0       0       0       0       001010001D   2523
     110       0       0       2       0                               0D   2524
     102    8404       0       0       0       0       0       001010001D   2525
     102       0       0       1       0                               0D   2526
     142    8405       0       0       0       0       0       001010001D   2527
     142       0       0       1       0                               0D   2528
     144    8406       0       0   10000       0       0       000000000D   2529
     144       0       0       1       0                PartBody       0D   2530
     110    8407       0       0       0       0       0       001010001D   2531
     110       0       0       2       0                               0D   2532
     110    8409       0       0       0       0       0       001010001D   2533
     110       0       0       2       0                               0D   2534
     110    8411       0       0       0       0       0       001010001D   2535
     110       0       0       2       0                               0D   2536
     110    8413       0       0       0       0       0       001010001D   2537
     110       0       0       2       0                               0D   2538
     102    8415       0       0       0       0       0       001010001D   2539
     102       0       0       1       0                               0D   2540
     142    8416       0       0       0       0       0       001010001D   2541
     142       0       0       1       0                               0D   2542
     144    8417       0       0   10000       0       0       000000000D   2543
     144       0       0       1       0                PartBody       0D   2544
     108    8418       0       0       0       0       0       001010001D   2545
     108       0       0       2       0                               0D   2546
     110    8420       0       0       0       0       0       001010001D   2547
     110       0       0       2       0                               0D   2548
     110    8422       0       0       0       0       0       001010001D   2549
     110       0       0       2       0                               0D   2550
     110    8424       0       0       0       0       0       001010001D   2551
     110       0       0       2       0                               0D   2552
     110    8426       0       0       0       0       0       001010001D   2553
     110       0       0       2       0                               0D   2554
     102    8428       0       0       0       0       0       001010001D   2555
     102       0       0       1       0                               0D   2556
     142    8429       0       0       0       0       0       001010001D   2557
     142       0       0       1       0                               0D   2558
     144    8430       0       0   10000       0       0       000000000D   2559
     144       0       0       1       0                PartBody       0D   2560
     108    8431       0       0       0       0       0       001010001D   2561
     108       0       0       2       0                               0D   2562
     110    8433       0       0       0       0       0       001010001D   2563
     110       0       0       2       0                               0D   2564
     110    8435       0       0       0       0       0       001010001D   2565
     110       0       0       2       0                               0D   2566
     110    8437       0       0       0       0       0       001010001D   2567
     110       0       0       2       0                               0D   2568
     110    8439       0       0       0       0       0       001010001D   2569
     110       0       0       2       0                               0D   2570
     102    8441       0       0       0       0       0       001010001D   2571
     102       0       0       1       0                               0D   2572
     142    8442       0       0       0       0       0       001010001D   2573
     142       0       0       1       0                               0D   2574
     144    8443       0       0   10000       0       0       000000000D   2575
     144       0       0       1       0                PartBody       0D   2576
     108    8444       0       0       0       0       0       001010001D   2577
     108       0       0       2       0                               0D   2578
     110    8446       0       0       0       0       0       001010001D   2579
     110       0       0       2       0                               0D   2580
     110    8448       0       0       0       0       0       001010001D   2581
     110       0       0       2       0                               0D   2582
     110    8450       0       0       0       0       0       001010001D   2583
     110       0       0       2       0                               0D   2584
     110    8452       0       0       0       0       0       001010001D   2585
     110       0       0       2       0                               0D   2586
     102    8454       0       0       0       0       0       001010001D   2587
     102       0       0       1       0                               0D   2588
     142    8455       0       0       0       0       0       001010001D   2589
     142       0       0       1       0                               0D   2590
     144    8456       0       0   10000       0       0       000000000D   2591
     144       0       0       1       0                PartBody       0D   2592
     110    8457       0       0       0       0       0       001010001D   2593
     110       0       0       2       0                               0D   2594
     110    8459       0       0       0       0       0       001010001D   2595
     110       0       0       2       0                               0D   2596
     110    8461       0       0       0       0       0       001010001D   2597
     110       0       0       2       0                               0D   2598
     110    8463       0       0       0       0       0       001010001D   2599
     110       0       0       2       0                               0D   2600
     110    8465       0       0       0       0       0       001010001D   2601
     110       0       0       2       0                               0D   2602
     110    8467       0       0       0       0       0       001010001D   2603
     110       0       0       2       0                               0D   2604
     110    8469       0       0       0       0       0       001010001D   2605
     110       0       0       2       0                               0D   2606
     110    8471       0       0       0       0       0       001010001D   2607
     110       0       0       2       0                               0D   2608
     110    8473       0       0       0       0       0       001010001D   2609
     110       0       0       2       0                               0D   2610
     110    8475       0       0       0       0       0       001010001D   2611
     110       0       0       2       0                               0D   2612
     110    8477       0       0       0       0       0       001010001D   2613
     110       0       0       2       0                               0D   2614
     110    8479       0       0       0       0       0       001010001D   2615
     110       0       0       2       0                               0D   2616
     102    8481       0       0       0       0       0       001010001D   2617
     102       0       0       2       0                               0D   2618
     142    8483       0       0       0       0       0       001010001D   2619
     142       0       0       1       0                               0D   2620
     144    8484       0       0   10000       0       0       000000000D   2621
     144       0       0       1       0                PartBody       0D   2622
     108    8485       0       0       0       0       0       001010001D   2623
     108       0       0       2       0                               0D   2624
     110    8487       0       0       0       0       0       001010001D   2625
     110       0       0       2       0                               0D   2626
     110    8489       0       0       0       0       0       001010001D   2627
     110       0       0       2       0                               0D   2628
     110    8491       0       0       0       0       0       001010001D   2629
     110       0       0       2       0                               0D   2630
     110    8493       0       0       0       0       0       001010001D   2631
     110       0       0       2       0                               0D   2632
     102    8495       0       0       0       0       0       001010001D   2633
     102       0       0       1       0                               0D   2634
     142    8496       0       0       0       0       0       001010001D   2635
     142       0       0       1       0                               0D   2636
     144    8497       0       0   10000       0       0       000000000D   2637
     144       0       0       1       0                PartBody       0D   2638
     108    8498       0       0       0       0       0       001010001D   2639
     108       0       0       2       0                               0D   2640
     110    8500       0       0       0       0       0       001010001D   2641
     110       0       0       2       0                               0D   2642
     110    8502       0       0       0       0       0       001010001D   2643
     110       0       0       2       0                               0D   2644
     110    8504       0       0       0       0       0       001010001D   2645
     110       0       0       2       0                               0D   2646
     110    8506       0       0       0       0       0       001010001D   2647
     110       0       0       2       0                               0D   2648
     102    8508       0       0       0       0       0       001010001D   2649
     102       0       0       1       0                               0D   2650
     142    8509       0       0       0       0       0       001010001D   2651
     142       0       0       1       0                               0D   2652
     144    8510       0       0   10000       0       0       000000000D   2653
     144       0       0       1       0                PartBody       0D   2654
     108    8511       0       0       0       0       0       001010001D   2655
     108       0       0       2       0                               0D   2656
     110    8513       0       0       0       0       0       001010001D   2657
     110       0       0       2       0                               0D   2658
     110    8515       0       0       0       0       0       001010001D   2659
     110       0       0       2       0                               0D   2660
     110    8517       0       0       0       0       0       001010001D   2661
     110       0       0       2       0                               0D   2662
     110    8519       0       0       0       0       0       001010001D   2663
     110       0       0       2       0                               0D   2664
     102    8521       0       0       0       0       0       001010001D   2665
     102       0       0       1       0                               0D   2666
     142    8522       0       0       0       0       0       001010001D   2667
     142       0       0       1       0                               0D   2668
     144    8523       0       0   10000       0       0       000000000D   2669
     144       0       0       1       0                PartBody       0D   2670
     108    8524       0       0       0       0       0       001010001D   2671
     108       0       0       2       0                               0D   2672
     110    8526       0       0       0       0       0       001010001D   2673
     110       0       0       2       0                               0D   2674
     110    8528       0       0       0       0       0       001010001D   2675
     110       0       0       2       0                               0D   2676
     110    8530       0       0       0       0       0       001010001D   2677
     110       0       0       2       0                               0D   2678
     110    8532       0       0       0       0       0       001010001D   2679
     110       0       0       2       0                               0D   2680
     102    8534       0       0       0       0       0       001010001D   2681
     102       0       0       1       0                               0D   2682
     142    8535       0       0       0       0       0       001010001D   2683
     142       0       0       1       0                               0D   2684
     144    8536       0       0   10000       0       0       000000000D   2685
     144       0       0       1       0                PartBody       0D   2686
     108    8537       0       0       0       0       0       001010001D   2687
     108       0       0       2       0                               0D   2688
     110    8539       0       0       0       0       0       001010001D   2689
     110       0       0       2       0                               0D   2690
     110    8541       0       0       0       0       0       001010001D   2691
     110       0       0       2       0                               0D   2692
     110    8543       0       0       0       0       0       001010001D   2693
     110       0       0       2       0                               0D   2694
     110    8545       0       0       0       0       0       001010001D   2695
     110       0       0       2       0                               0D   2696
     102    8547       0       0       0       0       0       001010001D   2697
     102       0       0       1       0                               0D   2698
     142    8548       0       0       0       0       0       001010001D   2699
     142       0       0       1       0                               0D   2700
     144    8549       0       0   10000       0       0       000000000D   2701
     144       0       0       1       0                PartBody       0D   2702
     108    8550       0       0       0       0       0       001010001D   2703
     108       0       0       2       0                               0D   2704
     110    8552       0       0       0       0       0       001010001D   2705
     110       0       0       2       0                               0D   2706
     110    8554       0       0       0       0       0       001010001D   2707
     110       0       0       2       0                               0D   2708
     110    8556       0       0       0       0       0       001010001D   2709
     110       0       0       2       0                               0D   2710
     110    8558       0       0       0       0       0       001010001D   2711
     110       0       0       2       0                               0D   2712
     102    8560       0       0       0       0       0       001010001D   2713
     102       0       0       1       0                               0D   2714
     142    8561       0       0       0       0       0       001010001D   2715
     142       0       0       1       0                               0D   2716
     144    8562       0       0   10000       0       0       000000000D   2717
     144       0       0       1       0                PartBody       0D   2718
     110    8563       0       0       0       0       0       001010001D   2719
     110       0       0       2       0                               0D   2720
     110    8565       0       0       0       0       0       001010001D   2721
     110       0       0       2       0                               0D   2722
     110    8567       0       0       0       0       0       001010001D   2723
     110       0       0       2       0                               0D   2724
     110    8569       0       0       0       0       0       001010001D   2725
     110       0       0       2       0                               0D   2726
     102    8571       0       0       0       0       0       001010001D   2727
     102       0       0       1       0                               0D   2728
     142    8572       0       0       0       0       0       001010001D   2729
     142       0       0       1       0                               0D   2730
     144    8573       0       0   10000       0       0       000000000D   2731
     144       0       0       1       0                PartBody       0D   2732
     108    8574       0       0       0       0       0       001010001D   2733
     108       0       0       2       0                               0D   2734
     110    8576       0       0       0       0       0       001010001D   2735
     110       0       0       2       0                               0D   2736
     110    8578       0       0       0       0       0       001010001D   2737
     110       0       0       2       0                               0D   2738
     110    8580       0       0       0       0       0       001010001D   2739
     110       0       0       2       0                               0D   2740
     110    8582       0       0       0       0       0       001010001D   2741
     110       0       0       2       0                               0D   2742
     102    8584       0       0       0       0       0       001010001D   2743
     102       0       0       1       0                               0D   2744
     142    8585       0       0       0       0       0       001010001D   2745
     142       0       0       1       0                               0D   2746
     144    8586       0       0   10000       0       0       000000000D   2747
     144       0       0       1       0                PartBody       0D   2748
     108    8587       0       0       0       0       0       001010001D   2749
     108       0       0       2       0                               0D   2750
     110    8589       0       0       0       0       0       001010001D   2751
     110       0       0       2       0                               0D   2752
     110    8591       0       0       0       0       0       001010001D   2753
     110       0       0       2       0                               0D   2754
     110    8593       0       0       0       0       0       001010001D   2755
     110       0       0       2       0                               0D   2756
     110    8595       0       0       0       0       0       001010001D   2757
     110       0       0       2       0                               0D   2758
     102    8597       0       0       0       0       0       001010001D   2759
     102       0       0       1       0                               0D   2760
     142    8598       0       0       0       0       0       001010001D   2761
     142       0       0       1       0                               0D   2762
     144    8599       0       0   10000       0       0       000000000D   2763
     144       0       0       1       0                PartBody       0D   2764
     108    8600       0       0       0       0       0       001010001D   2765
     108       0       0       2       0                               0D   2766
     110    8602       0       0       0       0       0       001010001D   2767
     110       0       0       2       0                               0D   2768
     110    8604       0       0       0       0       0       001010001D   2769
     110       0       0       2       0                               0D   2770
     110    8606       0       0       0       0       0       001010001D   2771
     110       0       0       2       0                               0D   2772
     110    8608       0       0       0       0       0       001010001D   2773
     110       0       0       2       0                               0D   2774
     102    8610       0       0       0       0       0       001010001D   2775
     102       0       0       1       0                               0D   2776
     142    8611       0       0       0       0       0       001010001D   2777
     142       0       0       1       0                               0D   2778
     144    8612       0       0   10000       0       0       000000000D   2779
     144       0       0       1       0                PartBody       0D   2780
     108    8613       0       0       0       0       0       001010001D   2781
     108       0       0       2       0                               0D   2782
     110    8615       0       0       0       0       0       001010001D   2783
     110       0       0       2       0                               0D   2784
     110    8617       0       0       0       0       0       001010001D   2785
     110       0       0       2       0                               0D   2786
     110    8619       0       0       0       0       0       001010001D   2787
     110       0       0       2       0                               0D   2788
     110    8621       0       0       0       0       0       001010001D   2789
     110       0       0       2       0                               0D   2790
     102    8623       0       0       0       0       0       001010001D   2791
     102       0       0       1       0                               0D   2792
     142    8624       0       0       0       0       0       001010001D   2793
     142       0       0       1       0                               0D   2794
     144    8625       0       0   10000       0       0       000000000D   2795
     144       0       0       1       0                PartBody       0D   2796
     108    8626       0       0       0       0       0       001010001D   2797
     108       0       0       2       0                               0D   2798
     110    8628       0       0       0       0       0       001010001D   2799
     110       0       0       2       0                               0D   2800
     110    8630       0       0       0       0       0       001010001D   2801
     110       0       0       2       0                               0D   2802
     110    8632       0       0       0       0       0       001010001D   2803
     110       0       0       2       0                               0D   2804
     110    8634       0       0       0       0       0       001010001D   2805
     110       0       0       2       0                               0D   2806
     102    8636       0       0       0       0       0       001010001D   2807
     102       0       0       1       0                               0D   2808
     142    8637       0       0       0       0       0       001010001D   2809
     142       0       0       1       0                               0D   2810
     144    8638       0       0   10000       0       0       000000000D   2811
     144       0       0       1       0                PartBody       0D   2812
     110    8639       0       0       0       0       0       001010001D   2813
     110       0       0       2       0                               0D   2814
     110    8641       0       0       0       0       0       001010001D   2815
     110       0       0       2       0                               0D   2816
     110    8643       0       0       0       0       0       001010001D   2817
     110       0       0       2       0                               0D   2818
     110    8645       0       0       0       0       0       001010001D   2819
     110       0       0       2       0                               0D   2820
     110    8647       0       0       0       0       0       001010001D   2821
     110       0       0       2       0                               0D   2822
     110    8649       0       0       0       0       0       001010001D   2823
     110       0       0       2       0                               0D   2824
     110    8651       0       0       0       0       0       001010001D   2825
     110       0       0       2       0                               0D   2826
     110    8653       0       0       0       0       0       001010001D   2827
     110       0       0       2       0                               0D   2828
     110    8655       0       0       0       0       0       001010001D   2829
     110       0       0       2       0                               0D   2830
     110    8657       0       0       0       0       0       001010001D   2831
     110       0       0       2       0                               0D   2832
     102    8659       0       0       0       0       0       001010001D   2833
     102       0       0       1       0                               0D   2834
     142    8660       0       0       0       0       0       001010001D   2835
     142       0       0       1       0                               0D   2836
     144    8661       0       0   10000       0       0       000000000D   2837
     144       0       0       1       0                PartBody       0D   2838
     108    8662       0       0       0       0       0       001010001D   2839
     108       0       0       2       0                               0D   2840
     110    8664       0       0       0       0       0       001010001D   2841
     110       0       0       2       0                               0D   2842
     110    8666       0       0       0       0       0       001010001D   2843
     110       0       0       2       0                               0D   2844
     110    8668       0       0       0       0       0       001010001D   2845
     110       0       0       2       0                               0D   2846
     110    8670       0       0       0       0       0       001010001D   2847
     110       0       0       2       0                               0D   2848
     102    8672       0       0       0       0       0       001010001D   2849
     102       0       0       1       0                               0D   2850
     142    8673       0       0       0       0       0       001010001D   2851
     142       0       0       1       0                               0D   2852
     144    8674       0       0   10000       0       0       000000000D   2853
     144       0       0       1       0                PartBody       0D   2854
     108    8675       0       0       0       0       0       001010001D   2855
     108       0       0       2       0                               0D   2856
     110    8677       0       0       0       0       0       001010001D   2857
     110       0       0       2       0                               0D   2858
     110    8679       0       0       0       0       0       001010001D   2859
     110       0       0       2       0                               0D   2860
     110    8681       0       0       0       0       0       001010001D   2861
     110       0       0       2       0                               0D   2862
     110    8683       0       0       0       0       0       001010001D   2863
     110       0       0       2       0                               0D   2864
     102    8685       0       0       0       0       0       001010001D   2865
     102       0       0       1       0                               0D   2866
     142    8686       0       0       0       0       0       001010001D   2867
     142       0       0       1       0                               0D   2868
     144    8687       0       0   10000       0       0       000000000D   2869
     144       0       0       1       0                PartBody       0D   2870
     108    8688       0       0       0       0       0       001010001D   2871
     108       0       0       2       0                               0D   2872
     110    8690       0       0       0       0       0       001010001D   2873
     110       0       0       2       0                               0D   2874
     110    8692       0       0       0       0       0       001010001D   2875
     110       0       0       2       0                               0D   2876
     110    8694       0       0       0       0       0       001010001D   2877
     110       0       0       2       0                               0D   2878
     110    8696       0       0       0       0       0       001010001D   2879
     110       0       0       2       0                               0D   2880
     102    8698       0       0       0       0       0       001010001D   2881
     102       0       0       1       0                               0D   2882
     142    8699       0       0       0       0       0       001010001D   2883
     142       0       0       1       0                               0D   2884
     144    8700       0       0   10000       0       0       000000000D   2885
     144       0       0       1       0                PartBody       0D   2886
     108    8701       0       0       0       0       0       001010001D   2887
     108       0       0       2       0                               0D   2888
     110    8703       0       0       0       0       0       001010001D   2889
     110       0       0       2       0                               0D   2890
     110    8705       0       0       0       0       0       001010001D   2891
     110       0       0       2       0                               0D   2892
     110    8707       0       0       0       0       0       001010001D   2893
     110       0       0       2       0                               0D   2894
     110    8709       0       0       0       0       0       001010001D   2895
     110       0       0       2       0                               0D   2896
     102    8711       0       0       0       0       0       001010001D   2897
     102       0       0       1       0                               0D   2898
     142    8712       0       0       0       0       0       001010001D   2899
     142       0       0       1       0                               0D   2900
     144    8713       0       0   10000       0       0       000000000D   2901
     144       0       0       1       0                PartBody       0D   2902
     108    8714       0       0       0       0       0       001010001D   2903
     108       0       0       2       0                               0D   2904
     110    8716       0       0       0       0       0       001010001D   2905
     110       0       0       2       0                               0D   2906
     110    8718       0       0       0       0       0       001010001D   2907
     110       0       0       2       0                               0D   2908
     110    8720       0       0       0       0       0       001010001D   2909
     110       0       0       2       0                               0D   2910
     110    8722       0       0       0       0       0       001010001D   2911
     110       0       0       2       0                               0D   2912
     102    8724       0       0       0       0       0       001010001D   2913
     102       0       0       1       0                               0D   2914
     142    8725       0       0       0       0       0       001010001D   2915
     142       0       0       1       0                               0D   2916
     144    8726       0       0   10000       0       0       000000000D   2917
     144       0       0       1       0                PartBody       0D   2918
     108    8727       0       0       0       0       0       001010001D   2919
     108       0       0       2       0                               0D   2920
     110    8729       0       0       0       0       0       001010001D   2921
     110       0       0       2       0                               0D   2922
     110    8731       0       0       0       0       0       001010001D   2923
     110       0       0       2       0                               0D   2924
     110    8733       0       0       0       0       0       001010001D   2925
     110       0       0       2       0                               0D   2926
     110    8735       0       0       0       0       0       001010001D   2927
     110       0       0       2       0                               0D   2928
     102    8737       0       0       0       0       0       001010001D   2929
     102       0       0       1       0                               0D   2930
     142    8738       0       0       0       0       0       001010001D   2931
     142       0       0       1       0                               0D   2932
     144    8739       0       0   10000       0       0       000000000D   2933
     144       0       0       1       0                PartBody       0D   2934
     108    8740       0       0       0       0       0       001010001D   2935
     108       0       0       2       0                               0D   2936
     110    8742       0       0       0       0       0       001010001D   2937
     110       0       0       2       0                               0D   2938
     110    8744       0       0       0       0       0       001010001D   2939
     110       0       0       2       0                               0D   2940
     110    8746       0       0       0       0       0       001010001D   2941
     110       0       0       2       0                               0D   2942
     110    8748       0       0       0       0       0       001010001D   2943
     110       0       0       2       0                               0D   2944
     102    8750       0       0       0       0       0       001010001D   2945
     102       0       0       1       0                               0D   2946
     142    8751       0       0       0       0       0       001010001D   2947
     142       0       0       1       0                               0D   2948
     144    8752       0       0   10000       0       0       000000000D   2949
     144       0       0       1       0                PartBody       0D   2950
     108    8753       0       0       0       0       0       001010001D   2951
     108       0       0       2       0                               0D   2952
     110    8755       0       0       0       0       0       001010001D   2953
     110       0       0       2       0                               0D   2954
     110    8757       0       0       0       0       0       001010001D   2955
     110       0       0       2       0                               0D   2956
     110    8759       0       0       0       0       0       001010001D   2957
     110       0       0       2       0                               0D   2958
     110    8761       0       0       0       0       0       001010001D   2959
     110       0       0       2       0                               0D   2960
     102    8763       0       0       0       0       0       001010001D   2961
     102       0       0       1       0                               0D   2962
     142    8764       0       0       0       0       0       001010001D   2963
     142       0       0       1       0                               0D   2964
     144    8765       0       0   10000       0       0       000000000D   2965
     144       0       0       1       0                PartBody       0D   2966
     108    8766       0       0       0       0       0       001010001D   2967
     108       0       0       2       0                               0D   2968
     110    8768       0       0       0       0       0       001010001D   2969
     110       0       0       2       0                               0D   2970
     110    8770       0       0       0       0       0       001010001D   2971
     110       0       0       2       0                               0D   2972
     110    8772       0       0       0       0       0       001010001D   2973
     110       0       0       2       0                               0D   2974
     110    8774       0       0       0       0       0       001010001D   2975
     110       0       0       2       0                               0D   2976
     102    8776       0       0       0       0       0       001010001D   2977
     102       0       0       1       0                               0D   2978
     142    8777       0       0       0       0       0       001010001D   2979
     142       0       0       1       0                               0D   2980
     144    8778       0       0   10000       0       0       000000000D   2981
     144       0       0       1       0                PartBody       0D   2982
     108    8779       0       0       0       0       0       001010001D   2983
     108       0       0       2       0                               0D   2984
     110    8781       0       0       0       0       0       001010001D   2985
     110       0       0       2       0                               0D   2986
     110    8783       0       0       0       0       0       001010001D   2987
     110       0       0       2       0                               0D   2988
     110    8785       0       0       0       0       0       001010001D   2989
     110       0       0       2       0                               0D   2990
     110    8787       0       0       0       0       0       001010001D   2991
     110       0       0       2       0                               0D   2992
     102    8789       0       0       0       0       0       001010001D   2993
     102       0       0       1       0                               0D   2994
     142    8790       0       0       0       0       0       001010001D   2995
     142       0       0       1       0                               0D   2996
     144    8791       0       0   10000       0       0       000000000D   2997
     144       0       0       1       0                PartBody       0D   2998
     110    8792       0       0       0       0       0       001010001D   2999
     110       0       0       2       0                               0D   3000
     110    8794       0       0       0       0       0       001010001D   3001
     110       0       0       2       0                               0D   3002
     110    8796       0       0       0       0       0       001010001D   3003
     110       0       0       2       0                               0D   3004
     110    8798       0       0       0       0       0       001010001D   3005
     110       0       0       2       0                               0D   3006
     110    8800       0       0       0       0       0       001010001D   3007
     110       0       0       2       0                               0D   3008
     110    8802       0       0       0       0       0       001010001D   3009
     110       0       0       2       0                               0D   3010
     110    8804       0       0       0       0       0       001010001D   3011
     110       0       0       2       0                               0D   3012
     110    8806       0       0       0       0       0       001010001D   3013
     110       0       0       2       0                               0D   3014
     110    8808       0       0       0       0       0       001010001D   3015
     110       0       0       2       0                               0D   3016
     110    8810       0       0       0       0       0       001010001D   3017
     110       0       0       2       0                               0D   3018
     110    8812       0       0       0       0       0       001010001D   3019
     110       0       0       2       0                               0D   3020
     110    8814       0       0       0       0       0       001010001D   3021
     110       0       0       2       0                               0D   3022
     110    8816       0       0       0       0       0       001010001D   3023
     110       0       0       2       0                               0D   3024
     110    8818       0       0       0       0       0       001010001D   3025
     110       0       0       2       0                               0D   3026
     110    8820       0       0       0       0       0       001010001D   3027
     110       0       0       2       0                               0D   3028
     110    8822       0       0       0       0       0       001010001D   3029
     110       0       0       2       0                               0D   3030
     110    8824       0       0       0       0       0       001010001D   3031
     110       0       0       2       0                               0D   3032
     102    8826       0       0       0       0       0       001010001D   3033
     102       0       0       2       0                               0D   3034
     142    8828       0       0       0       0       0       001010001D   3035
     142       0       0       1       0                               0D   3036
     110    8829       0       0       0       0       0       001010001D   3037
     110       0       0       2       0                               0D   3038
     110    8831       0       0       0       0       0       001010001D   3039
     110       0       0       2       0                               0D   3040
     110    8833       0       0       0       0       0       001010001D   3041
     110       0       0       2       0                               0D   3042
     110    8835       0       0       0       0       0       001010001D   3043
     110       0       0       2       0                               0D   3044
     110    8837       0       0       0       0       0       001010001D   3045
     110       0       0       2       0                               0D   3046
     110    8839       0       0       0       0       0       001010001D   3047
     110       0       0       2       0                               0D   3048
     110    8841       0       0       0       0       0       001010001D   3049
     110       0       0       2       0                               0D   3050
     110    8843       0       0       0       0       0       001010001D   3051
     110       0       0       2       0                               0D   3052
     110    8845       0       0       0       0       0       001010001D   3053
     110       0       0       2       0                               0D   3054
     110    8847       0       0       0       0       0       001010001D   3055
     110       0       0       2       0                               0D   3056
     110    8849       0       0       0       0       0       001010001D   3057
     110       0       0       2       0                               0D   3058
     110    8851       0       0       0       0       0       001010001D   3059
     110       0       0       2       0                               0D   3060
     110    8853       0       0       0       0       0       001010001D   3061
     110       0       0       2       0                               0D   3062
     110    8855       0       0       0       0       0       001010001D   3063
     110       0       0       2       0                               0D   3064
     110    8857       0       0       0       0       0       001010001D   3065
     110       0       0       2       0                               0D   3066
     110    8859       0       0       0       0       0       001010001D   3067
     110       0       0       2       0                               0D   3068
     102    8861       0       0       0       0       0       001010001D   3069
     102       0       0       2       0                               0D   3070
     142    8863       0       0       0       0       0       001010001D   3071
     142       0       0       1       0                               0D   3072
     144    8864       0       0   10000       0       0       000000000D   3073
     144       0       0       1       0                PartBody       0D   3074
     108    8865       0       0       0       0       0       001010001D   3075
     108       0       0       2       0                               0D   3076
     110    8867       0       0       0       0       0       001010001D   3077
     110       0       0       2       0                               0D   3078
     110    8869       0       0       0       0       0       001010001D   3079
     110       0       0       2       0                               0D   3080
     110    8871       0       0       0       0       0       001010001D   3081
     110       0       0       2       0                               0D   3082
     110    8873       0       0       0       0       0       001010001D   3083
     110       0       0       2       0                               0D   3084
     102    8875       0       0       0       0       0       001010001D   3085
     102       0       0       1       0                               0D   3086
     142    8876       0       0       0       0       0       001010001D   3087
     142       0       0       1       0                               0D   3088
     144    8877       0       0   10000       0       0       000000000D   3089
     144       0       0       1       0                PartBody       0D   3090
     108    8878       0       0       0       0       0       001010001D   3091
     108       0       0       2       0                               0D   3092
     110    8880       0       0       0       0       0       001010001D   3093
     110       0       0       2       0                               0D   3094
     110    8882       0       0       0       0       0       001010001D   3095
     110       0       0       2       0                               0D   3096
     110    8884       0       0       0       0       0       001010001D   3097
     110       0       0       2       0                               0D   3098
     110    8886       0       0       0       0       0       001010001D   3099
     110       0       0       2       0                               0D   3100
     102    8888       0       0       0       0       0       001010001D   3101
     102       0       0       1       0                               0D   3102
     142    8889       0       0       0       0       0       001010001D   3103
     142       0       0       1       0                               0D   3104
     144    8890       0       0   10000       0       0       000000000D   3105
     144       0       0       1       0                PartBody       0D   3106
     108    8891       0       0       0       0       0       001010001D   3107
     108       0       0       2       0                               0D   3108
     110    8893       0       0       0       0       0       001010001D   3109
     110       0       0       2       0                               0D   3110
     110    8895       0       0       0       0       0       001010001D   3111
     110       0       0       2       0                               0D   3112
     110    8897       0       0       0       0       0       001010001D   3113
     110       0       0       2       0                               0D   3114
     110    8899       0       0       0       0       0       001010001D   3115
     110       0       0       2       0                               0D   3116
     102    8901       0       0       0       0       0       001010001D   3117
     102       0       0       1       0                               0D   3118
     142    8902       0       0       0       0       0       001010001D   3119
     142       0       0       1       0                               0D   3120
     144    8903       0       0   10000       0       0       000000000D   3121
     144       0       0       1       0                PartBody       0D   3122
     108    8904       0       0       0       0       0       001010001D   3123
     108       0       0       2       0                               0D   3124
     110    8906       0       0       0       0       0       001010001D   3125
     110       0       0       2       0                               0D   3126
     110    8908       0       0       0       0       0       001010001D   3127
     110       0       0       2       0                               0D   3128
     110    8910       0       0       0       0       0       001010001D   3129
     110       0       0       2       0                               0D   3130
     110    8912       0       0       0       0       0       001010001D   3131
     110       0       0       2       0                               0D   3132
     102    8914       0       0       0       0       0       001010001D   3133
     102       0       0       1       0                               0D   3134
     142    8915       0       0       0       0       0       001010001D   3135
     142       0       0       1       0                               0D   3136
     144    8916       0       0   10000       0       0       000000000D   3137
     144       0       0       1       0                PartBody       0D   3138
     108    8917       0       0       0       0       0       001010001D   3139
     108       0       0       2       0                               0D   3140
     110    8919       0       0       0       0       0       001010001D   3141
     110       0       0       2       0                               0D   3142
     110    8921       0       0       0       0       0       001010001D   3143
     110       0       0       2       0                               0D   3144
     110    8923       0       0       0       0       0       001010001D   3145
     110       0       0       2       0                               0D   3146
     110    8925       0       0       0       0       0       001010001D   3147
     110       0       0       2       0                               0D   3148
     102    8927       0       0       0       0       0       001010001D   3149
     102       0       0       1       0                               0D   3150
     142    8928       0       0       0       0       0       001010001D   3151
     142       0       0       1       0                               0D   3152
     144    8929       0       0   10000       0       0       000000000D   3153
     144       0       0       1       0                PartBody       0D   3154
     108    8930       0       0       0       0       0       001010001D   3155
     108       0       0       2       0                               0D   3156
     110    8932       0       0       0       0       0       001010001D   3157
     110       0       0       2       0                               0D   3158
     110    8934       0       0       0       0       0       001010001D   3159
     110       0       0       2       0                               0D   3160
     110    8936       0       0       0       0       0       001010001D   3161
     110       0       0       2       0                               0D   3162
     110    8938       0       0       0       0       0       001010001D   3163
     110       0       0       2       0                               0D   3164
     102    8940       0       0       0       0       0       001010001D   3165
     102       0       0       1       0                               0D   3166
     142    8941       0       0       0       0       0       001010001D   3167
     142       0       0       1       0                               0D   3168
     144    8942       0       0   10000       0       0       000000000D   3169
     144       0       0       1       0                PartBody       0D   3170
     108    8943       0       0       0       0       0       001010001D   3171
     108       0       0       2       0                               0D   3172
     110    8945       0       0       0       0       0       001010001D   3173
     110       0       0       2       0                               0D   3174
     110    8947       0       0       0       0       0       001010001D   3175
     110       0       0       2       0                               0D   3176
     110    8949       0       0       0       0       0       001010001D   3177
     110       0       0       2       0                               0D   3178
     110    8951       0       0       0       0       0       001010001D   3179
     110       0       0       2       0                               0D   3180
     102    8953       0       0       0       0       0       001010001D   3181
     102       0       0       1       0                               0D   3182
     142    8954       0       0       0       0       0       001010001D   3183
     142       0       0       1       0                               0D   3184
     144    8955       0       0   10000       0       0       000000000D   3185
     144       0       0       1       0                PartBody       0D   3186
     108    8956       0       0       0       0       0       001010001D   3187
     108       0       0       2       0                               0D   3188
     110    8958       0       0       0       0       0       001010001D   3189
     110       0       0       2       0                               0D   3190
     110    8960       0       0       0       0       0       001010001D   3191
     110       0       0       2       0                               0D   3192
     110    8962       0       0       0       0       0       001010001D   3193
     110       0       0       2       0                               0D   3194
     110    8964       0       0       0       0       0       001010001D   3195
     110       0       0       2       0                               0D   3196
     102    8966       0       0       0       0       0       001010001D   3197
     102       0       0       1       0                               0D   3198
     142    8967       0       0       0       0       0       001010001D   3199
     142       0       0       1       0                               0D   3200
     144    8968       0       0   10000       0       0       000000000D   3201
     144       0       0       1       0                PartBody       0D   3202
     108    8969       0       0       0       0       0       001010001D   3203
     108       0       0       2       0                               0D   3204
     110    8971       0       0       0       0       0       001010001D   3205
     110       0       0       2       0                               0D   3206
     110    8973       0       0       0       0       0       001010001D   3207
     110       0       0       2       0                               0D   3208
     110    8975       0       0       0       0       0       001010001D   3209
     110       0       0       2       0                               0D   3210
     110    8977       0       0       0       0       0       001010001D   3211
     110       0       0       2       0                               0D   3212
     102    8979       0       0       0       0       0       001010001D   3213
     102       0       0       1       0                               0D   3214
     142    8980       0       0       0       0       0       001010001D   3215
     142       0       0       1       0                               0D   3216
     144    8981       0       0   10000       0       0       000000000D   3217
     144       0       0       1       0                PartBody       0D   3218
     108    8982       0       0       0       0       0       001010001D   3219
     108       0       0       2       0                               0D   3220
     110    8984       0       0       0       0       0       001010001D   3221
     110       0       0       2       0                               0D   3222
     110    8986       0       0       0       0       0       001010001D   3223
     110       0       0       2       0                               0D   3224
     110    8988       0       0       0       0       0       001010001D   3225
     110       0       0       2       0                               0D   3226
     110    8990       0       0       0       0       0       001010001D   3227
     110       0       0       2       0                               0D   3228
     102    8992       0       0       0       0       0       001010001D   3229
     102       0       0       1       0                               0D   3230
     142    8993       0       0       0       0       0       001010001D   3231
     142       0       0       1       0                               0D   3232
     144    8994       0       0   10000       0       0       000000000D   3233
     144       0       0       1       0                PartBody       0D   3234
     108    8995       0       0       0       0       0       001010001D   3235
     108       0       0       2       0                               0D   3236
     110    8997       0       0       0       0       0       001010001D   3237
     110       0       0       2       0                               0D   3238
     110    8999       0       0       0       0       0       001010001D   3239
     110       0       0       2       0                               0D   3240
     110    9001       0       0       0       0       0       001010001D   3241
     110       0       0       2       0                               0D   3242
     110    9003       0       0       0       0       0       001010001D   3243
     110       0       0       2       0                               0D   3244
     102    9005       0       0       0       0       0       001010001D   3245
     102       0       0       1       0                               0D   3246
     142    9006       0       0       0       0       0       001010001D   3247
     142       0       0       1       0                               0D   3248
     144    9007       0       0   10000       0       0       000000000D   3249
     144       0       0       1       0                PartBody       0D   3250
     108    9008       0       0       0       0       0       001010001D   3251
     108       0       0       2       0                               0D   3252
     110    9010       0       0       0       0       0       001010001D   3253
     110       0       0       2       0                               0D   3254
     110    9012       0       0       0       0       0       001010001D   3255
     110       0       0       2       0                               0D   3256
     110    9014       0       0       0       0       0       001010001D   3257
     110       0       0       2       0                               0D   3258
     110    9016       0       0       0       0       0       001010001D   3259
     110       0       0       2       0                               0D   3260
     102    9018       0       0       0       0       0       001010001D   3261
     102       0       0       1       0                               0D   3262
     142    9019       0       0       0       0       0       001010001D   3263
     142       0       0       1       0                               0D   3264
     144    9020       0       0   10000       0       0       000000000D   3265
     144       0       0       1       0                PartBody       0D   3266
     108    9021       0       0       0       0       0       001010001D   3267
     108       0       0       2       0                               0D   3268
     110    9023       0       0       0       0       0       001010001D   3269
     110       0       0       2       0                               0D   3270
     110    9025       0       0       0       0       0       001010001D   3271
     110       0       0       2       0                               0D   3272
     110    9027       0       0       0       0       0       001010001D   3273
     110       0       0       2       0                               0D   3274
     110    9029       0       0       0       0       0       001010001D   3275
     110       0       0       2       0                               0D   3276
     102    9031       0       0       0       0       0       001010001D   3277
     102       0       0       1       0                               0D   3278
     142    9032       0       0       0       0       0       001010001D   3279
     142       0       0       1       0                               0D   3280
     144    9033       0       0   10000       0       0       000000000D   3281
     144       0       0       1       0                PartBody       0D   3282
     108    9034       0       0       0       0       0       001010001D   3283
     108       0       0       2       0                               0D   3284
     110    9036       0       0       0       0       0       001010001D   3285
     110       0       0       2       0                               0D   3286
     110    9038       0       0       0       0       0       001010001D   3287
     110       0       0       2       0                               0D   3288
     110    9040       0       0       0       0       0       001010001D   3289
     110       0       0       2       0                               0D   3290
     110    9042       0       0       0       0       0       001010001D   3291
     110       0       0       2       0                               0D   3292
     102    9044       0       0       0       0       0       001010001D   3293
     102       0       0       1       0                               0D   3294
     142    9045       0       0       0       0       0       001010001D   3295
     142       0       0       1       0                               0D   3296
     144    9046       0       0   10000       0       0       000000000D   3297
     144       0       0       1       0                PartBody       0D   3298
     108    9047       0       0       0       0       0       001010001D   3299
     108       0       0       2       0                               0D   3300
     110    9049       0       0       0       0       0       001010001D   3301
     110       0       0       2       0                               0D   3302
     110    9051       0       0       0       0       0       001010001D   3303
     110       0       0       2       0                               0D   3304
     110    9053       0       0       0       0       0       001010001D   3305
     110       0       0       2       0                               0D   3306
     110    9055       0       0       0       0       0       001010001D   3307
     110       0       0       2       0                               0D   3308
     102    9057       0       0       0       0       0       001010001D   3309
     102       0       0       1       0                               0D   3310
     142    9058       0       0       0       0       0       001010001D   3311
     142       0       0       1       0                               0D   3312
     144    9059       0       0   10000       0       0       000000000D   3313
     144       0       0       1       0                PartBody       0D   3314
     108    9060       0       0       0       0       0       001010001D   3315
     108       0       0       2       0                               0D   3316
     110    9062       0       0       0       0       0       001010001D   3317
     110       0       0       2       0                               0D   3318
     110    9064       0       0       0       0       0       001010001D   3319
     110       0       0       2       0                               0D   3320
     110    9066       0       0       0       0       0       001010001D   3321
     110       0       0       2       0                               0D   3322
     110    9068       0       0       0       0       0       001010001D   3323
     110       0       0       2       0                               0D   3324
     102    9070       0       0       0       0       0       001010001D   3325
     102       0       0       1       0                               0D   3326
     142    9071       0       0       0       0       0       001010001D   3327
     142       0       0       1       0                               0D   3328
     144    9072       0       0   10000       0       0       000000000D   3329
     144       0       0       1       0                PartBody       0D   3330
     108    9073       0       0       0       0       0       001010001D   3331
     108       0       0       2       0                               0D   3332
     110    9075       0       0       0       0       0       001010001D   3333
     110       0       0       2       0                               0D   3334
     110    9077       0       0       0       0       0       001010001D   3335
     110       0       0       2       0                               0D   3336
     110    9079       0       0       0       0       0       001010001D   3337
     110       0       0       2       0                               0D   3338
     110    9081       0       0       0       0       0       001010001D   3339
     110       0       0       2       0                               0D   3340
     102    9083       0       0       0       0       0       001010001D   3341
     102       0       0       1       0                               0D   3342
     142    9084       0       0       0       0       0       001010001D   3343
     142       0       0       1       0                               0D   3344
     144    9085       0       0   10000       0       0       000000000D   3345
     144       0       0       1       0                PartBody       0D   3346
     108    9086       0       0       0       0       0       001010001D   3347
     108       0       0       2       0                               0D   3348
     110    9088       0       0       0       0       0       001010001D   3349
     110       0       0       2       0                               0D   3350
     110    9090       0       0       0       0       0       001010001D   3351
     110       0       0       2       0                               0D   3352
     110    9092       0       0       0       0       0       001010001D   3353
     110       0       0       2       0                               0D   3354
     110    9094       0       0       0       0       0       001010001D   3355
     110       0       0       2       0                               0D   3356
     102    9096       0       0       0       0       0       001010001D   3357
     102       0       0       1       0                               0D   3358
     142    9097       0       0       0       0       0       001010001D   3359
     142       0       0       1       0                               0D   3360
     144    9098       0       0   10000       0       0       000000000D   3361
     144       0       0       1       0                PartBody       0D   3362
     108    9099       0       0       0       0       0       001010001D   3363
     108       0       0       2       0                               0D   3364
     110    9101       0       0       0       0       0       001010001D   3365
     110       0       0       2       0                               0D   3366
     110    9103       0       0       0       0       0       001010001D   3367
     110       0       0       2       0                               0D   3368
     110    9105       0       0       0       0       0       001010001D   3369
     110       0       0       2       0                               0D   3370
     110    9107       0       0       0       0       0       001010001D   3371
     110       0       0       2       0                               0D   3372
     102    9109       0       0       0       0       0       001010001D   3373
     102       0       0       1       0                               0D   3374
     142    9110       0       0       0       0       0       001010001D   3375
     142       0       0       1       0                               0D   3376
     144    9111       0       0   10000       0       0       000000000D   3377
     144       0       0       1       0                PartBody       0D   3378
     108    9112       0       0       0       0       0       001010001D   3379
     108       0       0       2       0                               0D   3380
     110    9114       0       0       0       0       0       001010001D   3381
     110       0       0       2       0                               0D   3382
     110    9116       0       0       0       0       0       001010001D   3383
     110       0       0       2       0                               0D   3384
     110    9118       0       0       0       0       0       001010001D   3385
     110       0       0       2       0                               0D   3386
     110    9120       0       0       0       0       0       001010001D   3387
     110       0       0       2       0                               0D   3388
     102    9122       0       0       0       0       0       001010001D   3389
     102       0       0       1       0                               0D   3390
     142    9123       0       0       0       0       0       001010001D   3391
     142       0       0       1       0                               0D   3392
     144    9124       0       0   10000       0       0       000000000D   3393
     144       0       0       1       0                PartBody       0D   3394
     108    9125       0       0       0       0       0       001010001D   3395
     108       0       0       2       0                               0D   3396
     110    9127       0       0       0       0       0       001010001D   3397
     110       0       0       2       0                               0D   3398
     110    9129       0       0       0       0       0       001010001D   3399
     110       0       0       2       0                               0D   3400
     110    9131       0       0       0       0       0       001010001D   3401
     110       0       0       2       0                               0D   3402
     110    9133       0       0       0       0       0       001010001D   3403
     110       0       0       2       0                               0D   3404
     102    9135       0       0       0       0       0       001010001D   3405
     102       0       0       1       0                               0D   3406
     142    9136       0       0       0       0       0       001010001D   3407
     142       0       0       1       0                               0D   3408
     144    9137       0       0   10000       0       0       000000000D   3409
     144       0       0       1       0                PartBody       0D   3410
     108    9138       0       0       0       0       0       001010001D   3411
     108       0       0       2       0                               0D   3412
     110    9140       0       0       0       0       0       001010001D   3413
     110       0       0       2       0                               0D   3414
     110    9142       0       0       0       0       0       001010001D   3415
     110       0       0       2       0                               0D   3416
     110    9144       0       0       0       0       0       001010001D   3417
     110       0       0       2       0                               0D   3418
     110    9146       0       0       0       0       0       001010001D   3419
     110       0       0       2       0                               0D   3420
     102    9148       0       0       0       0       0       001010001D   3421
     102       0       0       1       0                               0D   3422
     142    9149       0       0       0       0       0       001010001D   3423
     142       0       0       1       0                               0D   3424
     144    9150       0       0   10000       0       0       000000000D   3425
     144       0       0       1       0                PartBody       0D   3426
     108    9151       0       0       0       0       0       001010001D   3427
     108       0       0       2       0                               0D   3428
     110    9153       0       0       0       0       0       001010001D   3429
     110       0       0       2       0                               0D   3430
     110    9155       0       0       0       0       0       001010001D   3431
     110       0       0       2       0                               0D   3432
     110    9157       0       0       0       0       0       001010001D   3433
     110       0       0       2       0                               0D   3434
     110    9159       0       0       0       0       0       001010001D   3435
     110       0       0       2       0                               0D   3436
     102    9161       0       0       0       0       0       001010001D   3437
     102       0       0       1       0                               0D   3438
     142    9162       0       0       0       0       0       001010001D   3439
     142       0       0       1       0                               0D   3440
     144    9163       0       0   10000       0       0       000000000D   3441
     144       0       0       1       0                PartBody       0D   3442
     108    9164       0       0       0       0       0       001010001D   3443
     108       0       0       2       0                               0D   3444
     110    9166       0       0       0       0       0       001010001D   3445
     110       0       0       2       0                               0D   3446
     110    9168       0       0       0       0       0       001010001D   3447
     110       0       0       2       0                               0D   3448
     110    9170       0       0       0       0       0       001010001D   3449
     110       0       0       2       0                               0D   3450
     110    9172       0       0       0       0       0       001010001D   3451
     110       0       0       2       0                               0D   3452
     102    9174       0       0       0       0       0       001010001D   3453
     102       0       0       1       0                               0D   3454
     142    9175       0       0       0       0       0       001010001D   3455
     142       0       0       1       0                               0D   3456
     144    9176       0       0   10000       0       0       000000000D   3457
     144       0       0       1       0                PartBody       0D   3458
     108    9177       0       0       0       0       0       001010001D   3459
     108       0       0       2       0                               0D   3460
     110    9179       0       0       0       0       0       001010001D   3461
     110       0       0       2       0                               0D   3462
     110    9181       0       0       0       0       0       001010001D   3463
     110       0       0       2       0                               0D   3464
     110    9183       0       0       0       0       0       001010001D   3465
     110       0       0       2       0                               0D   3466
     110    9185       0       0       0       0       0       001010001D   3467
     110       0       0       2       0                               0D   3468
     102    9187       0       0       0       0       0       001010001D   3469
     102       0       0       1       0                               0D   3470
     142    9188       0       0       0       0       0       001010001D   3471
     142       0       0       1       0                               0D   3472
     144    9189       0       0   10000       0       0       000000000D   3473
     144       0       0       1       0                PartBody       0D   3474
     108    9190       0       0       0       0       0       001010001D   3475
     108       0       0       2       0                               0D   3476
     110    9192       0       0       0       0       0       001010001D   3477
     110       0       0       2       0                               0D   3478
     110    9194       0       0       0       0       0       001010001D   3479
     110       0       0       2       0                               0D   3480
     110    9196       0       0       0       0       0       001010001D   3481
     110       0       0       2       0                               0D   3482
     110    9198       0       0       0       0       0       001010001D   3483
     110       0       0       2       0                               0D   3484
     102    9200       0       0       0       0       0       001010001D   3485
     102       0       0       1       0                               0D   3486
     142    9201       0       0       0       0       0       001010001D   3487
     142       0       0       1       0                               0D   3488
     144    9202       0       0   10000       0       0       000000000D   3489
     144       0       0       1       0                PartBody       0D   3490
     108    9203       0       0       0       0       0       001010001D   3491
     108       0       0       2       0                               0D   3492
     110    9205       0       0       0       0       0       001010001D   3493
     110       0       0       2       0                               0D   3494
     110    9207       0       0       0       0       0       001010001D   3495
     110       0       0       2       0                               0D   3496
     110    9209       0       0       0       0       0       001010001D   3497
     110       0       0       2       0                               0D   3498
     110    9211       0       0       0       0       0       001010001D   3499
     110       0       0       2       0                               0D   3500
     102    9213       0       0       0       0       0       001010001D   3501
     102       0       0       1       0                               0D   3502
     142    9214       0       0       0       0       0       001010001D   3503
     142       0       0       1       0                               0D   3504
     144    9215       0       0   10000       0       0       000000000D   3505
     144       0       0       1       0                PartBody       0D   3506
     108    9216       0       0       0       0       0       001010001D   3507
     108       0       0       2       0                               0D   3508
     110    9218       0       0       0       0       0       001010001D   3509
     110       0       0       2       0                               0D   3510
     110    9220       0       0       0       0       0       001010001D   3511
     110       0       0       2       0                               0D   3512
     110    9222       0       0       0       0       0       001010001D   3513
     110       0       0       2       0                               0D   3514
     110    9224       0       0       0       0       0       001010001D   3515
     110       0       0       2       0                               0D   3516
     102    9226       0       0       0       0       0       001010001D   3517
     102       0       0       1       0                               0D   3518
     142    9227       0       0       0       0       0       001010001D   3519
     142       0       0       1       0                               0D   3520
     144    9228       0       0   10000       0       0       000000000D   3521
     144       0       0       1       0                PartBody       0D   3522
     108    9229       0       0       0       0       0       001010001D   3523
     108       0       0       2       0                               0D   3524
     110    9231       0       0       0       0       0       001010001D   3525
     110       0       0       2       0                               0D   3526
     110    9233       0       0       0       0       0       001010001D   3527
     110       0       0       2       0                               0D   3528
     110    9235       0       0       0       0       0       001010001D   3529
     110       0       0       2       0                               0D   3530
     110    9237       0       0       0       0       0       001010001D   3531
     110       0       0       2       0                               0D   3532
     102    9239       0       0       0       0       0       001010001D   3533
     102       0       0       1       0                               0D   3534
     142    9240       0       0       0       0       0       001010001D   3535
     142       0       0       1       0                               0D   3536
     144    9241       0       0   10000       0       0       000000000D   3537
     144       0       0       1       0                PartBody       0D   3538
     108    9242       0       0       0       0       0       001010001D   3539
     108       0       0       2       0                               0D   3540
     110    9244       0       0       0       0       0       001010001D   3541
     110       0       0       2       0                               0D   3542
     110    9246       0       0       0       0       0       001010001D   3543
     110       0       0       2       0                               0D   3544
     110    9248       0       0       0       0       0       001010001D   3545
     110       0       0       2       0                               0D   3546
     110    9250       0       0       0       0       0       001010001D   3547
     110       0       0       2       0                               0D   3548
     102    9252       0       0       0       0       0       001010001D   3549
     102       0       0       1       0                               0D   3550
     142    9253       0       0       0       0       0       001010001D   3551
     142       0       0       1       0                               0D   3552
     144    9254       0       0   10000       0       0       000000000D   3553
     144       0       0       1       0                PartBody       0D   3554
     108    9255       0       0       0       0       0       001010001D   3555
     108       0       0       2       0                               0D   3556
     110    9257       0       0       0       0       0       001010001D   3557
     110       0       0       2       0                               0D   3558
     110    9259       0       0       0       0       0       001010001D   3559
     110       0       0       2       0                               0D   3560
     110    9261       0       0       0       0       0       001010001D   3561
     110       0       0       2       0                               0D   3562
     110    9263       0       0       0       0       0       001010001D   3563
     110       0       0       2       0                               0D   3564
     102    9265       0       0       0       0       0       001010001D   3565
     102       0       0       1       0                               0D   3566
     142    9266       0       0       0       0       0       001010001D   3567
     142       0       0       1       0                               0D   3568
     144    9267       0       0   10000       0       0       000000000D   3569
     144       0       0       1       0                PartBody       0D   3570
     108    9268       0       0       0       0       0       001010001D   3571
     108       0       0       2       0                               0D   3572
     110    9270       0       0       0       0       0       001010001D   3573
     110       0       0       2       0                               0D   3574
     110    9272       0       0       0       0       0       001010001D   3575
     110       0       0       2       0                               0D   3576
     110    9274       0       0       0       0       0       001010001D   3577
     110       0       0       2       0                               0D   3578
     110    9276       0       0       0       0       0       001010001D   3579
     110       0       0       2       0                               0D   3580
     102    9278       0       0       0       0       0       001010001D   3581
     102       0       0       1       0                               0D   3582
     142    9279       0       0       0       0       0       001010001D   3583
     142       0       0       1       0                               0D   3584
     144    9280       0       0   10000       0       0       000000000D   3585
     144       0       0       1       0                PartBody       0D   3586
     108    9281       0       0       0       0       0       001010001D   3587
     108       0       0       2       0                               0D   3588
     110    9283       0       0       0       0       0       001010001D   3589
     110       0       0       2       0                               0D   3590
     110    9285       0       0       0       0       0       001010001D   3591
     110       0       0       2       0                               0D   3592
     110    9287       0       0       0       0       0       001010001D   3593
     110       0       0       2       0                               0D   3594
     110    9289       0       0       0       0       0       001010001D   3595
     110       0       0       2       0                               0D   3596
     102    9291       0       0       0       0       0       001010001D   3597
     102       0       0       1       0                               0D   3598
     142    9292       0       0       0       0       0       001010001D   3599
     142       0       0       1       0                               0D   3600
     144    9293       0       0   10000       0       0       000000000D   3601
     144       0       0       1       0                PartBody       0D   3602
     110    9294       0       0       0       0       0       001010001D   3603
     110       0       0       2       0                               0D   3604
     110    9296       0       0       0       0       0       001010001D   3605
     110       0       0       2       0                               0D   3606
     110    9298       0       0       0       0       0       001010001D   3607
     110       0       0       2       0                               0D   3608
     110    9300       0       0       0       0       0       001010001D   3609
     110       0       0       2       0                               0D   3610
     110    9302       0       0       0       0       0       001010001D   3611
     110       0       0       2       0                               0D   3612
     110    9304       0       0       0       0       0       001010001D   3613
     110       0       0       2       0                               0D   3614
     110    9306       0       0       0       0       0       001010001D   3615
     110       0       0       2       0                               0D   3616
     110    9308       0       0       0       0       0       001010001D   3617
     110       0       0       2       0                               0D   3618
     110    9310       0       0       0       0       0       001010001D   3619
     110       0       0       2       0                               0D   3620
     110    9312       0       0       0       0       0       001010001D   3621
     110       0       0       2       0                               0D   3622
     110    9314       0       0       0       0       0       001010001D   3623
     110       0       0       2       0                               0D   3624
     110    9316       0       0       0       0       0       001010001D   3625
     110       0       0       2       0                               0D   3626
     110    9318       0       0       0       0       0       001010001D   3627
     110       0       0       2       0                               0D   3628
     110    9320       0       0       0       0       0       001010001D   3629
     110       0       0       2       0                               0D   3630
     110    9322       0       0       0       0       0       001010001D   3631
     110       0       0       2       0                               0D   3632
     110    9324       0       0       0       0       0       001010001D   3633
     110       0       0       2       0                               0D   3634
     110    9326       0       0       0       0       0       001010001D   3635
     110       0       0       2       0                               0D   3636
     110    9328       0       0       0       0       0       001010001D   3637
     110       0       0       2       0                               0D   3638
     110    9330       0       0       0       0       0       001010001D   3639
     110       0       0       2       0                               0D   3640
     110    9332       0       0       0       0       0       001010001D   3641
     110       0       0       2       0                               0D   3642
     110    9334       0       0       0       0       0       001010001D   3643
     110       0       0       2       0                               0D   3644
     110    9336       0       0       0       0       0       001010001D   3645
     110       0       0       2       0                               0D   3646
     110    9338       0       0       0       0       0       001010001D   3647
     110       0       0       2       0                               0D   3648
     110    9340       0       0       0       0       0       001010001D   3649
     110       0       0       2       0                               0D   3650
     110    9342       0       0       0       0       0       001010001D   3651
     110       0       0       2       0                               0D   3652
     110    9344       0       0       0       0       0       001010001D   3653
     110       0       0       2       0                               0D   3654
     110    9346       0       0       0       0       0       001010001D   3655
     110       0       0       2       0                               0D   3656
     110    9348       0       0       0       0       0       001010001D   3657
     110       0       0       2       0                               0D   3658
     102    9350       0       0       0       0       0       001010001D   3659
     102       0       0       3       0                               0D   3660
     142    9353       0       0       0       0       0       001010001D   3661
     142       0       0       1       0                               0D   3662
     110    9354       0       0       0       0       0       001010001D   3663
     110       0       0       2       0                               0D   3664
     110    9356       0       0       0       0       0       001010001D   3665
     110       0       0       2       0                               0D   3666
     110    9358       0       0       0       0       0       001010001D   3667
     110       0       0       2       0                               0D   3668
     110    9360       0       0       0       0       0       001010001D   3669
     110       0       0       2       0                               0D   3670
     110    9362       0       0       0       0       0       001010001D   3671
     110       0       0       2       0                               0D   3672
     110    9364       0       0       0       0       0       001010001D   3673
     110       0       0       2       0                               0D   3674
     110    9366       0       0       0       0       0       001010001D   3675
     110       0       0       2       0                               0D   3676
     110    9368       0       0       0       0       0       001010001D   3677
     110       0       0       2       0                               0D   3678
     110    9370       0       0       0       0       0       001010001D   3679
     110       0       0       2       0                               0D   3680
     110    9372       0       0       0       0       0       001010001D   3681
     110       0       0       2       0                               0D   3682
     110    9374       0       0       0       0       0       001010001D   3683
     110       0       0       2       0                               0D   3684
     102    9376       0       0       0       0       0       001010001D   3685
     102       0       0       2       0                               0D   3686
     142    9378       0       0       0       0       0       001010001D   3687
     142       0       0       1       0                               0D   3688
     144    9379       0       0   10000       0       0       000000000D   3689
     144       0       0       1       0                PartBody       0D   3690
     108    9380       0       0       0       0       0       001010001D   3691
     108       0       0       2       0                               0D   3692
     110    9382       0       0       0       0       0       001010001D   3693
     110       0       0       2       0                               0D   3694
     110    9384       0       0       0       0       0       001010001D   3695
     110       0       0       2       0                               0D   3696
     110    9386       0       0       0       0       0       001010001D   3697
     110       0       0       2       0                               0D   3698
     110    9388       0       0       0       0       0       001010001D   3699
     110       0       0       2       0                               0D   3700
     102    9390       0       0       0       0       0       001010001D   3701
     102       0       0       1       0                               0D   3702
     142    9391       0       0       0       0       0       001010001D   3703
     142       0       0       1       0                               0D   3704
     144    9392       0       0   10000       0       0       000000000D   3705
     144       0       0       1       0                PartBody       0D   3706
     108    9393       0       0       0       0       0       001010001D   3707
     108       0       0       2       0                               0D   3708
     110    9395       0       0       0       0       0       001010001D   3709
     110       0       0       2       0                               0D   3710
     110    9397       0       0       0       0       0       001010001D   3711
     110       0       0       2       0                               0D   3712
     110    9399       0       0       0       0       0       001010001D   3713
     110       0       0       2       0                               0D   3714
     110    9401       0       0       0       0       0       001010001D   3715
     110       0       0       2       0                               0D   3716
     102    9403       0       0       0       0       0       001010001D   3717
     102       0       0       1       0                               0D   3718
     142    9404       0       0       0       0       0       001010001D   3719
     142       0       0       1       0                               0D   3720
     144    9405       0       0   10000       0       0       000000000D   3721
     144       0       0       1       0                PartBody       0D   3722
     108    9406       0       0       0       0       0       001010001D   3723
     108       0       0       2       0                               0D   3724
     110    9408       0       0       0       0       0       001010001D   3725
     110       0       0       2       0                               0D   3726
     110    9410       0       0       0       0       0       001010001D   3727
     110       0       0       2       0                               0D   3728
     110    9412       0       0       0       0       0       001010001D   3729
     110       0       0       2       0                               0D   3730
     110    9414       0       0       0       0       0       001010001D   3731
     110       0       0       2       0                               0D   3732
     102    9416       0       0       0       0       0       001010001D   3733
     102       0       0       1       0                               0D   3734
     142    9417       0       0       0       0       0       001010001D   3735
     142       0       0       1       0                               0D   3736
     144    9418       0       0   10000       0       0       000000000D   3737
     144       0       0       1       0                PartBody       0D   3738
     108    9419       0       0       0       0       0       001010001D   3739
     108       0       0       2       0                               0D   3740
     110    9421       0       0       0       0       0       001010001D   3741
     110       0       0       2       0                               0D   3742
     110    9423       0       0       0       0       0       001010001D   3743
     110       0       0       2       0                               0D   3744
     110    9425       0       0       0       0       0       001010001D   3745
     110       0       0       2       0                               0D   3746
     110    9427       0       0       0       0       0       001010001D   3747
     110       0       0       2       0                               0D   3748
     102    9429       0       0       0       0       0       001010001D   3749
     102       0       0       1       0                               0D   3750
     142    9430       0       0       0       0       0       001010001D   3751
     142       0       0       1       0                               0D   3752
     144    9431       0       0   10000       0       0       000000000D   3753
     144       0       0       1       0                PartBody       0D   3754
     108    9432       0       0       0       0       0       001010001D   3755
     108       0       0       2       0                               0D   3756
     110    9434       0       0       0       0       0       001010001D   3757
     110       0       0       2       0                               0D   3758
     110    9436       0       0       0       0       0       001010001D   3759
     110       0       0       2       0                               0D   3760
     110    9438       0       0       0       0       0       001010001D   3761
     110       0       0       2       0                               0D   3762
     110    9440       0       0       0       0       0       001010001D   3763
     110       0       0       2       0                               0D   3764
     102    9442       0       0       0       0       0       001010001D   3765
     102       0       0       1       0                               0D   3766
     142    9443       0       0       0       0       0       001010001D   3767
     142       0       0       1       0                               0D   3768
     144    9444       0       0   10000       0       0       000000000D   3769
     144       0       0       1       0                PartBody       0D   3770
     108    9445       0       0       0       0       0       001010001D   3771
     108       0       0       2       0                               0D   3772
     110    9447       0       0       0       0       0       001010001D   3773
     110       0       0       2       0                               0D   3774
     110    9449       0       0       0       0       0       001010001D   3775
     110       0       0       2       0                               0D   3776
     110    9451       0       0       0       0       0       001010001D   3777
     110       0       0       2       0                               0D   3778
     110    9453       0       0       0       0       0       001010001D   3779
     110       0       0       2       0                               0D   3780
     102    9455       0       0       0       0       0       001010001D   3781
     102       0       0       1       0                               0D   3782
     142    9456       0       0       0       0       0       001010001D   3783
     142       0       0       1       0                               0D   3784
     144    9457       0       0   10000       0       0       000000000D   3785
     144       0       0       1       0                PartBody       0D   3786
     108    9458       0       0       0       0       0       001010001D   3787
     108       0       0       2       0                               0D   3788
     110    9460       0       0       0       0       0       001010001D   3789
     110       0       0       2       0                               0D   3790
     110    9462       0       0       0       0       0       001010001D   3791
     110       0       0       2       0                               0D   3792
     110    9464       0       0       0       0       0       001010001D   3793
     110       0       0       2       0                               0D   3794
     110    9466       0       0       0       0       0       001010001D   3795
     110       0       0       2       0                               0D   3796
     102    9468       0       0       0       0       0       001010001D   3797
     102       0       0       1       0                               0D   3798
     142    9469       0       0       0       0       0       001010001D   3799
     142       0       0       1       0                               0D   3800
     144    9470       0       0   10000       0       0       000000000D   3801
     144       0       0       1       0                PartBody       0D   3802
     108    9471       0       0       0       0       0       001010001D   3803
     108       0       0       2       0                               0D   3804
     110    9473       0       0       0       0       0       001010001D   3805
     110       0       0       2       0                               0D   3806
     110    9475       0       0       0       0       0       001010001D   3807
     110       0       0       2       0                               0D   3808
     110    9477       0       0       0       0       0       001010001D   3809
     110       0       0       2       0                               0D   3810
     110    9479       0       0       0       0       0       001010001D   3811
     110       0       0       2       0                               0D   3812
     102    9481       0       0       0       0       0       001010001D   3813
     102       0       0       1       0                               0D   3814
     142    9482       0       0       0       0       0       001010001D   3815
     142       0       0       1       0                               0D   3816
     144    9483       0       0   10000       0       0       000000000D   3817
     144       0       0       1       0                PartBody       0D   3818
     108    9484       0       0       0       0       0       001010001D   3819
     108       0       0       2       0                               0D   3820
     110    9486       0       0       0       0       0       001010001D   3821
     110       0       0       2       0                               0D   3822
     110    9488       0       0       0       0       0       001010001D   3823
     110       0       0       2       0                               0D   3824
     110    9490       0       0       0       0       0       001010001D   3825
     110       0       0       2       0                               0D   3826
     110    9492       0       0       0       0       0       001010001D   3827
     110       0       0       2       0                               0D   3828
     102    9494       0       0       0       0       0       001010001D   3829
     102       0       0       1       0                               0D   3830
     142    9495       0       0       0       0       0       001010001D   3831
     142       0       0       1       0                               0D   3832
     144    9496       0       0   10000       0       0       000000000D   3833
     144       0       0       1       0                PartBody       0D   3834
     110    9497       0       0       0       0       0       001010001D   3835
     110       0       0       2       0                               0D   3836
     110    9499       0       0       0       0       0       001010001D   3837
     110       0       0       2       0                               0D   3838
     110    9501       0       0       0       0       0       001010001D   3839
     110       0       0       2       0                               0D   3840
     110    9503       0       0       0       0       0       001010001D   3841
     110       0       0       2       0                               0D   3842
     102    9505       0       0       0       0       0       001010001D   3843
     102       0       0       1       0                               0D   3844
     142    9506       0       0       0       0       0       001010001D   3845
     142       0       0       1       0                               0D   3846
     144    9507       0       0   10000       0       0       000000000D   3847
     144       0       0       1       0                PartBody       0D   3848
     108    9508       0       0       0       0       0       001010001D   3849
     108       0       0       2       0                               0D   3850
     110    9510       0       0       0       0       0       001010001D   3851
     110       0       0       2       0                               0D   3852
     110    9512       0       0       0       0       0       001010001D   3853
     110       0       0       2       0                               0D   3854
     110    9514       0       0       0       0       0       001010001D   3855
     110       0       0       2       0                               0D   3856
     110    9516       0       0       0       0       0       001010001D   3857
     110       0       0       2       0                               0D   3858
     102    9518       0       0       0       0       0       001010001D   3859
     102       0       0       1       0                               0D   3860
     142    9519       0       0       0       0       0       001010001D   3861
     142       0       0       1       0                               0D   3862
     144    9520       0       0   10000       0       0       000000000D   3863
     144       0       0       1       0                PartBody       0D   3864
     108    9521       0       0       0       0       0       001010001D   3865
     108       0       0       2       0                               0D   3866
     110    9523       0       0       0       0       0       001010001D   3867
     110       0       0       2       0                               0D   3868
     110    9525       0       0       0       0       0       001010001D   3869
     110       0       0       2       0                               0D   3870
     110    9527       0       0       0       0       0       001010001D   3871
     110       0       0       2       0                               0D   3872
     110    9529       0       0       0       0       0       001010001D   3873
     110       0       0       2       0                               0D   3874
     102    9531       0       0       0       0       0       001010001D   3875
     102       0       0       1       0                               0D   3876
     142    9532       0       0       0       0       0       001010001D   3877
     142       0       0       1       0                               0D   3878
     144    9533       0       0   10000       0       0       000000000D   3879
     144       0       0       1       0                PartBody       0D   3880
     108    9534       0       0       0       0       0       001010001D   3881
     108       0       0       2       0                               0D   3882
     110    9536       0       0       0       0       0       001010001D   3883
     110       0       0       2       0                               0D   3884
     110    9538       0       0       0       0       0       001010001D   3885
     110       0       0       2       0                               0D   3886
     110    9540       0       0       0       0       0       001010001D   3887
     110       0       0       2       0                               0D   3888
     110    9542       0       0       0       0       0       001010001D   3889
     110       0       0       2       0                               0D   3890
     102    9544       0       0       0       0       0       001010001D   3891
     102       0       0       1       0                               0D   3892
     142    9545       0       0       0       0       0       001010001D   3893
     142       0       0       1       0                               0D   3894
     144    9546       0       0   10000       0       0       000000000D   3895
     144       0       0       1       0                PartBody       0D   3896
     108    9547       0       0       0       0       0       001010001D   3897
     108       0       0       2       0                               0D   3898
     110    9549       0       0       0       0       0       001010001D   3899
     110       0       0       2       0                               0D   3900
     110    9551       0       0       0       0       0       001010001D   3901
     110       0       0       2       0                               0D   3902
     110    9553       0       0       0       0       0       001010001D   3903
     110       0       0       2       0                               0D   3904
     110    9555       0       0       0       0       0       001010001D   3905
     110       0       0       2       0                               0D   3906
     102    9557       0       0       0       0       0       001010001D   3907
     102       0       0       1       0                               0D   3908
     142    9558       0       0       0       0       0       001010001D   3909
     142       0       0       1       0                               0D   3910
     144    9559       0       0   10000       0       0       000000000D   3911
     144       0       0       1       0                PartBody       0D   3912
     108    9560       0       0       0       0       0       001010001D   3913
     108       0       0       2       0                               0D   3914
     110    9562       0       0       0       0       0       001010001D   3915
     110       0       0       2       0                               0D   3916
     110    9564       0       0       0       0       0       001010001D   3917
     110       0       0       2       0                               0D   3918
     110    9566       0       0       0       0       0       001010001D   3919
     110       0       0       2       0                               0D   3920
     110    9568       0       0       0       0       0       001010001D   3921
     110       0       0       2       0                               0D   3922
     102    9570       0       0       0       0       0       001010001D   3923
     102       0       0       1       0                               0D   3924
     142    9571       0       0       0       0       0       001010001D   3925
     142       0       0       1       0                               0D   3926
     144    9572       0       0   10000       0       0       000000000D   3927
     144       0       0       1       0                PartBody       0D   3928
     108    9573       0       0       0       0       0       001010001D   3929
     108       0       0       2       0                               0D   3930
     110    9575       0       0       0       0       0       001010001D   3931
     110       0       0       2       0                               0D   3932
     110    9577       0       0       0       0       0       001010001D   3933
     110       0       0       2       0                               0D   3934
     110    9579       0       0       0       0       0       001010001D   3935
     110       0       0       2       0                               0D   3936
     110    9581       0       0       0       0       0       001010001D   3937
     110       0       0       2       0                               0D   3938
     102    9583       0       0       0       0       0       001010001D   3939
     102       0       0       1       0                               0D   3940
     142    9584       0       0       0       0       0       001010001D   3941
     142       0       0       1       0                               0D   3942
     144    9585       0       0   10000       0       0       000000000D   3943
     144       0       0       1       0                PartBody       0D   3944
     108    9586       0       0       0       0       0       001010001D   3945
     108       0       0       2       0                               0D   3946
     110    9588       0       0       0       0       0       001010001D   3947
     110       0       0       2       0                               0D   3948
     110    9590       0       0       0       0       0       001010001D   3949
     110       0       0       2       0                               0D   3950
     110    9592       0       0       0       0       0       001010001D   3951
     110       0       0       2       0                               0D   3952
     110    9594       0       0       0       0       0       001010001D   3953
     110       0       0       2       0                               0D   3954
     102    9596       0       0       0       0       0       001010001D   3955
     102       0       0       1       0                               0D   3956
     142    9597       0       0       0       0       0       001010001D   3957
     142       0       0       1       0                               0D   3958
     144    9598       0       0   10000       0       0       000000000D   3959
     144       0       0       1       0                PartBody       0D   3960
     108    9599       0       0       0       0       0       001010001D   3961
     108       0       0       2       0                               0D   3962
     110    9601       0       0       0       0       0       001010001D   3963
     110       0       0       2       0                               0D   3964
     110    9603       0       0       0       0       0       001010001D   3965
     110       0       0       2       0                               0D   3966
     110    9605       0       0       0       0       0       001010001D   3967
     110       0       0       2       0                               0D   3968
     110    9607       0       0       0       0       0       001010001D   3969
     110       0       0       2       0                               0D   3970
     102    9609       0       0       0       0       0       001010001D   3971
     102       0       0       1       0                               0D   3972
     142    9610       0       0       0       0       0       001010001D   3973
     142       0       0       1       0                               0D   3974
     144    9611       0       0   10000       0       0       000000000D   3975
     144       0       0       1       0                PartBody       0D   3976
     108    9612       0       0       0       0       0       001010001D   3977
     108       0       0       2       0                               0D   3978
     110    9614       0       0       0       0       0       001010001D   3979
     110       0       0       2       0                               0D   3980
     110    9616       0       0       0       0       0       001010001D   3981
     110       0       0       2       0                               0D   3982
     110    9618       0       0       0       0       0       001010001D   3983
     110       0       0       2       0                               0D   3984
     110    9620       0       0       0       0       0       001010001D   3985
     110       0       0       2       0                               0D   3986
     102    9622       0       0       0       0       0       001010001D   3987
     102       0       0       1       0                               0D   3988
     142    9623       0       0       0       0       0       001010001D   3989
     142       0       0       1       0                               0D   3990
     144    9624       0       0   10000       0       0       000000000D   3991
     144       0       0       1       0                PartBody       0D   3992
     108    9625       0       0       0       0       0       001010001D   3993
     108       0       0       2       0                               0D   3994
     110    9627       0       0       0       0       0       001010001D   3995
     110       0       0       2       0                               0D   3996
     110    9629       0       0       0       0       0       001010001D   3997
     110       0       0       2       0                               0D   3998
     110    9631       0       0       0       0       0       001010001D   3999
     110       0       0       2       0                               0D   4000
     110    9633       0       0       0       0       0       001010001D   4001
     110       0       0       2       0                               0D   4002
     102    9635       0       0       0       0       0       001010001D   4003
     102       0       0       1       0                               0D   4004
     142    9636       0       0       0       0       0       001010001D   4005
     142       0       0       1       0                               0D   4006
     144    9637       0       0   10000       0       0       000000000D   4007
     144       0       0       1       0                PartBody       0D   4008
     108    9638       0       0       0       0       0       001010001D   4009
     108       0       0       2       0                               0D   4010
     110    9640       0       0       0       0       0       001010001D   4011
     110       0       0       2       0                               0D   4012
     110    9642       0       0       0       0       0       001010001D   4013
     110       0       0       2       0                               0D   4014
     110    9644       0       0       0       0       0       001010001D   4015
     110       0       0       2       0                               0D   4016
     110    9646       0       0       0       0       0       001010001D   4017
     110       0       0       2       0                               0D   4018
     102    9648       0       0       0       0       0       001010001D   4019
     102       0       0       1       0                               0D   4020
     142    9649       0       0       0       0       0       001010001D   4021
     142       0       0       1       0                               0D   4022
     144    9650       0       0   10000       0       0       000000000D   4023
     144       0       0       1       0                PartBody       0D   4024
     108    9651       0       0       0       0       0       001010001D   4025
     108       0       0       2       0                               0D   4026
     110    9653       0       0       0       0       0       001010001D   4027
     110       0       0       2       0                               0D   4028
     110    9655       0       0       0       0       0       001010001D   4029
     110       0       0       2       0                               0D   4030
     110    9657       0       0       0       0       0       001010001D   4031
     110       0       0       2       0                               0D   4032
     110    9659       0       0       0       0       0       001010001D   4033
     110       0       0       2       0                               0D   4034
     102    9661       0       0       0       0       0       001010001D   4035
     102       0       0       1       0                               0D   4036
     142    9662       0       0       0       0       0       001010001D   4037
     142       0       0       1       0                               0D   4038
     144    9663       0       0   10000       0       0       000000000D   4039
     144       0       0       1       0                PartBody       0D   4040
     108    9664       0       0       0       0       0       001010001D   4041
     108       0       0       2       0                               0D   4042
     110    9666       0       0       0       0       0       001010001D   4043
     110       0       0       2       0                               0D   4044
     110    9668       0       0       0       0       0       001010001D   4045
     110       0       0       2       0                               0D   4046
     110    9670       0       0       0       0       0       001010001D   4047
     110       0       0       1       0                               0D   4048
     110    9671       0       0       0       0       0       001010001D   4049
     110       0       0       2       0                               0D   4050
     102    9673       0       0       0       0       0       001010001D   4051
     102       0       0       1       0                               0D   4052
     142    9674       0       0       0       0       0       001010001D   4053
     142       0       0       1       0                               0D   4054
     144    9675       0       0   10000       0       0       000000000D   4055
     144       0       0       1       0                PartBody       0D   4056
     108    9676       0       0       0       0       0       001010001D   4057
     108       0       0       2       0                               0D   4058
     110    9678       0       0       0       0       0       001010001D   4059
     110       0       0       2       0                               0D   4060
     110    9680       0       0       0       0       0       001010001D   4061
     110       0       0       2       0                               0D   4062
     110    9682       0       0       0       0       0       001010001D   4063
     110       0       0       1       0                               0D   4064
     110    9683       0       0       0       0       0       001010001D   4065
     110       0       0       2       0                               0D   4066
     102    9685       0       0       0       0       0       001010001D   4067
     102       0       0       1       0                               0D   4068
     142    9686       0       0       0       0       0       001010001D   4069
     142       0       0       1       0                               0D   4070
     144    9687       0       0   10000       0       0       000000000D   4071
     144       0       0       1       0                PartBody       0D   4072
     108    9688       0       0       0       0       0       001010001D   4073
     108       0       0       2       0                               0D   4074
     110    9690       0       0       0       0       0       001010001D   4075
     110       0       0       2       0                               0D   4076
     110    9692       0       0       0       0       0       001010001D   4077
     110       0       0       2       0                               0D   4078
     110    9694       0       0       0       0       0       001010001D   4079
     110       0       0       2       0                               0D   4080
     110    9696       0       0       0       0       0       001010001D   4081
     110       0       0       2       0                               0D   4082
     102    9698       0       0       0       0       0       001010001D   4083
     102       0       0       1       0                               0D   4084
     142    9699       0       0       0       0       0       001010001D   4085
     142       0       0       1       0                               0D   4086
     144    9700       0       0   10000       0       0       000000000D   4087
     144       0       0       1       0                PartBody       0D   4088
     108    9701       0       0       0       0       0       001010001D   4089
     108       0       0       2       0                               0D   4090
     110    9703       0       0       0       0       0       001010001D   4091
     110       0       0       2       0                               0D   4092
     110    9705       0       0       0       0       0       001010001D   4093
     110       0       0       1       0                               0D   4094
     110    9706       0       0       0       0       0       001010001D   4095
     110       0       0       1       0                               0D   4096
     110    9707       0       0       0       0       0       001010001D   4097
     110       0       0       2       0                               0D   4098
     102    9709       0       0       0       0       0       001010001D   4099
     102       0       0       1       0                               0D   4100
     142    9710       0       0       0       0       0       001010001D   4101
     142       0       0       1       0                               0D   4102
     144    9711       0       0   10000       0       0       000000000D   4103
     144       0       0       1       0                PartBody       0D   4104
     108    9712       0       0       0       0       0       001010001D   4105
     108       0       0       2       0                               0D   4106
     110    9714       0       0       0       0       0       001010001D   4107
     110       0       0       2       0                               0D   4108
     110    9716       0       0       0       0       0       001010001D   4109
     110       0       0       2       0                               0D   4110
     110    9718       0       0       0       0       0       001010001D   4111
     110       0       0       2       0                               0D   4112
     110    9720       0       0       0       0       0       001010001D   4113
     110       0       0       2       0                               0D   4114
     102    9722       0       0       0       0       0       001010001D   4115
     102       0       0       1       0                               0D   4116
     142    9723       0       0       0       0       0       001010001D   4117
     142       0       0       1       0                               0D   4118
     144    9724       0       0   10000       0       0       000000000D   4119
     144       0       0       1       0                PartBody       0D   4120
     108    9725       0       0       0       0       0       001010001D   4121
     108       0       0       2       0                               0D   4122
     110    9727       0       0       0       0       0       001010001D   4123
     110       0       0       1       0                               0D   4124
     110    9728       0       0       0       0       0       001010001D   4125
     110       0       0       1       0                               0D   4126
     110    9729       0       0       0       0       0       001010001D   4127
     110       0       0       2       0                               0D   4128
     110    9731       0       0       0       0       0       001010001D   4129
     110       0       0       2       0                               0D   4130
     102    9733       0       0       0       0       0       001010001D   4131
     102       0       0       1       0                               0D   4132
     142    9734       0       0       0       0       0       001010001D   4133
     142       0       0       1       0                               0D   4134
     144    9735       0       0   10000       0       0       000000000D   4135
     144       0       0       1       0                PartBody       0D   4136
     108    9736       0       0       0       0       0       001010001D   4137
     108       0       0       2       0                               0D   4138
     110    9738       0       0       0       0       0       001010001D   4139
     110       0       0       2       0                               0D   4140
     110    9740       0       0       0       0       0       001010001D   4141
     110       0       0       1       0                               0D   4142
     110    9741       0       0       0       0       0       001010001D   4143
     110       0       0       1       0                               0D   4144
     110    9742       0       0       0       0       0       001010001D   4145
     110       0       0       2       0                               0D   4146
     102    9744       0       0       0       0       0       001010001D   4147
     102       0       0       1       0                               0D   4148
     142    9745       0       0       0       0       0       001010001D   4149
     142       0       0       1       0                               0D   4150
     144    9746       0       0   10000       0       0       000000000D   4151
     144       0       0       1       0                PartBody       0D   4152
     108    9747       0       0       0       0       0       001010001D   4153
     108       0       0       2       0                               0D   4154
     110    9749       0       0       0       0       0       001010001D   4155
     110       0       0       2       0                               0D   4156
     110    9751       0       0       0       0       0       001010001D   4157
     110       0       0       2       0                               0D   4158
     110    9753       0       0       0       0       0       001010001D   4159
     110       0       0       2       0                               0D   4160
     110    9755       0       0       0       0       0       001010001D   4161
     110       0       0       2       0                               0D   4162
     102    9757       0       0       0       0       0       001010001D   4163
     102       0       0       1       0                               0D   4164
     142    9758       0       0       0       0       0       001010001D   4165
     142       0       0       1       0                               0D   4166
     144    9759       0       0   10000       0       0       000000000D   4167
     144       0       0       1       0                PartBody       0D   4168
     108    9760       0       0       0       0       0       001010001D   4169
     108       0       0       2       0                               0D   4170
     110    9762       0       0       0       0       0       001010001D   4171
     110       0       0       2       0                               0D   4172
     110    9764       0       0       0       0       0       001010001D   4173
     110       0       0       2       0                               0D   4174
     110    9766       0       0       0       0       0       001010001D   4175
     110       0       0       2       0                               0D   4176
     110    9768       0       0       0       0       0       001010001D   4177
     110       0       0       2       0                               0D   4178
     102    9770       0       0       0       0       0       001010001D   4179
     102       0       0       1       0                               0D   4180
     142    9771       0       0       0       0       0       001010001D   4181
     142       0       0       1       0                               0D   4182
     144    9772       0       0   10000       0       0       000000000D   4183
     144       0       0       1       0                PartBody       0D   4184
     108    9773       0       0       0       0       0       001010001D   4185
     108       0       0       2       0                               0D   4186
     110    9775       0       0       0       0       0       001010001D   4187
     110       0       0       2       0                               0D   4188
     110    9777       0       0       0       0       0       001010001D   4189
     110       0       0       2       0                               0D   4190
     110    9779       0       0       0       0       0       001010001D   4191
     110       0       0       2       0                               0D   4192
     110    9781       0       0       0       0       0       001010001D   4193
     110       0       0       2       0                               0D   4194
     102    9783       0       0       0       0       0       001010001D   4195
     102       0       0       1       0                               0D   4196
     142    9784       0       0       0       0       0       001010001D   4197
     142       0       0       1       0                               0D   4198
     144    9785       0       0   10000       0       0       000000000D   4199
     144       0       0       1       0                PartBody       0D   4200
     108    9786       0       0       0       0       0       001010001D   4201
     108       0       0       2       0                               0D   4202
     110    9788       0       0       0       0       0       001010001D   4203
     110       0       0       2       0                               0D   4204
     110    9790       0       0       0       0       0       001010001D   4205
     110       0       0       2       0                               0D   4206
     110    9792       0       0       0       0       0       001010001D   4207
     110       0       0       2       0                               0D   4208
     110    9794       0       0       0       0       0       001010001D   4209
     110       0       0       2       0                               0D   4210
     102    9796       0       0       0       0       0       001010001D   4211
     102       0       0       1       0                               0D   4212
     142    9797       0       0       0       0       0       001010001D   4213
     142       0       0       1       0                               0D   4214
     144    9798       0       0   10000       0       0       000000000D   4215
     144       0       0       1       0                PartBody       0D   4216
     108    9799       0       0       0       0       0       001010001D   4217
     108       0       0       2       0                               0D   4218
     110    9801       0       0       0       0       0       001010001D   4219
     110       0       0       2       0                               0D   4220
     110    9803       0       0       0       0       0       001010001D   4221
     110       0       0       2       0                               0D   4222
     110    9805       0       0       0       0       0       001010001D   4223
     110       0       0       2       0                               0D   4224
     110    9807       0       0       0       0       0       001010001D   4225
     110       0       0       2       0                               0D   4226
     102    9809       0       0       0       0       0       001010001D   4227
     102       0       0       1       0                               0D   4228
     142    9810       0       0       0       0       0       001010001D   4229
     142       0       0       1       0                               0D   4230
     144    9811       0       0   10000       0       0       000000000D   4231
     144       0       0       1       0                PartBody       0D   4232
     110    9812       0       0       0       0       0       001010001D   4233
     110       0       0       2       0                               0D   4234
     110    9814       0       0       0       0       0       001010001D   4235
     110       0       0       2       0                               0D   4236
     110    9816       0       0       0       0       0       001010001D   4237
     110       0       0       2       0                               0D   4238
     110    9818       0       0       0       0       0       001010001D   4239
     110       0       0       2       0                               0D   4240
     102    9820       0       0       0       0       0       001010001D   4241
     102       0       0       1       0                               0D   4242
     142    9821       0       0       0       0       0       001010001D   4243
     142       0       0       1       0                               0D   4244
     144    9822       0       0   10000       0       0       000000000D   4245
     144       0       0       1       0                PartBody       0D   4246
     108    9823       0       0       0       0       0       001010001D   4247
     108       0       0       2       0                               0D   4248
     110    9825       0       0       0       0       0       001010001D   4249
     110       0       0       1       0                               0D   4250
     110    9826       0       0       0       0       0       001010001D   4251
     110       0       0       1       0                               0D   4252
     110    9827       0       0       0       0       0       001010001D   4253
     110       0       0       2       0                               0D   4254
     110    9829       0       0       0       0       0       001010001D   4255
     110       0       0       2       0                               0D   4256
     102    9831       0       0       0       0       0       001010001D   4257
     102       0       0       1       0                               0D   4258
     142    9832       0       0       0       0       0       001010001D   4259
     142       0       0       1       0                               0D   4260
     144    9833       0       0   10000       0       0       000000000D   4261
     144       0       0       1       0                PartBody       0D   4262
108,0.0,1.0,0.0,-5.3,0,0.0,-5.3,0.0,1.0,0,0;                           1P      1
124,-1.0,0.0,0.0,0.0,0.0,0.0,1.0,-5.3,0.0,1.0,0.0,0.0,0,0;             3P      2
100,0.0,0.0,0.0,5.0,0.0,-5.0,0.0,0,0;                                  5P      3
124,1.0,0.0,0.0,0.0,0.0,0.0,1.0,-5.3,0.0,-1.0,0.0,0.0,0,0;             7P      4
100,0.0,0.0,0.0,5.0,0.0,-5.0,0.0,0,0;                                  9P      5
102,2,5,9,0,0;                                                        11P      6
142,0,1,0,11,2,0,0;                                                   13P      7
124,1.0,0.0,0.0,0.0,0.0,0.0,-1.0,-5.3,0.0,1.0,0.0,0.0,0,0;            15P      8
100,0.0,0.0,0.0,2.6,0.0,-2.6,0.0,0,0;                                 17P      9
124,-1.0,0.0,0.0,0.0,0.0,0.0,-1.0,-5.3,0.0,-1.0,0.0,0.0,0,0;          19P     10
100,0.0,0.0,0.0,2.6,0.0,-2.6,0.0,0,0;                                 21P     11
102,2,17,21,0,0;                                                      23P     12
142,0,1,0,23,2,0,0;                                                   25P     13
144,1,1,1,13,25,0,0;                                                  27P     14
110,0.0,-0.8,0.0,0.0,0.2,0.0,0,0;                                     29P     15
110,-5.0,-5.3,0.0,-5.0,3.7,0.0,0,0;                                   31P     16
120,29,31,0.0,6.283185307,0,0;                                        33P     17
126,3,3,0,0,1,0,0.0,0.0,0.0,0.0,1.232689918,1.232689918,              35P     18
1.232689918,1.232689918,1.0,1.0,1.0,1.0,-5.0,1.889253558,             35P     19
2.667650856E-007,-4.999999991,2.069156895,0.1746778639,               35P     20
-4.990803389,2.248989229,0.3449513419,-4.974050244,2.428774961,       35P     21
0.508747649,0.0,1.232689918,0.0,0.0,0.0,0,0;                          35P     22
126,3,3,0,0,1,0,0.0,0.0,0.0,0.0,2.060442661,2.060442661,              37P     23
2.060442661,2.060442661,1.0,1.0,1.0,1.0,-4.974050244,                 37P     24
2.428774961,0.508747649,-4.946047342,2.729287026,0.7825333707,        37P     25
-4.89704113,3.029750525,1.03752098,-4.836184186,3.327264114,          37P     26
1.269378794,0.0,2.060442661,0.0,0.0,0.0,0,0;                          37P     27
126,3,3,0,0,1,0,0.0,0.0,0.0,0.0,0.0550330392,0.0550330392,            39P     28
0.0550330392,0.0550330392,1.0,1.0,1.0,1.0,-4.83621977,                39P     29
3.327377055,1.269243213,-4.834782783,3.334404398,1.274718592,         39P     30
-4.833338767,3.341431651,1.28018288,-4.831887822,3.348458823,         39P     31
1.285636059,0.0,0.0550330392,0.0,0.0,0.0,0,0;                         39P     32
126,3,3,0,0,1,0,0.0,0.0,0.0,0.0,0.5190162326,0.5190162326,            41P     33
0.5190162326,0.5190162326,1.0,1.0,1.0,1.0,-4.831887822,               41P     34
3.348458823,1.285636059,-4.848637958,3.343388883,1.222682955,         41P     35
-4.864637038,3.338814609,1.157580126,-4.879569581,3.334443794,        41P     36
1.090779861,0.0,0.5190162326,0.0,0.0,0.0,0,0;                         41P     37
126,3,3,0,0,1,0,0.3147515737,0.3147515737,0.3147515737,               43P     38
0.3147515737,1.122096603,1.122096603,1.122096603,1.122096603,         43P     39
1.0,1.0,1.0,1.0,-4.879577855,3.334979229,1.090742846,                 43P     40
-4.917717342,3.32377203,0.9201209657,-4.948497264,3.313143804,        43P     41
0.7400236679,-4.969280436,3.303070892,0.5534003507,0.3147515737,      43P     42
1.122096603,0.0,0.0,0.0,0,0;                                          43P     43
126,3,3,0,0,1,0,1.122096603,1.122096603,1.122096603,1.122096603,      45P     44
1.278392694,1.278392694,1.278392694,1.278392694,1.0,1.0,1.0,1.0,      45P     45
-4.969280436,3.303070892,0.5534003507,-4.973303906,3.301120849,       45P     46
0.5172714419,-4.976956154,3.299191518,0.4808936938,-4.980222498,      45P     47
3.297282354,0.4442790402,1.122096603,1.278392694,0.0,0.0,0.0,0,       45P     48
0;                                                                    45P     49
126,3,3,0,0,1,0,0.0,0.0,0.0,0.0,0.7744859648,0.7744859648,            47P     50
0.7744859648,0.7744859648,1.0,1.0,1.0,1.0,-4.980222498,               47P     51
3.297282354,0.4442790402,-4.993980679,3.289240758,0.2900543389,       47P     52
-5.0,3.223075468,0.1353026168,-5.0,3.12403649,0.0,0.0,                47P     53
0.7744859648,0.0,0.0,0.0,0,0;                                         47P     54
110,-5.0,3.12403649,0.0,-5.0,3.7,0.0,0,0;                             49P     55
124,-1.0,0.0,0.0,0.0,0.0,0.0,1.0,3.7,0.0,1.0,0.0,0.0,0,0;             51P     56
100,0.0,0.0,0.0,5.0,0.0,-5.0,0.0,0,0;                                 53P     57
110,5.0,3.7,0.0,5.0,-2.612946143,0.0,0,0;                             55P     58
126,3,3,0,0,1,0,0.0,0.0,0.0,0.0,0.2870428482,0.2870428482,            57P     59
0.2870428482,0.2870428482,1.0,1.0,1.0,1.0,5.0,-2.612946143,           57P     60
9.743378326E-011,5.0,-2.662266184,0.02715223875,4.999778885,          57P     61
-2.711756243,0.05394649867,4.999353798,-2.761410326,                  57P     62
0.08038410746,0.0,0.2870428482,0.0,0.0,0.0,0,0;                       57P     63
126,3,3,0,0,1,0,0.0,0.0,0.0,0.0,1.155423171,1.155423171,              59P     64
1.155423171,1.155423171,1.0,1.0,1.0,1.0,4.999353798,                  59P     65
-2.761410326,0.08038410746,4.997364278,-2.993804286,0.20411896,       59P     66
4.993022641,-3.264014764,0.2641361631,4.992667605,-3.533440738,       59P     67
0.270684669,0.0,1.155423171,0.0,0.0,0.0,0,0;                          59P     68
126,3,3,0,0,1,0,0.0,0.0,0.0,0.0,0.02096283356,0.02096283356,          61P     69
0.02096283356,0.02096283356,1.0,1.0,1.0,1.0,4.992667605,              61P     70
-3.533440738,0.270684669,4.992661163,-3.538328932,0.2708034785,       61P     71
4.992655684,-3.543217404,0.2709044578,4.99265117,-3.548105988,        61P     72
0.2709876361,0.0,0.02096283356,0.0,0.0,0.0,0,0;                       61P     73
126,3,3,0,0,1,0,0.0,0.0,0.0,0.0,1.828611479,1.828611479,              63P     74
1.828611479,1.828611479,1.0,1.0,1.0,1.0,4.99265117,-3.548105988,      63P     75
0.2709876361,4.992211244,-4.024465045,0.2790927927,4.991752977,       63P     76
-4.500824456,0.2871711438,4.991276748,-4.977184218,0.2952226705,      63P     77
0.0,1.828611479,0.0,0.0,0.0,0,0;                                      63P     78
126,2,2,0,0,1,0,0.0,0.0,0.0,0.05173033784,0.05173033784,              65P     79
0.05173033784,1.0,1.0,1.0,4.991276748,-4.977184218,0.2952226705,      65P     80
4.99125654,-4.997398122,0.2955643299,4.991236288,-5.017612027,        65P     81
0.2959059249,0.0,0.05173033784,0.0,0.0,0.0,0,0;                       65P     82
126,3,3,0,0,1,0,0.0,0.0,0.0,0.0,1.134002084,1.134002084,              67P     83
1.134002084,1.134002084,1.0,1.0,1.0,1.0,4.991236288,                  67P     84
-5.017612027,0.2959059249,4.996739444,-4.798998927,0.2030806327,      67P     85
5.0,-4.582616329,0.1044776228,5.0,-4.368984404,0.0,0.0,               67P     86
1.134002084,0.0,0.0,0.0,0,0;                                          67P     87
110,5.0,-4.368984404,0.0,5.0,-5.3,0.0,0,0;                            69P     88
124,1.0,0.0,0.0,0.0,0.0,0.0,-1.0,-5.3,0.0,1.0,0.0,0.0,0,0;            71P     89
100,0.0,0.0,0.0,5.0,0.0,-5.0,0.0,0,0;                                 73P     90
110,-5.0,-5.3,0.0,-5.0,1.889253558,0.0,0,0;                           75P     91
102,19,35,37,39,41,43,45,47,49,53,55,57,59,61,63,65,67,69,73,75,      77P     92
0,0;                                                                  77P     93
142,0,33,0,77,2,0,0;                                                  79P     94
126,3,3,0,0,1,0,0.0,0.0,0.0,0.0,1.012316811,1.012316811,              81P     95
1.012316811,1.012316811,1.0,1.0,1.0,1.0,2.874868184,3.297282354,      81P     96
4.09085968,2.709282544,3.286771327,4.207225659,2.537097113,           81P     97
3.178008833,4.311492581,2.396035271,3.023701098,4.388509426,0.0,      81P     98
1.012316811,0.0,0.0,0.0,0,0;                                          81P     99
126,8,5,0,0,1,0,0.0,0.0,0.0,0.0,0.0,0.0,6.551591344,6.551591344,      83P    100
6.551591344,13.08424237,13.08424237,13.08424237,13.08424237,          83P    101
13.08424237,13.08424237,1.0,1.0,1.0,1.0,1.0,1.0,1.0,1.0,1.0,          83P    102
2.396035271,3.023701098,4.388509426,1.920193314,2.503176948,          83P    103
4.648309281,1.378875038,1.981736701,4.860138783,0.7826717538,         83P    104
1.451337562,4.992230373,-0.3936405975,0.3708565116,5.061836225,       83P    105
-1.432307783,-0.8055936152,4.832412504,-1.886015731,                  83P    106
-1.430878596,4.660661288,-2.259552267,-2.083380276,4.47490599,        83P    107
-2.569291578,-2.761410326,4.289375338,0.0,13.08424237,0.0,0.0,        83P    108
0.0,0,0;                                                              83P    109
126,3,3,0,0,1,0,0.0,0.0,0.0,0.0,1.176386004,1.176386004,              85P    110
1.176386004,1.176386004,1.0,1.0,1.0,1.0,-2.569291578,                 85P    111
-2.761410326,4.289375338,-2.677380454,-2.998020608,4.224631216,       85P    112
-2.727092028,-3.27376993,4.190822226,-2.731007762,-3.548105988,       85P    113
4.188268927,0.0,1.176386004,0.0,0.0,0.0,0,0;                          85P    114
126,3,3,0,0,1,0,0.0,0.0,0.0,0.0,1.880341817,1.880341817,              87P    115
1.880341817,1.880341817,1.0,1.0,1.0,1.0,-2.731007762,                 87P    116
-3.548105988,4.188268927,-2.737999419,-4.037940961,4.183709939,       87P    117
-2.744956833,-4.527776309,4.179148328,-2.751880192,-5.017612027,      87P    118
4.174584459,0.0,1.880341817,0.0,0.0,0.0,0,0;                          87P    119
126,3,3,0,0,1,0,0.0,0.0,0.0,0.0,3.793869102,3.793869102,              89P    120
3.793869102,3.793869102,1.0,1.0,1.0,1.0,-2.751880192,                 89P    121
-5.017612027,4.174584459,-2.492139534,-4.286229347,4.345805135,       89P    122
-2.161646245,-3.581140023,4.530234916,-1.74710599,-2.914743448,       89P    123
4.684828776,0.0,3.793869102,0.0,0.0,0.0,0,0;                          89P    124
126,5,5,0,0,1,0,0.0,0.0,0.0,0.0,0.0,0.0,2.319431952,2.319431952,      91P    125
2.319431952,2.319431952,2.319431952,2.319431952,1.0,1.0,1.0,1.0,      91P    126
1.0,1.0,-1.747135792,-2.914758257,4.684817662,-1.577510324,           91P    127
-2.638645585,4.748077056,-1.398369498,-2.379919823,4.806332737,       91P    128
-1.201656338,-2.103199494,4.860010389,-0.9999144496,                  91P    129
-1.849040947,4.903717826,-0.7874773424,-1.597070974,4.937598549,      91P    130
0.0,2.319431952,0.0,0.0,0.0,0,0;                                      91P    131
126,3,3,0,0,1,0,0.0,0.0,0.0,0.0,1.761555141,1.761555141,              93P    132
1.761555141,1.761555141,1.0,1.0,1.0,1.0,-0.7874866411,                93P    133
-1.597006556,4.937597066,-0.5477469548,-1.309626129,4.975832629,      93P    134
-0.2949818708,-1.029689959,4.998100636,-0.03417333059,                93P    135
-0.7542759515,4.999883217,0.0,1.761555141,0.0,0.0,0.0,0,0;            93P    136
126,3,3,0,0,1,0,0.0,0.0,0.0,0.0,1.86740439,1.86740439,                95P    137
1.86740439,1.86740439,1.0,1.0,1.0,1.0,-0.03429672197,                 95P    138
-0.7542101197,4.999882372,0.2722298074,-0.4282992044,                 95P    139
5.001984993,0.5865154682,-0.1132261249,4.975527058,0.8974057044,      95P    140
0.1941092838,4.918807071,0.0,1.86740439,0.0,0.0,0.0,0,0;              95P    141
126,5,5,0,0,1,0,0.0,0.0,0.0,0.0,0.0,0.0,7.119042983,7.119042983,      97P    142
7.119042983,7.119042983,7.119042983,7.119042983,1.0,1.0,1.0,1.0,      97P    143
1.0,1.0,0.8973254953,0.1941118273,4.918821704,1.542838853,            97P    144
0.8391785664,4.80106269,2.163750652,1.45959517,4.579813909,           97P    145
2.719582218,2.080694999,4.257838054,3.164606082,2.711057997,          97P    146
3.902841095,3.517722028,3.327815388,3.553256497,0.0,7.119042983,      97P    147
0.0,0.0,0.0,0,0;                                                      97P    148
126,3,3,0,0,1,0,0.0,0.0,0.0,0.0,0.05359386516,0.05359386516,          99P    149
0.05359386516,0.05359386516,1.0,1.0,1.0,1.0,3.517622367,              99P    150
3.327928373,3.553355159,3.521539808,3.334771938,3.549477111,          99P    151
3.525444808,3.341615419,3.545598554,3.529337398,3.348458823,          99P    152
3.541719573,0.0,0.05359386516,0.0,0.0,0.0,0,0;                        99P    153
126,3,3,0,0,1,0,0.0,0.0,0.0,0.0,0.5190015965,0.5190015965,           101P    154
0.5190015965,0.5190015965,1.0,1.0,1.0,1.0,3.529337398,               101P    155
3.348458823,3.541719573,3.48319478,3.343389026,3.587700872,          101P    156
3.434815043,3.338814868,3.634106575,3.384432123,3.334444164,         101P    157
3.680437366,0.0,0.5190015965,0.0,0.0,0.0,0,0;                        101P    158
126,3,3,0,0,1,0,0.3147426597,0.3147426597,0.3147426597,              103P    159
0.3147426597,1.278392694,1.278392694,1.278392694,1.278392694,        103P    160
1.0,1.0,1.0,1.0,3.384404204,3.3349796,3.680463039,3.230795907,       103P    161
3.32160263,3.821714986,3.060303305,3.309053384,3.960544399,          103P    162
2.874868184,3.297282354,4.09085968,0.3147426597,1.278392694,0.0,     103P    163
0.0,0.0,0,0;                                                         103P    164
102,12,81,83,85,87,89,91,93,95,97,99,101,103,0,0;                    105P    165
142,0,33,0,105,2,0,0;                                                107P    166
144,33,1,1,79,107,0,0;                                               109P    167
110,0.0,-0.8,0.0,0.0,0.2,0.0,0,0;                                    111P    168
110,5.0,-5.3,1.570804768E-011,5.0,3.7,1.570804768E-011,0,0;          113P    169
120,111,113,0.0,6.283185307,0,0;                                     115P    170
126,3,3,0,0,1,0,0.0,0.0,0.0,0.0,0.2379609734,0.2379609734,           117P    171
0.2379609734,0.2379609734,1.0,1.0,1.0,1.0,-5.0,3.124036326,0.0,      117P    172
-5.0,3.093606568,-0.04157175093,-4.999479143,3.059973556,            117P    173
-0.08145892441,-4.998578283,3.023701098,-0.1192272993,0.0,           117P    174
0.2379609734,0.0,0.0,0.0,0,0;                                        117P    175
126,3,3,0,0,1,0,0.0,0.0,0.0,0.0,0.3495745096,0.3495745096,           119P    176
0.3495745096,0.3495745096,1.0,1.0,1.0,1.0,-4.998578283,              119P    177
3.023701098,-0.1192272993,-4.99742864,2.977411587,-0.1674258414,     119P    178
-4.995573852,2.931113302,-0.2159353764,-4.99298765,2.884794518,      119P    179
-0.2647155631,0.0,0.3495745096,0.0,0.0,0.0,0,0;                      119P    180
126,3,3,0,0,1,0,0.5068587762,0.5068587762,0.5068587762,              121P    181
0.5068587762,1.446676721,1.446676721,1.446676721,1.446676721,        121P    182
1.0,1.0,1.0,1.0,-4.992977019,2.885010743,-0.264915998,               121P    183
-4.984482112,2.729584406,-0.4250228806,-4.968190284,2.57875554,      121P    184
-0.5865713036,-4.943585278,2.430458465,-0.7489756974,                121P    185
0.5068587762,1.446676721,0.0,0.0,0.0,0,0;                            121P    186
126,4,4,0,0,1,0,0.0,0.0,0.0,0.0,0.0,4.154110882,4.154110882,         123P    187
4.154110882,4.154110882,4.154110882,1.0,1.0,1.0,1.0,1.0,             123P    188
-4.943575206,2.430514628,-0.7490421763,-4.876020027,2.015520361,     123P    189
-1.194897057,-4.752324421,1.596600725,-1.648893643,-4.568285489,     123P    190
1.17081079,-2.082066371,-4.344607113,0.7323735787,-2.474750297,      123P    191
0.0,4.154110882,0.0,0.0,0.0,0,0;                                     123P    192
126,4,4,0,0,1,0,0.0,0.0,0.0,0.0,0.0,5.676976722,5.676976722,         125P    193
5.676976722,5.676976722,5.676976722,1.0,1.0,1.0,1.0,1.0,             125P    194
-4.344607113,0.7323735787,-2.474750297,-4.038929925,                 125P    195
0.1332085796,-3.0113892,-3.656594545,-0.4894676591,-3.473821202,     125P    196
-3.252691404,-1.160248813,-3.824986256,-2.877460172,                 125P    197
-1.865454698,-4.089036923,0.0,5.676976722,0.0,0.0,0.0,0,0;           125P    198
126,3,3,0,0,1,0,0.0,0.0,0.0,0.0,1.763309689,1.763309689,             127P    199
1.763309689,1.763309689,1.0,1.0,1.0,1.0,-2.877460172,                127P    200
-1.865454698,-4.089036923,-2.722060823,-2.157510706,                 127P    201
-4.198391631,-2.572016239,-2.456384349,-4.290817549,-2.43006222,     127P    202
-2.761410326,-4.369759445,0.0,1.763309689,0.0,0.0,0.0,0,0;           127P    203
126,3,3,0,0,1,0,0.0,0.0,0.0,0.0,1.156330219,1.156330219,             129P    204
1.156330219,1.156330219,1.0,1.0,1.0,1.0,-2.43006222,                 129P    205
-2.761410326,-4.369759445,-2.321825031,-2.993986724,                 129P    206
-4.429951112,-2.267677595,-3.264436467,-4.45619572,-2.261900318,     129P    207
-3.534075267,-4.459126254,0.0,1.156330219,0.0,0.0,0.0,0,0;           129P    208
126,3,3,0,0,1,0,0.0,0.0,0.0,0.0,0.02005578528,0.02005578528,         131P    209
0.02005578528,0.02005578528,1.0,1.0,1.0,1.0,-2.261900318,            131P    210
-3.534075267,-4.459126254,-2.261800115,-3.538751974,                 131P    211
-4.459177083,-2.261714485,-3.54342893,-4.459220514,-2.261643408,     131P    212
-3.548105988,-4.459256563,0.0,0.02005578528,0.0,0.0,0.0,0,0;         131P    213
126,3,3,0,0,1,0,0.0,0.0,0.0,0.0,1.828615235,1.828615235,             133P    214
1.828615235,1.828615235,1.0,1.0,1.0,1.0,-2.261643408,                133P    215
-3.548105988,-4.459256563,-2.254404158,-4.024466023,                 133P    216
-4.462928162,-2.247178953,-4.500826413,-4.466570475,                 133P    217
-2.239967997,-4.977187153,-4.470183819,0.0,1.828615235,0.0,0.0,      133P    218
0.0,0,0;                                                             133P    219
126,2,2,0,0,1,0,0.0,0.0,0.0,0.05172658246,0.05172658246,             135P    220
0.05172658246,1.0,1.0,1.0,-2.239967997,-4.977187153,                 135P    221
-4.470183819,-2.239662029,-4.997399589,-4.470337136,                 135P    222
-2.239356096,-5.017612027,-4.470490384,0.0,0.05172658246,0.0,        135P    223
0.0,0.0,0,0;                                                         135P    224
126,3,3,0,0,1,0,0.0,0.0,0.0,0.0,2.4085008,2.4085008,2.4085008,       137P    225
2.4085008,1.0,1.0,1.0,1.0,-2.239356096,-5.017612027,                 137P    226
-4.470490384,-2.415938043,-4.553300865,-4.382037032,                 137P    227
-2.610387727,-4.099428048,-4.271828291,-2.817161203,                 137P    228
-3.659599618,-4.130811392,0.0,2.4085008,0.0,0.0,0.0,0,0;             137P    229
126,3,3,0,0,1,0,0.0,0.0,0.0,0.0,1.385555267,1.385555267,             139P    230
1.385555267,1.385555267,1.0,1.0,1.0,1.0,-2.817161203,                139P    231
-3.659599618,-4.130811392,-2.936113241,-3.406576411,                 139P    232
-4.049687604,-3.059033014,-3.158131844,-3.958343612,                 139P    233
-3.183762981,-2.914478334,-3.855340878,0.0,1.385555267,0.0,0.0,      139P    234
0.0,0,0;                                                             139P    235
126,5,5,0,0,1,0,3.318022866,3.318022866,3.318022866,3.318022866,     141P    236
3.318022866,3.318022866,5.491721736,5.491721736,5.491721736,         141P    237
5.491721736,5.491721736,5.491721736,1.0,1.0,1.0,1.0,1.0,1.0,         141P    238
-3.183766614,-2.914438527,-3.855337877,-3.31647965,-2.65175059,      141P    239
-3.745742468,-3.449889183,-2.403787476,-3.625807589,                 141P    240
-3.581518914,-2.153707323,-3.496913551,-3.714709368,                 141P    241
-1.909038087,-3.352865663,-3.843845944,-1.669227022,                 141P    242
-3.197631679,3.318022866,5.491721736,0.0,0.0,0.0,0,0;                141P    243
126,3,3,0,0,1,0,0.0,0.0,0.0,0.0,1.910103532,1.910103532,             143P    244
1.910103532,1.910103532,1.0,1.0,1.0,1.0,-3.843824305,                143P    245
-1.669215281,-3.197657691,-4.011025848,-1.356158495,-2.9966689,      143P    246
-4.170456816,-1.051679975,-2.772478974,-4.312963894,                 143P    247
-0.7541715322,-2.529494506,0.0,1.910103532,0.0,0.0,0.0,0,0;          143P    248
126,3,3,0,0,1,0,7.194516256,7.194516256,7.194516256,7.194516256,     145P    249
9.061615769,9.061615769,9.061615769,9.061615769,1.0,1.0,1.0,1.0,     145P    250
-4.312955813,-0.7540443936,-2.529508282,-4.468022138,                145P    251
-0.4281619852,-2.26511136,-4.60221608,-0.1131537329,-1.979758,       145P    252
-4.708520442,0.1941259447,-1.682211417,7.194516256,9.061615769,      145P    253
0.0,0.0,0.0,0,0;                                                     145P    254
126,4,4,0,0,1,0,0.0,0.0,0.0,0.0,0.0,3.835383475,3.835383475,         147P    255
3.835383475,3.835383475,3.835383475,1.0,1.0,1.0,1.0,1.0,             147P    256
-4.708518579,0.194131773,-1.682216631,-4.855818253,0.6244684934,     147P    257
-1.269925348,-4.955831639,1.04833447,-0.8374477405,-5.0,             147P    258
1.469440994,-0.4076180634,-5.0,1.889253558,0.0,0.0,3.835383475,      147P    259
0.0,0.0,0.0,0,0;                                                     147P    260
110,-5.0,1.889253558,0.0,-5.0,-5.3,0.0,0,0;                          149P    261
124,-1.0,0.0,0.0,0.0,0.0,0.0,-1.0,-5.3,0.0,-1.0,0.0,0.0,0,0;         151P    262
100,0.0,0.0,0.0,5.0,0.0,-5.0,0.0,0,0;                                153P    263
110,5.0,-5.3,0.0,5.0,-4.368984404,0.0,0,0;                           155P    264
126,3,3,0,0,1,0,0.0,0.0,0.0,0.0,1.273845035,1.273845035,             157P    265
1.273845035,1.273845035,1.0,1.0,1.0,1.0,5.0,-4.368984404,0.0,        157P    266
5.0,-4.129007802,-0.1173616019,4.995888514,-3.892435161,             157P    267
-0.2421968876,4.985966942,-3.659581749,-0.3743442988,0.0,            157P    268
1.273845035,0.0,0.0,0.0,0,0;                                         157P    269
126,3,3,0,0,1,0,0.0,0.0,0.0,0.0,1.384214325,1.384214325,             159P    270
1.384214325,1.384214325,1.0,1.0,1.0,1.0,4.985966942,                 159P    271
-3.659581749,-0.3743442988,4.975185739,-3.406553304,                 159P    272
-0.5179413099,4.957524494,-3.157937812,-0.6701871139,                159P    273
4.930661385,-2.914145506,-0.8298061867,0.0,1.384214325,0.0,0.0,      159P    274
0.0,0,0;                                                             159P    275
126,4,4,0,0,1,0,2.346575962,2.346575962,2.346575962,2.346575962,     161P    276
2.346575962,4.510320855,4.510320855,4.510320855,4.510320855,         161P    277
4.510320855,1.0,1.0,1.0,1.0,1.0,4.930663533,-2.914072369,            161P    278
-0.8297934239,4.895005376,-2.586213814,-1.041675523,4.845538875,     161P    279
-2.278971919,-1.262030558,4.778580521,-1.969651433,-1.492764796,     161P    280
4.691681677,-1.671055501,-1.728618825,2.346575962,4.510320855,       161P    281
0.0,0.0,0.0,0,0;                                                     161P    282
126,3,3,0,0,1,0,0.0,0.0,0.0,0.0,1.92552174,1.92552174,               163P    283
1.92552174,1.92552174,1.0,1.0,1.0,1.0,4.69168937,-1.671036915,       163P    284
-1.728597945,4.600599232,-1.355461012,-1.975831047,4.485655563,      163P    285
-1.050257469,-2.226579165,4.346985849,-0.7538749278,                 163P    286
-2.470569576,0.0,1.92552174,0.0,0.0,0.0,0,0;                         163P    287
126,3,3,0,0,1,0,6.216523153,6.216523153,6.216523153,6.216523153,     165P    288
8.083374747,8.083374747,8.083374747,8.083374747,1.0,1.0,1.0,1.0,     165P    289
4.347024741,-0.7538909197,-2.470501144,4.195587684,                  165P    290
-0.4280416953,-2.736965556,4.01557646,-0.1130710182,                 165P    291
-2.995821737,3.811077396,0.1941572499,-3.236616919,6.216523153,      165P    292
8.083374747,0.0,0.0,0.0,0,0;                                         165P    293
126,4,4,0,0,1,0,0.0,0.0,0.0,0.0,0.0,5.050513672,5.050513672,         167P    294
5.050513672,5.050513672,5.050513672,1.0,1.0,1.0,1.0,1.0,             167P    295
3.811072306,0.194187296,-3.236622912,3.439471326,0.7584225575,       167P    296
-3.674177191,2.995544279,1.312905218,-4.060510985,2.512151156,       167P    297
1.871298818,-4.352915773,2.048082492,2.426723759,-4.561289084,       167P    298
0.0,5.050513672,0.0,0.0,0.0,0,0;                                     167P    299
126,3,3,0,0,1,0,0.0,0.0,0.0,0.0,2.060611095,2.060611095,             169P    300
2.060611095,2.060611095,1.0,1.0,1.0,1.0,2.048082492,2.426723759,     169P    301
-4.561289084,1.795628953,2.72887515,-4.674644248,1.550021052,        169P    302
3.029724678,-4.75971704,1.318777811,3.32726411,-4.822947759,0.0,     169P    303
2.060611095,0.0,0.0,0.0,0,0;                                         169P    304
126,3,3,0,0,1,0,0.0,0.0,0.0,0.0,0.0550330394,0.0550330394,           171P    305
0.0550330394,0.0550330394,1.0,1.0,1.0,1.0,1.318913019,               171P    306
3.327377055,-4.822910786,1.313452708,3.334404398,-4.824404008,       171P    307
1.307998488,3.341431651,-4.825885597,1.302550424,3.348458823,        171P    308
-4.827355631,0.0,0.0550330394,0.0,0.0,0.0,0,0;                       171P    309
126,3,3,0,0,1,0,0.0,0.0,0.0,0.0,0.5190162326,0.5190162326,           173P    310
0.5190162326,0.5190162326,1.0,1.0,1.0,1.0,1.302550424,               173P    311
3.348458823,-4.827355631,1.365444479,3.343388883,-4.810385123,       173P    312
1.429824723,3.338814609,-4.791689318,1.495141721,3.334443794,        173P    313
-4.771221147,0.0,0.5190162326,0.0,0.0,0.0,0,0;                       173P    314
126,3,3,0,0,1,0,0.3147515737,0.3147515737,0.3147515737,              175P    315
0.3147515737,1.120844647,1.120844647,1.120844647,1.120844647,        175P    316
1.0,1.0,1.0,1.0,1.495177914,3.334979229,-4.771209805,                175P    317
1.661751832,3.323789409,-4.719009702,1.83283837,3.313176758,         175P    318
-4.655732814,2.00458124,3.303117756,-4.58057355,0.3147515737,        175P    319
1.120844647,0.0,0.0,0.0,0,0;                                         175P    320
126,3,3,0,0,1,0,1.120844647,1.120844647,1.120844647,1.120844647,     177P    321
1.278392694,1.278392694,1.278392694,1.278392694,1.0,1.0,1.0,1.0,     177P    322
2.00458124,3.303117756,-4.58057355,2.038147778,3.301151759,          177P    323
-4.565883938,2.071744844,3.299206811,-4.550741296,2.105354314,       177P    324
3.297282354,-4.53513872,1.120844647,1.278392694,0.0,0.0,0.0,0,0;     177P    325
126,3,3,0,0,1,0,0.0,0.0,0.0,0.0,1.012316811,1.012316811,             179P    326
1.012316811,1.012316811,1.0,1.0,1.0,1.0,2.105354314,3.297282354,     179P    327
-4.53513872,2.288923028,3.286771327,-4.449920338,2.465313547,        179P    328
3.178008833,-4.352936842,2.602543011,3.023701098,-4.269282126,       179P    329
0.0,1.012316811,0.0,0.0,0.0,0,0;                                     179P    330
126,3,3,0,0,1,0,0.0,0.0,0.0,0.0,0.34860928,0.34860928,               181P    331
0.34860928,0.34860928,1.0,1.0,1.0,1.0,2.602543011,3.023701098,       181P    332
-4.269282126,2.643595685,2.9775394,-4.244256526,2.68456556,          181P    333
2.931368988,-4.218468985,2.725404539,2.885178766,-4.191917234,       181P    334
0.0,0.34860928,0.0,0.0,0.0,0,0;                                      181P    335
126,3,3,0,0,1,0,15.61496726,15.61496726,15.61496726,15.61496726,     183P    336
16.53973018,16.53973018,16.53973018,16.53973018,1.0,1.0,1.0,1.0,     183P    337
2.72557655,2.885395584,-4.191805395,2.857478439,2.732869781,         183P    338
-4.106040752,2.989118726,2.582237825,-4.011399524,3.115612425,       183P    339
2.436127195,-3.910621334,15.61496726,16.53973018,0.0,0.0,0.0,0,      183P    340
0;                                                                   183P    341
126,4,4,0,0,1,0,0.0,0.0,0.0,0.0,0.0,4.168032136,4.168032136,         185P    342
4.168032136,4.168032136,4.168032136,1.0,1.0,1.0,1.0,1.0,             185P    343
3.115661897,2.43618728,-3.910581919,3.46935729,2.01990718,           185P    344
-3.628783638,3.80197748,1.599810005,-3.293960915,4.086121541,        185P    345
1.172890062,-2.917039795,4.315127223,0.7330994452,-2.525802258,      185P    346
0.0,4.168032136,0.0,0.0,0.0,0,0;                                     185P    347
126,4,4,0,0,1,0,0.0,0.0,0.0,0.0,0.0,5.680610941,5.680610941,         187P    348
5.680610941,5.680610941,5.680610941,1.0,1.0,1.0,1.0,1.0,             187P    349
4.315127223,0.7330994452,-2.525802258,4.627239064,0.1337088199,      187P    350
-1.992584625,4.836841928,-0.4898413479,-1.42949775,4.938858691,      187P    351
-1.160083764,-0.9045253441,4.97992747,-1.865223847,-0.447573901,     187P    352
0.0,5.680610941,0.0,0.0,0.0,0,0;                                     187P    353
126,3,3,0,0,1,0,0.0,0.0,0.0,0.0,1.47737012,1.47737012,               189P    354
1.47737012,1.47737012,1.0,1.0,1.0,1.0,4.97992747,-1.865223847,       189P    355
-0.447573901,4.994168611,-2.109740478,-0.2891199564,5.0,             189P    356
-2.359102663,-0.1397488435,5.0,-2.612946143,0.0,0.0,1.47737012,      189P    357
0.0,0.0,0.0,0,0;                                                     189P    358
110,5.0,-2.612946143,0.0,5.0,3.7,0.0,0,0;                            191P    359
124,1.0,0.0,0.0,0.0,0.0,0.0,1.0,3.7,0.0,-1.0,0.0,0.0,0,0;            193P    360
100,0.0,0.0,0.0,5.0,0.0,-5.0,0.0,0,0;                                195P    361
110,-5.0,3.7,0.0,-5.0,3.12403649,0.0,0,0;                            197P    362
102,39,117,119,121,123,125,127,129,131,133,135,137,139,141,143,      199P    363
145,147,149,153,155,157,159,161,163,165,167,169,171,173,175,177,     199P    364
179,181,183,185,187,189,191,195,197,0,0;                             199P    365
142,0,115,0,199,2,0,0;                                               201P    366
144,115,1,0,201,0,0;                                                 203P    367
110,0.0,-1.460000048,0.0,0.0,-0.4600000477,0.0,0,0;                  205P    368
110,-2.6,-5.3,0.0,-2.6,3.7,0.0,0,0;                                  207P    369
120,205,207,0.0,6.283185307,0,0;                                     209P    370
110,2.6,-5.3,0.0,2.6,3.7,0.0,0,0;                                    211P    371
124,1.0,0.0,0.0,0.0,0.0,0.0,-1.0,3.7,0.0,1.0,0.0,0.0,0,0;            213P    372
100,0.0,0.0,0.0,2.6,0.0,-2.6,0.0,0,0;                                215P    373
110,-2.6,3.7,0.0,-2.6,-5.3,0.0,0,0;                                  217P    374
124,-1.0,0.0,0.0,0.0,0.0,0.0,1.0,-5.3,0.0,1.0,0.0,0.0,0,0;           219P    375
100,0.0,0.0,0.0,2.6,0.0,-2.6,0.0,0,0;                                221P    376
102,4,211,215,217,221,0,0;                                           223P    377
142,0,209,0,223,2,0,0;                                               225P    378
144,209,1,0,225,0,0;                                                 227P    379
110,0.0,-1.460000048,0.0,0.0,-0.4600000477,0.0,0,0;                  229P    380
110,2.6,-5.3,0.0,2.6,3.7,0.0,0,0;                                    231P    381
120,229,231,0.0,6.283185307,0,0;                                     233P    382
110,-2.6,-5.3,0.0,-2.6,3.7,0.0,0,0;                                  235P    383
124,-1.0,0.0,0.0,0.0,0.0,0.0,-1.0,3.7,0.0,-1.0,0.0,0.0,0,0;          237P    384
100,0.0,0.0,0.0,2.6,0.0,-2.6,0.0,0,0;                                239P    385
110,2.6,3.7,0.0,2.6,-5.3,0.0,0,0;                                    241P    386
124,1.0,0.0,0.0,0.0,0.0,0.0,1.0,-5.3,0.0,-1.0,0.0,0.0,0,0;           243P    387
100,0.0,0.0,0.0,2.6,0.0,-2.6,0.0,0,0;                                245P    388
102,4,235,239,241,245,0,0;                                           247P    389
142,0,233,0,247,2,0,0;                                               249P    390
144,233,1,0,249,0,0;                                                 251P    391
128,5,3,5,3,0,0,1,0,0,0.0,0.0,0.0,0.0,0.0,0.0,7.078130907,           253P    392
7.078130907,7.078130907,7.078130907,7.078130907,7.078130907,0.0,     253P    393
0.0,0.0,0.0,0.9485420728,0.9485420728,0.9485420728,0.9485420728,     253P    394
1.0,1.0,1.0,1.0,1.0,1.0,1.0,1.0,1.0,1.0,1.0,1.0,1.0,1.0,1.0,1.0,     253P    395
1.0,1.0,1.0,1.0,1.0,1.0,1.0,1.0,3.529444883,3.348355582,             253P    396
3.54161246,4.524653269,3.591273444,4.722066091,5.361066704,          253P    397
3.729469482,5.95813166,6.038685189,3.762943696,7.249809168,          253P    398
6.557508722,3.691696086,8.597098615,6.917537304,3.515726653,         253P    399
10.0,3.349457435,3.330747772,3.720981542,4.315363378,                253P    400
3.580636524,4.878228112,5.119021059,3.727546075,6.084686688,         253P    401
5.761383824,3.771654667,7.340423826,6.234000614,3.71105535,          253P    402
8.64092963,6.566037973,3.552181942,10.0,3.132793557,3.313654912,     253P    403
3.909601581,4.043083413,3.554730627,5.020293533,4.805598151,         253P    404
3.702718985,6.184620282,5.421142469,3.757667718,7.402640896,         253P    405
5.891102387,3.722934392,8.675011097,6.214538642,3.588637231,         253P    406
10.0,2.874868184,3.297282354,4.09085968,3.765868524,3.5468322,       253P    407
5.169378122,4.510185806,3.70438814,6.299551375,5.107820031,          253P    408
3.769950173,7.481379439,5.558771199,3.7435183,8.714862314,           253P    409
5.86303931,3.625092521,10.0,0.0,7.078130907,0.0,0.9485420728,0,      253P    410
0;                                                                   253P    411
126,5,5,0,0,1,0,0.0,0.0,0.0,0.0,0.0,0.0,7.078130907,7.078130907,     255P    412
7.078130907,7.078130907,7.078130907,7.078130907,1.0,1.0,1.0,1.0,     255P    413
1.0,1.0,3.529444883,3.348355582,3.54161246,4.524653269,              255P    414
3.591273444,4.722066091,5.361066704,3.729469482,5.95813166,          255P    415
6.038685189,3.762943696,7.249809168,6.557508722,3.691696086,         255P    416
8.597098615,6.917537304,3.515726653,10.0,0.0,7.078130907,0.0,        255P    417
0.0,0.0,0,0;                                                         255P    418
126,3,3,0,0,1,0,0.0,0.0,0.0,0.0,0.9485420728,0.9485420728,           257P    419
0.9485420728,0.9485420728,1.0,1.0,1.0,1.0,6.917537304,               257P    420
3.515726653,10.0,6.566037973,3.552181942,10.0,6.214538642,           257P    421
3.588637231,10.0,5.86303931,3.625092521,10.0,0.0,0.9485420728,       257P    422
0.0,0.0,0.0,0,0;                                                     257P    423
126,5,5,0,0,1,0,0.0,0.0,0.0,0.0,0.0,0.0,7.078130907,7.078130907,     259P    424
7.078130907,7.078130907,7.078130907,7.078130907,1.0,1.0,1.0,1.0,     259P    425
1.0,1.0,5.86303931,3.625092521,10.0,5.558771199,3.7435183,           259P    426
8.714862314,5.107820031,3.769950173,7.481379439,4.510185806,         259P    427
3.70438814,6.299551375,3.765868524,3.5468322,5.169378122,            259P    428
2.874868184,3.297282354,4.09085968,0.0,7.078130907,0.0,0.0,0.0,      259P    429
0,0;                                                                 259P    430
126,3,3,0,0,1,0,0.0,0.0,0.0,0.0,0.9636500343,0.9636500343,           261P    431
0.9636500343,0.9636500343,1.0,1.0,1.0,1.0,2.874868184,               261P    432
3.297282354,4.09085968,3.060303305,3.309053384,3.960544399,          261P    433
3.230811318,3.321602438,3.821715845,3.384409809,3.334979538,         261P    434
3.680463809,0.0,0.9636500343,0.0,0.0,0.0,0,0;                        261P    435
126,3,3,0,0,1,0,0.0,0.0,0.0,0.0,0.2420592982,0.2420592982,           263P    436
0.2420592982,0.2420592982,1.0,1.0,1.0,1.0,3.384409843,               263P    437
3.334979541,3.680463778,3.435194111,3.339402411,3.633761617,         263P    438
3.483513726,3.343862229,3.587385816,3.529444883,3.348355582,         263P    439
3.54161246,0.0,0.2418806497,0.0,0.0,0.0,0,0;                         263P    440
102,5,255,257,259,261,263,0,0;                                       265P    441
110,0.0,0.0,0.0,7.078130907,0.0,0.0,0,0;                             267P    442
110,7.078130907,0.0,0.0,7.078130907,0.9485420728,0.0,0,0;            269P    443
110,7.078130907,0.9485420728,0.0,0.0,0.9485420728,0.0,0,0;           271P    444
126,8,5,1,0,1,0,0.0,0.0,0.0,0.0,0.0,0.0,0.006318584525,              273P    445
0.006318584525,0.006318584525,0.9636500343,0.9636500343,             273P    446
0.9636500343,0.9636500343,0.9636500343,0.9636500343,1.0,1.0,1.0,     273P    447
1.0,1.0,1.0,1.0,1.0,1.0,0.0,0.9485420728,0.0,0.0,0.9476477692,       273P    448
0.0,0.0,0.9467533674,0.0,0.0,0.9458588674,0.0,0.0,0.8094233152,      273P    449
0.0,0.0,0.6707024319,0.0,0.0,0.5303426677,0.0,0.0,0.3875223337,      273P    450
0.0,0.0,0.2420593517,0.0,0.0,0.9636500343,0.0,0.0,1.0,0,0;           273P    451
110,0.0,0.2420592982,0.0,0.0,0.0001786485124,0.0,0,0;                275P    452
102,5,267,269,271,273,275,0,0;                                       277P    453
142,0,253,277,265,1,0,0;                                             279P    454
144,253,1,0,279,0,0;                                                 281P    455
128,5,11,5,5,0,0,1,0,0,0.0,0.0,0.0,0.0,0.0,0.0,5.882369876,          283P    456
5.882369876,5.882369876,5.882369876,5.882369876,5.882369876,0.0,     283P    457
0.0,0.0,0.0,0.0,0.0,6.791496165,6.791496165,6.791496165,             283P    458
10.18724425,10.18724425,10.18724425,13.58299233,13.58299233,         283P    459
13.58299233,13.58299233,13.58299233,13.58299233,1.0,1.0,1.0,1.0,     283P    460
1.0,1.0,1.0,1.0,1.0,1.0,1.0,1.0,1.0,1.0,1.0,1.0,1.0,1.0,1.0,1.0,     283P    461
1.0,1.0,1.0,1.0,1.0,1.0,1.0,1.0,1.0,1.0,1.0,1.0,1.0,1.0,1.0,1.0,     283P    462
1.0,1.0,1.0,1.0,1.0,1.0,1.0,1.0,1.0,1.0,1.0,1.0,1.0,1.0,1.0,1.0,     283P    463
1.0,1.0,1.0,1.0,1.0,1.0,1.0,1.0,1.0,1.0,1.0,1.0,1.0,1.0,1.0,1.0,     283P    464
1.0,1.0,1.0,1.0,6.917537304,3.515726653,10.0,6.557508722,            283P    465
3.691696086,8.597098615,6.038685189,3.762943696,7.249809168,         283P    466
5.361066704,3.729469482,5.95813166,4.524653269,3.591273444,          283P    467
4.722066091,3.529444883,3.348355582,3.54161246,5.507099382,          283P    468
2.885433073,10.0,5.28501522,3.023676489,8.651883191,4.979913859,     283P    469
3.050021839,7.417380017,4.547157352,2.982842587,6.251313786,         283P    470
3.943975191,2.840458646,5.108177075,3.127130007,2.64120332,          283P    471
3.942545142,4.128038002,2.184828726,10.0,3.998675377,2.29131936,     283P    472
8.694100055,3.851399519,2.28086583,7.577556526,3.614558303,          283P    473
2.188299412,6.550338752,3.219058174,2.048400331,5.511985891,         283P    474
2.595165934,1.895961574,4.362144646,2.785091736,1.416044538,         283P    475
10.0,2.721147292,1.494891119,8.724533951,2.660781688,                283P    476
1.463958439,7.717483285,2.540390786,1.365936228,6.823573986,         283P    477
2.298798566,1.243500389,5.88715939,1.874221981,1.139330283,          283P    478
4.752685997,0.8315099895,0.1644157752,10.0,0.8448263362,             283P    479
0.2062544423,8.754817231,0.8525609574,0.1656430226,7.827318132,      283P    480
0.8338825326,0.08518951671,7.027749666,0.7694919002,                 283P    481
0.007564015901,6.166196483,0.6397068593,-0.0245789112,               283P    482
5.052783809,-1.021482134,-1.228234439,10.0,-0.937005818,             283P    483
-1.217786707,8.766273968,-0.8635390014,-1.251621023,7.813341335,     283P    484
-0.7836413962,-1.29581908,6.97668117,-0.6794888245,-1.316342439,     283P    485
6.091839412,-0.5333530814,-1.279182694,4.994345281,-1.627451042,     283P    486
-1.707750378,10.0,-1.518532667,-1.707201642,8.768235753,             283P    487
-1.419475059,-1.73781836,7.795735347,-1.302649105,-1.769004187,      283P    488
6.932741437,-1.140408253,-1.770027952,6.029632753,-0.9051103109,     283P    489
-1.710192191,4.936754006,-2.814998482,-2.696589224,10.0,             283P    490
-2.653284437,-2.714743807,8.768967297,-2.487351651,-2.736824803,     283P    491
7.742694788,-2.278858853,-2.739893248,6.808857943,-1.990058941,      283P    492
-2.700860604,5.855373758,-1.583056271,-2.59667573,4.770098848,       283P    493
-3.951838766,-3.743355642,10.0,-3.725236051,-3.777924874,            283P    494
8.764464859,-3.460660941,-3.788609882,7.666627514,-3.126761216,      283P    495
-3.761223587,6.64025241,-2.692970485,-3.681454535,5.619347897,       283P    496
-2.1285259,-3.535022365,4.53786135,-4.507100518,-4.280799155,        283P    497
10.0,-4.243962744,-4.322978711,8.761192662,-3.921460568,             283P    498
-4.327411863,7.626134591,-3.516133803,-4.284444025,6.551916795,      283P    499
-3.005254597,-4.184321485,5.495840324,-2.365912013,-4.017315313,     283P    500
4.415153715,-5.048740731,-4.831855512,10.0,-4.744197226,             283P    501
-4.880966774,8.757246365,-4.356663502,-4.878716607,7.585689379,      283P    502
-3.873600064,-4.820011004,6.464739938,-3.282952589,-4.699697402,     283P    503
5.373940775,-2.57254546,-4.51263788,4.292801662,-5.57631471,         283P    504
-5.396051381,10.0,-5.224395916,-5.451350527,8.752867416,             283P    505
-4.765993067,-5.441156164,7.546759569,-4.201106163,-5.365468293,     283P    506
6.381676461,-3.529735205,-5.224286914,5.257618091,-2.751880192,      283P    507
-5.017612027,4.174584459,0.0,5.882369876,0.0,13.58299233,0,0;        283P    508
126,5,5,0,0,1,0,0.0,0.0,0.0,0.0,0.0,0.0,5.882369876,5.882369876,     285P    509
5.882369876,5.882369876,5.882369876,5.882369876,1.0,1.0,1.0,1.0,     285P    510
1.0,1.0,6.917537304,3.515726653,10.0,6.557508722,3.691696086,        285P    511
8.597098615,6.038685189,3.762943696,7.249809168,5.361066704,         285P    512
3.729469482,5.95813166,4.524653269,3.591273444,4.722066091,          285P    513
3.529444883,3.348355582,3.54161246,0.0,5.882369876,0.0,0.0,0.0,      285P    514
0,0;                                                                 285P    515
126,5,5,0,0,1,0,0.0,0.0,0.0,0.0,0.0,0.0,0.039429061,0.039429061,     287P    516
0.039429061,0.039429061,0.039429061,0.039429061,1.0,1.0,1.0,1.0,     287P    517
1.0,1.0,3.529444883,3.348355582,3.54161246,3.527109183,              287P    518
3.344250102,3.543940136,3.524769113,3.340143338,3.54626844,          287P    519
3.522424662,3.336035296,3.548597365,3.520075817,3.331925981,         287P    520
3.5509269,3.517722569,3.327815397,3.553257035,2.174754971E-005,      287P    521
0.039429061,0.0,0.0,0.0,0,0;                                         287P    522
126,5,5,0,0,1,0,0.04742947872,0.04742947872,0.04742947872,           289P    523
0.04742947872,0.04742947872,0.04742947872,7.166472462,               289P    524
7.166472462,7.166472462,7.166472462,7.166472462,7.166472462,1.0,     289P    525
1.0,1.0,1.0,1.0,1.0,3.517722565,3.32781539,3.553257039,              289P    526
3.16463814,2.711058155,3.902873561,2.719920913,2.080800141,          289P    527
4.258438119,2.162723927,1.459548337,4.578211152,1.542961923,         289P    528
0.8391763057,4.800817495,0.8973964257,0.1941154709,4.918789909,      289P    529
0.04742947872,7.166472462,0.0,0.0,0.0,0,0;                           289P    530
126,3,3,0,0,1,0,7.16647247,7.16647247,7.16647247,7.16647247,         291P    531
9.22395857,9.22395857,9.22395857,9.22395857,1.0,1.0,1.0,1.0,         291P    532
0.8973964222,0.1941154674,4.918789909,0.5864365451,                  291P    533
-0.1166013206,4.975615572,0.2702836816,-0.4325583158,5.00196491,     291P    534
-0.03424693747,-0.7542569471,4.999905604,7.16647247,9.22395857,      291P    535
0.0,0.0,0.0,0,0;                                                     291P    536
126,3,3,0,0,1,0,9.22395857,9.22395857,9.22395857,9.22395857,         293P    537
10.98551371,10.98551371,10.98551371,10.98551371,1.0,1.0,1.0,1.0,     293P    538
-0.03424693747,-0.7542569471,4.999905604,-0.2949765129,              293P    539
-1.029685237,4.99814249,-0.5477312792,-1.309614972,4.97585042,       293P    540
-0.787505016,-1.597017304,4.937594117,9.22395857,10.98551371,        293P    541
0.0,0.0,0.0,0,0;                                                     293P    542
126,3,3,0,0,1,0,10.98554926,10.98554926,10.98554926,10.98554926,     295P    543
13.58067253,13.58067253,13.58067253,13.58067253,1.0,1.0,1.0,1.0,     295P    544
-0.7875195312,-1.597034703,4.937591801,-1.140753446,                 295P    545
-2.020436273,4.881231671,-1.46354948,-2.458978041,4.790563639,       295P    546
-1.747099229,-2.91478522,4.684836526,10.98554926,13.58067253,        295P    547
0.0,0.0,0.0,0,0;                                                     295P    548
126,3,3,0,0,1,0,13.58067284,13.58067284,13.58067284,13.58067284,     297P    549
17.37454195,17.37454195,17.37454195,17.37454195,1.0,1.0,1.0,1.0,     297P    550
-1.747099331,-2.914785384,4.684836488,-2.161627075,-3.581140159,     297P    551
4.530271638,-2.492139534,-4.286229347,4.345805135,-2.751880192,      297P    552
-5.017612027,4.174584459,13.58067284,17.37454195,0.0,0.0,0.0,0,      297P    553
0;                                                                   297P    554
126,5,5,0,0,1,0,0.0,0.0,0.0,0.0,0.0,0.0,5.882369876,5.882369876,     299P    555
5.882369876,5.882369876,5.882369876,5.882369876,1.0,1.0,1.0,1.0,     299P    556
1.0,1.0,-2.751880192,-5.017612027,4.174584459,-3.529735205,          299P    557
-5.224286914,5.257618091,-4.201106163,-5.365468293,6.381676461,      299P    558
-4.765993067,-5.441156164,7.546759569,-5.224395916,-5.451350527,     299P    559
8.752867416,-5.57631471,-5.396051381,10.0,0.0,5.882369876,0.0,       299P    560
0.0,0.0,0,0;                                                         299P    561
126,8,5,0,0,1,0,0.0,0.0,0.0,0.0,0.0,0.0,3.395748082,3.395748082,     301P    562
3.395748082,5.933180386,5.933180386,5.933180386,5.933180386,         301P    563
5.933180386,5.933180386,1.0,1.0,1.0,1.0,1.0,1.0,1.0,1.0,1.0,         301P    564
-5.57631471,-5.396051381,10.0,-5.048740731,-4.831855512,10.0,        301P    565
-4.507100518,-4.280799155,10.0,-3.951838766,-3.743355642,10.0,       301P    566
-2.958673444,-2.828880565,10.0,-1.926807901,-1.958616403,10.0,       301P    567
-1.478634536,-1.594694215,10.0,-1.023790531,-1.239201941,10.0,       301P    568
-0.5624883299,-0.8922993501,10.0,0.0,5.933180386,0.0,0.0,0.0,0,      301P    569
0;                                                                   301P    570
126,8,5,0,0,1,0,0.0,0.0,0.0,0.0,0.0,0.0,0.8583157785,                303P    571
0.8583157785,0.8583157785,7.649811943,7.649811943,7.649811943,       303P    572
7.649811943,7.649811943,7.649811943,1.0,1.0,1.0,1.0,1.0,1.0,1.0,     303P    573
1.0,1.0,-0.5624883299,-0.8922993501,10.0,-0.4064475335,              303P    574
-0.7749555427,10.0,-0.2496677847,-0.6585945744,10.0,                 303P    575
-0.09215730626,-0.5432226288,10.0,1.318106886,0.4761706696,10.0,     303P    576
2.785091736,1.416044538,10.0,4.128038002,2.184828726,10.0,           303P    577
5.507099382,2.885433073,10.0,6.917537304,3.515726653,10.0,0.0,       303P    578
7.649811943,0.0,0.0,0.0,0,0;                                         303P    579
102,10,285,287,289,291,293,295,297,299,301,303,0,0;                  305P    580
110,0.0,0.0,0.0,5.882369876,0.0,0.0,0,0;                             307P    581
110,5.882369876,2.174754971E-005,0.0,5.882369876,0.039429061,        309P    582
0.0,0,0;                                                             309P    583
126,8,5,1,0,1,0,0.04742947872,0.04742947872,0.04742947872,           311P    584
0.04742947872,0.04742947872,0.04742947872,5.018102777,               311P    585
5.018102777,5.018102777,7.166472462,7.166472462,7.166472462,         311P    586
7.166472462,7.166472462,7.166472462,1.0,1.0,1.0,1.0,1.0,1.0,1.0,     311P    587
1.0,1.0,5.882369876,0.0394290742,0.0,5.882369876,0.8655636104,       311P    588
0.0,5.882369876,1.675537236,0.0,5.882369876,2.475205088,0.0,         311P    589
5.882369876,3.595441137,0.0,5.882369876,4.698875796,0.0,             311P    590
5.882369876,5.032132988,0.0,5.882369876,5.365609686,0.0,             311P    591
5.882369876,5.698901957,0.0,0.04742947872,7.166472462,0.0,0.0,       311P    592
1.0,0,0;                                                             311P    593
126,5,5,1,0,1,0,7.16647247,7.16647247,7.16647247,7.16647247,         313P    594
7.16647247,7.16647247,9.22395857,9.22395857,9.22395857,              313P    595
9.22395857,9.22395857,9.22395857,1.0,1.0,1.0,1.0,1.0,1.0,            313P    596
5.882369876,5.698901963,0.0,5.882369876,6.018094801,0.0,             313P    597
5.882369876,6.337118486,0.0,5.882369876,6.655618211,0.0,             313P    598
5.882369876,6.972937658,0.0,5.882369876,7.28931313,0.0,              313P    599
7.16647247,9.22395857,0.0,0.0,1.0,0,0;                               313P    600
126,8,5,1,0,1,0,9.22395857,9.22395857,9.22395857,9.22395857,         315P    601
9.22395857,9.22395857,10.27329502,10.27329502,10.27329502,           315P    602
10.98551371,10.98551371,10.98551371,10.98551371,10.98551371,         315P    603
10.98551371,1.0,1.0,1.0,1.0,1.0,1.0,1.0,1.0,1.0,5.882369876,         315P    604
7.28931313,0.0,5.882369876,7.450667471,0.0,5.882369876,              315P    605
7.611776276,0.0,5.882369876,7.772670892,0.0,5.882369876,             315P    606
8.042564343,0.0,5.882369876,8.31265756,0.0,5.882369876,              315P    607
8.421891926,0.0,5.882369876,8.531159883,0.0,5.882369876,             315P    608
8.640463664,0.0,9.22395857,10.98551371,0.0,0.0,1.0,0,0;              315P    609
126,5,5,1,0,1,0,10.98554926,10.98554926,10.98554926,10.98554926,     317P    610
10.98554926,10.98554926,13.58067253,13.58067253,13.58067253,         317P    611
13.58067253,13.58067253,13.58067253,1.0,1.0,1.0,1.0,1.0,1.0,         317P    612
5.882369876,8.64049094,0.0,5.882369876,9.038762999,0.0,              317P    613
5.882369876,9.437510682,0.0,5.882369876,9.836841985,0.0,             317P    614
5.882369876,10.23703307,0.0,5.882369876,10.63810014,0.0,             317P    615
10.98554926,13.58067253,0.0,0.0,1.0,0,0;                             317P    616
126,8,5,1,0,1,0,13.58067284,13.58067284,13.58067284,13.58067284,     319P    617
13.58067284,13.58067284,15.51292822,15.51292822,15.51292822,         319P    618
17.37454195,17.37454195,17.37454195,17.37454195,17.37454195,         319P    619
17.37454195,1.0,1.0,1.0,1.0,1.0,1.0,1.0,1.0,1.0,5.882369876,         319P    620
10.63810038,0.0,5.882369876,10.93672358,0.0,5.882369876,             319P    621
11.23583241,0.0,5.882369876,11.53543356,0.0,5.882369876,             319P    622
12.12450559,0.0,5.882369876,12.71422537,0.0,5.882369876,             319P    623
13.00387383,0.0,5.882369876,13.29339172,0.0,5.882369876,             319P    624
13.58299233,0.0,13.58067284,17.37454195,0.0,0.0,1.0,0,0;             319P    625
110,5.882369876,13.58299233,0.0,0.0,13.58299233,0.0,0,0;             321P    626
110,0.0,13.58299233,0.0,0.0,7.649811943,0.0,0,0;                     323P    627
110,0.0,7.649811943,0.0,0.0,0.0,0.0,0,0;                             325P    628
102,10,307,309,311,313,315,317,319,321,323,325,0,0;                  327P    629
142,0,283,327,305,1,0,0;                                             329P    630
144,283,1,0,329,0,0;                                                 331P    631
128,3,5,3,5,0,0,1,0,0,0.0,0.0,0.0,0.0,1.172865903,1.172865903,       333P    632
1.172865903,1.172865903,0.0,0.0,0.0,0.0,0.0,0.0,6.535011818,         333P    633
6.535011818,6.535011818,6.535011818,6.535011818,6.535011818,1.0,     333P    634
1.0,1.0,1.0,1.0,1.0,1.0,1.0,1.0,1.0,1.0,1.0,1.0,1.0,1.0,1.0,1.0,     333P    635
1.0,1.0,1.0,1.0,1.0,1.0,1.0,-2.751880192,-5.017612027,               333P    636
4.174584459,-2.744956835,-4.52777645,4.179148326,-2.737999421,       333P    637
-4.037941102,4.183709937,-2.731007762,-3.548105988,4.188268927,      333P    638
-3.529735205,-5.224286914,5.257618091,-3.503590104,-4.770534401,     333P    639
5.261052817,-3.492537079,-4.402223643,5.264804063,-3.466262343,      333P    640
-3.948798368,5.268208956,-4.201106163,-5.365468293,6.381676461,      333P    641
-4.157897616,-4.943629953,6.384078351,-4.137769043,-4.652181687,     333P    642
6.386974179,-4.094429979,-4.230673749,6.389352077,-4.765993067,      333P    643
-5.441156164,7.546759569,-4.708027497,-5.04775224,7.548236807,       333P    644
-4.67357014,-4.786965924,7.550226238,-4.615510667,-4.393732131,      333P    645
7.551698292,-5.224395916,-5.451350527,8.752867416,-5.156779977,      333P    646
-5.098574292,8.753600437,-5.09714172,-4.790746445,8.754510199,       333P    647
-5.029504409,-4.437973513,8.755247599,-5.57631471,-5.396051381,      333P    648
10.0,-5.496346875,-5.051833552,10.0,-5.41637904,-4.707615724,        333P    649
10.0,-5.336411204,-4.363397896,10.0,0.0,1.172865903,0.0,             333P    650
6.535011818,0,0;                                                     333P    651
126,3,3,0,0,1,0,0.0,0.0,0.0,0.0,1.880341817,1.880341817,             335P    652
1.880341817,1.880341817,1.0,1.0,1.0,1.0,-2.751880192,                335P    653
-5.017612027,4.174584459,-2.744956833,-4.527776309,4.179148328,      335P    654
-2.737999419,-4.037940961,4.183709939,-2.731007762,-3.548105988,     335P    655
4.188268927,0.0,1.880341817,0.0,0.0,0.0,0,0;                         335P    656
126,5,5,0,0,1,0,0.0,0.0,0.0,0.0,0.0,0.0,6.535011818,6.535011818,     337P    657
6.535011818,6.535011818,6.535011818,6.535011818,1.0,1.0,1.0,1.0,     337P    658
1.0,1.0,-2.731007762,-3.548105988,4.188268927,-3.466262343,          337P    659
-3.948798368,5.268208956,-4.094429979,-4.230673749,6.389352077,      337P    660
-4.615510667,-4.393732131,7.551698292,-5.029504409,-4.437973513,     337P    661
8.755247599,-5.336411204,-4.363397896,10.0,0.0,6.535011818,0.0,      337P    662
0.0,0.0,0,0;                                                         337P    663
126,3,3,0,0,1,0,0.0,0.0,0.0,0.0,1.172865903,1.172865903,             339P    664
1.172865903,1.172865903,1.0,1.0,1.0,1.0,-5.336411204,                339P    665
-4.363397896,10.0,-5.41637904,-4.707615724,10.0,-5.496346875,        339P    666
-5.051833552,10.0,-5.57631471,-5.396051381,10.0,0.0,1.172865903,     339P    667
0.0,0.0,0.0,0,0;                                                     339P    668
126,5,5,0,0,1,0,0.0,0.0,0.0,0.0,0.0,0.0,6.535011818,6.535011818,     341P    669
6.535011818,6.535011818,6.535011818,6.535011818,1.0,1.0,1.0,1.0,     341P    670
1.0,1.0,-5.57631471,-5.396051381,10.0,-5.224395916,-5.451350527,     341P    671
[truncated: 742,204 more chars]
